# Supplementary material for: Mechanistic Studies of Oxygen-Atom Transfer (OAT) in the Homogeneous Conversion of N2O by Ru Pincer Complexes
Source: MDPI journal article supplement (doi:10.3390/inorganics10060069), 2022-05-25
Supplement: s1 [file s1]

--Supporting Information--

**Mechanistic Studies of Oxygen-Atom Transfer (OAT) in the Homogeneous Conversion of  
N<sub>2</sub>O by Ru Pincer Complexes**

*Guangchao Liang<sup>1,\*</sup>, Min Zhang<sup>2</sup>, and Charles Edwin Webster<sup>3,\*</sup>*

<sup>1</sup> Academy of Advanced Interdisciplinary Research, Xidian University, Xi'an, Shaanxi  
710071, P.R. China

<sup>2</sup> Department of Pharmacy, Medical School, Xi'an International University, Xi'an, Shaanxi  
710077, P.R. China

<sup>3</sup> Department of Chemistry, Mississippi State University, Mississippi State, Mississippi  
39762-9573, United States

**Table of Contents**

|                                                                                                                                                                                                               |     |
|---------------------------------------------------------------------------------------------------------------------------------------------------------------------------------------------------------------|-----|
| Table S1. Comparisons of the Gibbs free energies of activation computed from SMD(THF)-B3LYP-GD3BJ/BS2//B3LYP-GD3BJ/BS1 and SMD(THF)-B3LYP-GD3BJ/BS2.....                                                      | S2  |
| Figure S1. Linear relationship between the SMD(THF)-B3LYP-GD3BJ/BS2//B3LYP-GD3BJ/BS1 computed Gibbs free energies of activation and SMD(THF)-B3LYP-GD3BJ/BS2 computed Gibbs free energies of activation. .... | S2  |
| Scheme S1. B3LYP-GD3BJ/BS1 and SMD(THF)-B3LYP-GD3BJ/BS2 computed APT charges of N <sub>2</sub> O. ....                                                                                                        | S2  |
| Figure S2. IRC plots for TS-1-2. ....                                                                                                                                                                         | S3  |
| Figure S3. IRC plots for TS-2-3. ....                                                                                                                                                                         | S3  |
| Figure S4. IRC plots for TS-3-4. ....                                                                                                                                                                         | S4  |
| Figure S5. IRC plots for TS-3-4-OH <sub>2</sub> . ....                                                                                                                                                        | S4  |
| Figure S6. Free energy diagram for an alternative higher-energy pathway for proton transfer to the terminal N of endo N <sub>2</sub> O. ....                                                                  | S5  |
| Scheme S2. Free energy diagram for proton transfer to the terminal O of endo N <sub>2</sub> O. ....                                                                                                           | S6  |
| Figure S7. Free energy diagram for N <sub>2</sub> generation from hydride transfer to the central N of N <sub>2</sub> O. ....                                                                                 | S7  |
| Figure S8. Free energy diagram for a higher-energy hydride transfer to the central N of N <sub>2</sub> O.....                                                                                                 | S7  |
| Figure S9. Linear fitting between the Gibbs free energies of activation ( $\Delta G^\ddagger$ ) of TS-1-2 and the computed hydricities ( $\Delta G_{\text{H}^-}$ ). ....                                      | S8  |
| Table S2. DFT computed energies (in Hartrees) of various species. ....                                                                                                                                        | S9  |
| Table S3. SMD(THF)-B3LYP-GD3BJ/BS2 computed energies (in Hartrees) of various species. ....                                                                                                                   | S11 |
| Table S4. Cartesian coordinates of optimized various species. ....                                                                                                                                            | S11 |

**Table S1.** Comparisons of the Gibbs free energies of activation computed from SMD(THF)-B3LYP-GD3BJ/BS2//B3LYP-GD3BJ/BS1 and SMD(THF)-B3LYP-GD3BJ/BS2.

| TS                        | SMD(THF)-B3LYP-GD3BJ/BS2 | SMD(THF)-B3LYP-GD3BJ/BS2//B3LYP-GD3BJ/BS1 |
|---------------------------|--------------------------|-------------------------------------------|
| TS-1-2                    | 23.2                     | 24.1                                      |
| TS-2-3                    | 5.0                      | 5.5                                       |
| TS-3-4                    | 26.9                     | 26.6                                      |
| TS-1-2b                   | 26.3                     | 26.4                                      |
| TS-2b-3b                  | 6.0                      | 5.8                                       |
| TS-1-2d                   | 40.7                     | 40.6                                      |
| TS-3-4-OH <sub>2</sub>    | 14.3                     | 15.1                                      |
| TS-3-4-OH <sub>2</sub> -b | 17.0                     | 16.2                                      |
| MSD = -0.1, MAD = 0.5     |                          |                                           |

MSD: mean signed deviation. MAD: mean absolute deviation.

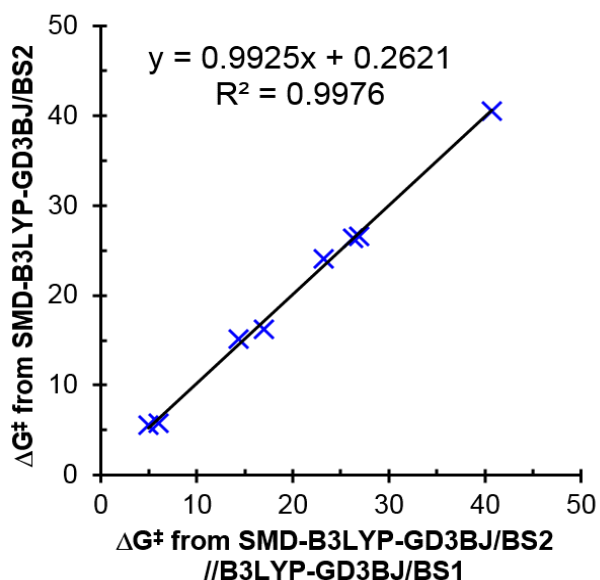

**Figure S1.** Linear relationship between the SMD(THF)-B3LYP-GD3BJ/BS2//B3LYP-GD3BJ/BS1 computed Gibbs free energies of activation and SMD(THF)-B3LYP-GD3BJ/BS2 computed Gibbs free energies of activation.

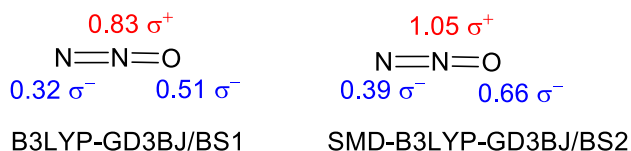

**Scheme S1.** B3LYP-GD3BJ/BS1 and SMD(THF)-B3LYP-GD3BJ/BS2 computed APT charges of N<sub>2</sub>O.

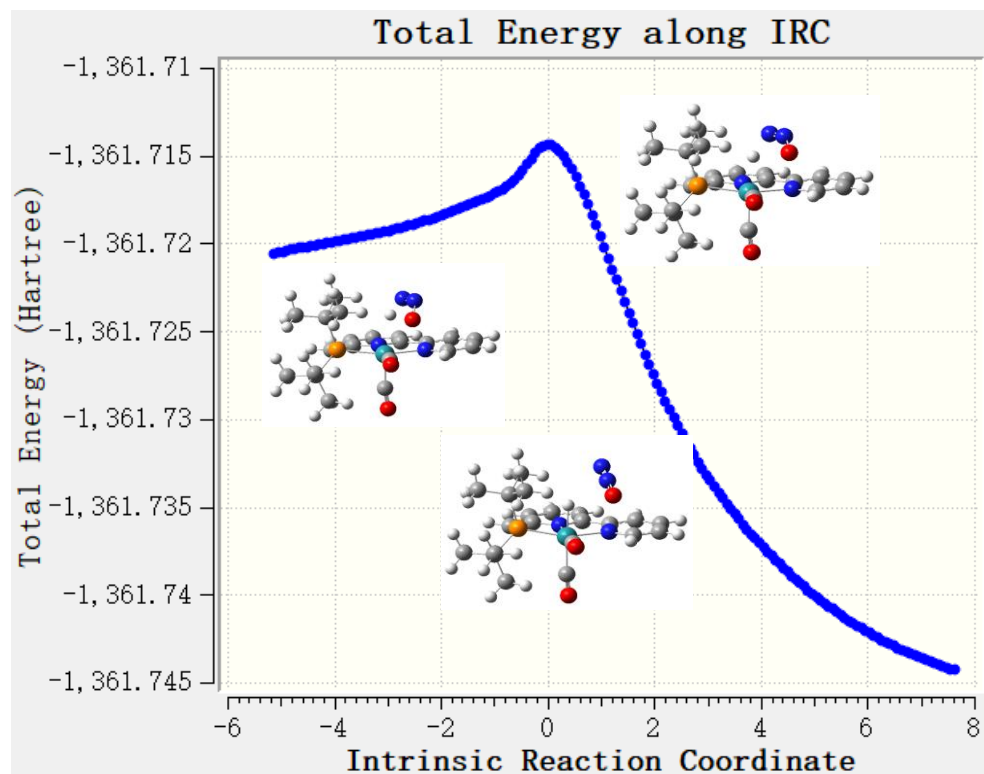

Figure S2. IRC plots for TS-1-2.

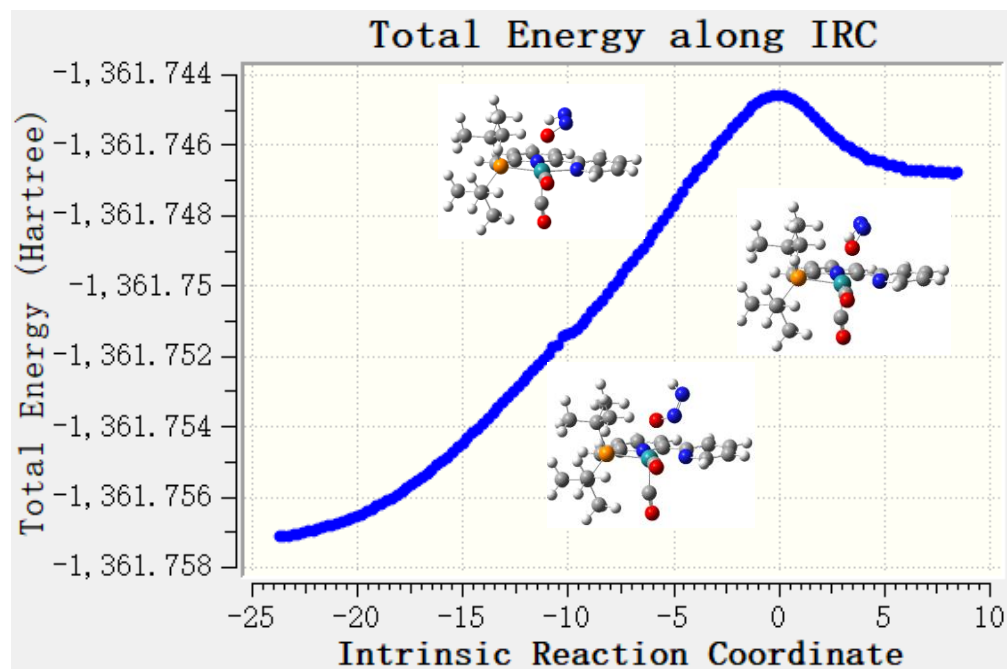

Figure S3. IRC plots for TS-2-3.

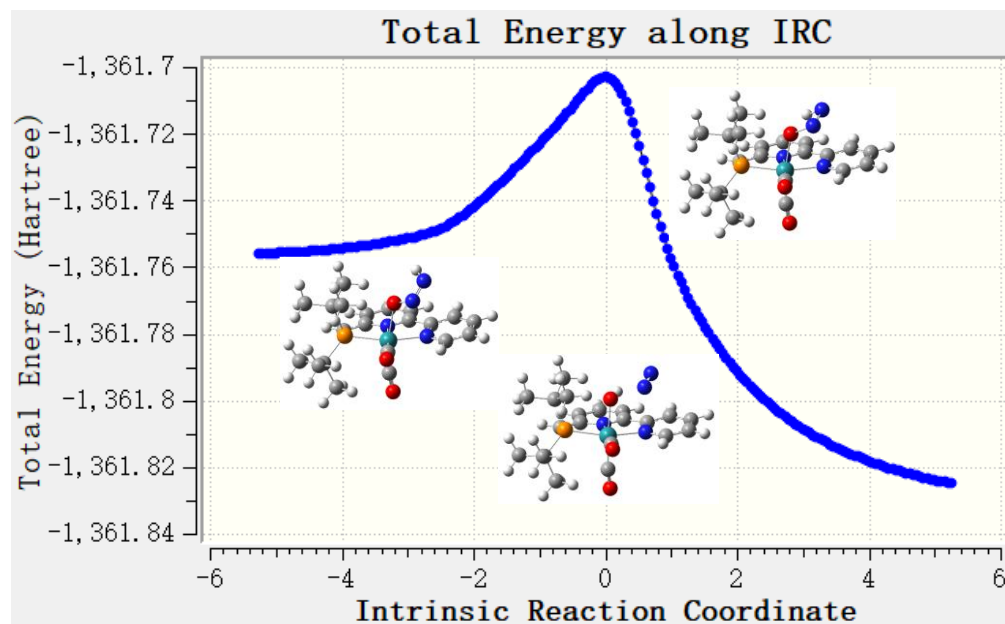

**Figure S4.** IRC plots for TS-3-4.

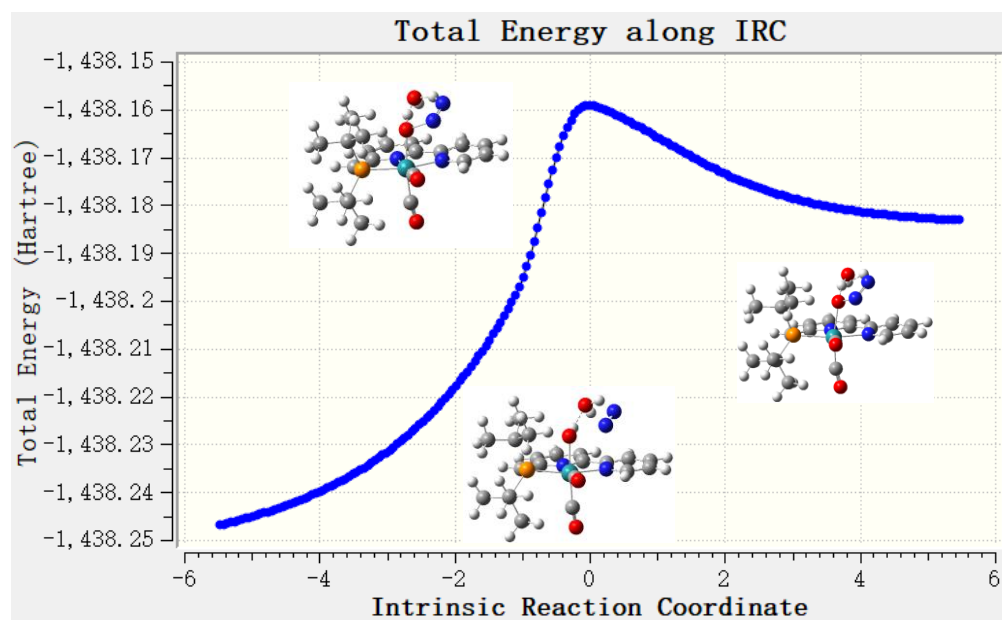

**Figure S5.** IRC plots for TS-3-4-OH<sub>2</sub>.

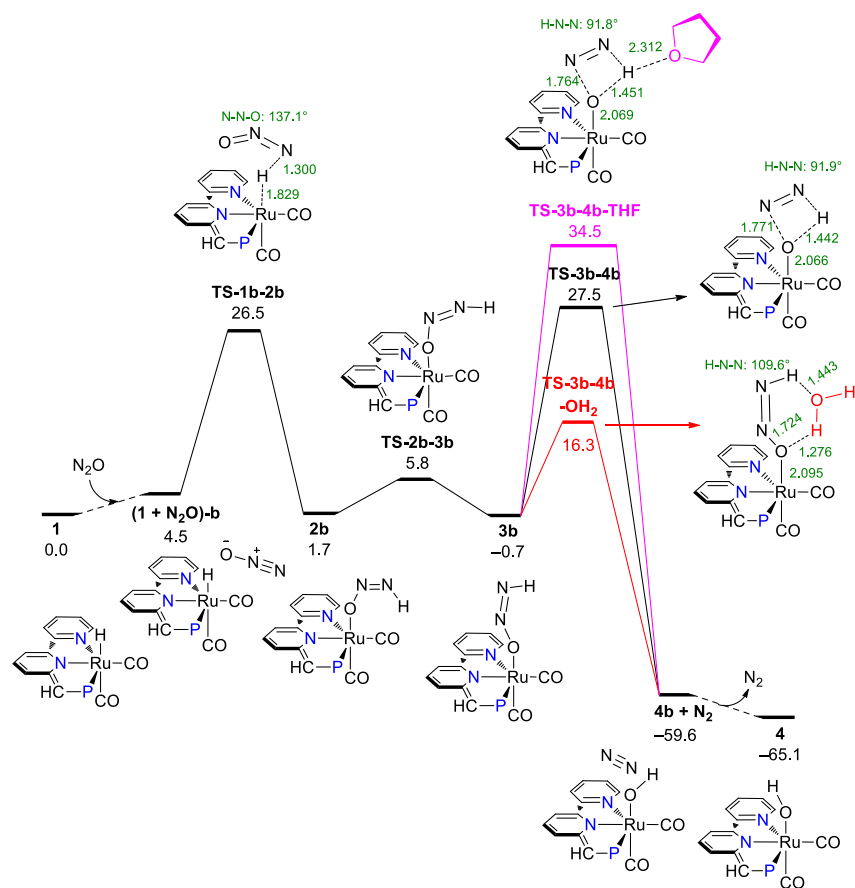

**Figure S6.** Free energy diagram for an alternative higher-energy pathway for proton transfer to the terminal N of endo  $\text{N}_2\text{O}$ .

Selected atom distances are given in Å and selected bond angles are given in °.  $\Delta G^\circ/\Delta G^\ddagger$  are in kcal mol<sup>-1</sup>. Energy values are the results from SMD(THF)-B3LYP-GD3BJ/BS2//B3LYP-GD3BJ/BS1 computations.

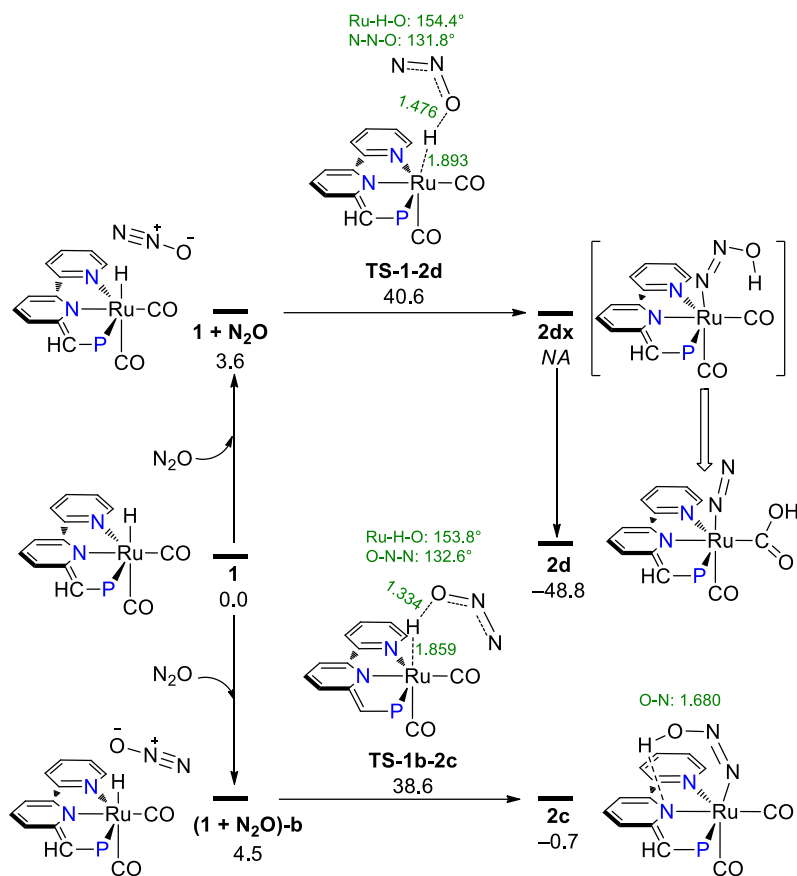

**Scheme S2.** Free energy diagram for proton transfer to the terminal O of endo  $\text{N}_2\text{O}$ . Selected atom distances are given in Å and selected bond angles are given in °.  $\Delta G^\circ/\Delta G^\ddagger$  are in kcal mol<sup>-1</sup>. Energy values are the results from SMD(THF)-B3LYP-GD3BJ/BS2//B3LYP-GD3BJ/BS1 computations.

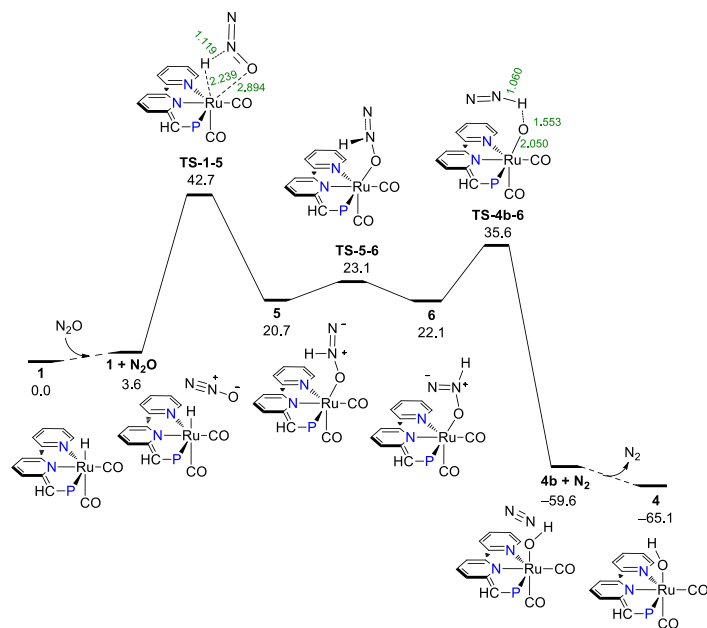

**Figure S7.** Free energy diagram for N<sub>2</sub> generation from hydride transfer to the central N of N<sub>2</sub>O. Selected atom distances are given in Å and selected bond angles are given in °.  $\Delta G^\circ/\Delta G^\ddagger$  are in kcal mol<sup>-1</sup>. Energy values are the results from SMD(THF)-B3LYP-GD3BJ/BS2//B3LYP-GD3BJ/BS1 computations.

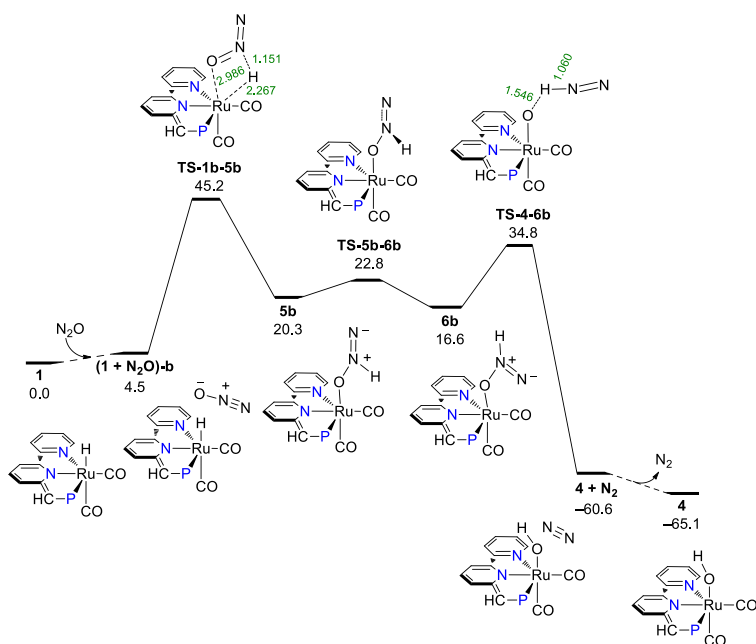

**Figure S8.** Free energy diagram for a higher-energy hydride transfer to the central N of N<sub>2</sub>O. Selected atom distances are given in Å and selected bond angles are given in °.  $\Delta G^\circ/\Delta G^\ddagger$  are in kcal mol<sup>-1</sup>. Energy values are the results from SMD(THF)-B3LYP-GD3BJ/BS2//B3LYP-GD3BJ/BS1 computations.

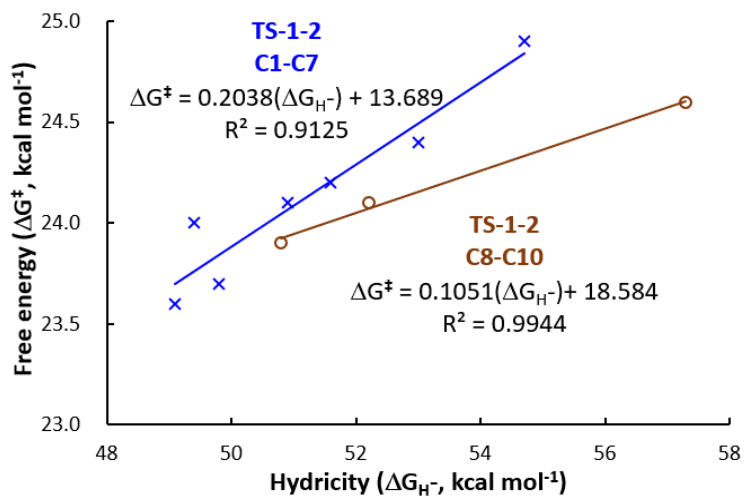

**Figure S9.** Linear fitting between the Gibbs free energies of activation ( $\Delta G^\ddagger$ ) of TS-1-2 and the computed hydricities ( $\Delta G_{H^-}$ ).



**Table S2.** DFT computed energies (in Hartrees) of various species.

| <b>Species</b>                 | <b>E<sub>(gas, B3LYP-GD3BJ/BS1)</sub></b> | <b>G<sub>(gas, B3LYP-GD3BJ/BS1)</sub></b> | <b>E<sub>(soln, SMD-B3LYP-GD3BJ/BS2//B3LYP-GD3BJ/BS1)</sub></b> |
|--------------------------------|-------------------------------------------|-------------------------------------------|-----------------------------------------------------------------|
| <b>N<sub>2</sub>O</b>          | -184.658971                               | -184.669064                               | -184.729755                                                     |
| <b>N<sub>2</sub></b>           | -109.522714                               | -109.535552                               | -109.562406                                                     |
| <b>H<sub>2</sub>O</b>          | -76.404046                                | -76.400591                                | -76.468124                                                      |
| <b>THF</b>                     | -232.458409                               | -232.369444                               | -232.556171                                                     |
| <b>H<sup>-</sup></b>           | -0.461817                                 | -0.471816                                 | -0.640209                                                       |
| <b>PNN-Ru-H</b>                |                                           |                                           |                                                                 |
| <b>1</b>                       | -1177.076496                              | -1176.694021                              | -1513.420072                                                    |
| <b>1<sup>+</sup></b>           | -1176.29006                               | -1175.914815                              | -1512.681440                                                    |
| <b>1 + N<sub>2</sub>O</b>      | -1361.746471                              | -1361.360602                              | -1698.157617                                                    |
| <b>TS-1-2</b>                  | -1361.714377                              | -1361.326746                              | -1698.126602                                                    |
| <b>2</b>                       | -1361.746818                              | -1361.350500                              | -1698.167746                                                    |
| <b>TS-2-3</b>                  | -1361.744605                              | -1361.348820                              | -1698.164476                                                    |
| <b>3</b>                       | -1361.757287                              | -1361.362485                              | -1698.176070                                                    |
| <b>TS-3-4</b>                  | -1361.702945                              | -1361.315754                              | -1698.122212                                                    |
| <b>TS-3-4-OH<sub>2</sub></b>   | -1438.159165                              | -1437.747611                              | -1774.629635                                                    |
| <b>TS-3-4-THF</b>              | -1594.182441                              | -1593.684062                              | -1930.688574                                                    |
| <b>4 + N<sub>2</sub></b>       | -1361.836090                              | -1361.448272                              | -1698.261804                                                    |
| <b>4</b>                       | -1252.305472                              | -1251.917193                              | -1588.694276                                                    |
| <b>(1 + N<sub>2</sub>O)-b</b>  | -1361.746481                              | -1361.359522                              | -1698.157177                                                    |
| <b>TS-1b-2b</b>                | -1361.708821                              | -1361.320808                              | -1698.123250                                                    |
| <b>2b</b>                      | -1361.750857                              | -1361.354982                              | -1698.170667                                                    |
| <b>TS-2b-3b</b>                | -1361.744437                              | -1361.349049                              | -1698.163557                                                    |
| <b>3b</b>                      | -1361.755117                              | -1361.359682                              | -1698.174062                                                    |
| <b>TS-3b-4b</b>                | -1361.701942                              | -1361.314568                              | -1698.120922                                                    |
| <b>TS-3-4-OH<sub>2</sub>-b</b> | -1438.153973                              | -1437.743244                              | -1774.626866                                                    |
| <b>TS-3-4-THF-b</b>            | -1594.178357                              | -1593.682332                              | -1930.685657                                                    |
| <b>4b + N<sub>2</sub></b>      | -1361.835250                              | -1361.446815                              | -1698.260860                                                    |
| <b>TS-1b-2c</b>                | -1361.691213                              | -1361.303696                              | -1698.103418                                                    |
| <b>2c</b>                      | -1361.741680                              | -1361.346638                              | -1698.173557                                                    |
| <b>TS-1-2d</b>                 | -1361.686499                              | -1361.299174                              | -1698.100007                                                    |
| <b>2d</b>                      | -1361.831591                              | -1361.436126                              | -1698.250650                                                    |
| <b>TS-1-5</b>                  | -1361.676495                              | -1361.282872                              | -1698.103096                                                    |
| <b>5</b>                       | -1361.713785                              | -1361.320041                              | -1698.138157                                                    |
| <b>TS-5-6</b>                  | -1361.713371                              | -1361.318623                              | -1698.135348                                                    |
| <b>6</b>                       | -1361.716408                              | -1361.320888                              | -1698.137760                                                    |
| <b>TS-4b-6</b>                 | -1361.685224                              | -1361.296878                              | -1698.109106                                                    |
| <b>TS-1b-5b</b>                | -1361.670462                              | -1361.278386                              | -1698.097493                                                    |
| <b>5b</b>                      | -1361.714536                              | -1361.320310                              | -1698.139327                                                    |
| <b>TS-5b-6b</b>                | -1361.713817                              | -1361.318396                              | -1698.136456                                                    |
| <b>6b</b>                      | -1361.727886                              | -1361.331373                              | -1698.147478                                                    |

|                                                    |              |              |              |
|----------------------------------------------------|--------------|--------------|--------------|
| <b>TS-4-6b</b>                                     | -1361.686063 | -1361.297124 | -1698.110919 |
| <b>C1: (P<sup>CF3</sup>N<sup>CF3</sup>N)-Ru-H</b>  |              |              |              |
| <b>1</b>                                           | -1850.976846 | -1850.59951  | -2187.787988 |
| <b>1<sup>+</sup></b>                               | -1850.173125 | -1849.803300 | -2187.043046 |
| <b>TS-1-2</b>                                      | -2035.598630 | -2035.216043 | -2372.493412 |
| <b>TS-3-4</b>                                      | -2035.588764 | -2035.206933 | -2372.488753 |
| <b>C2: (P<sup>CF3</sup>NN)-Ru-H</b>                |              |              |              |
| <b>1</b>                                           | -1513.952517 | -1513.573328 | -1850.607073 |
| <b>1<sup>+</sup></b>                               | -1513.154242 | -1512.782303 | -1849.865128 |
| <b>TS-1-2</b>                                      | -1698.574853 | -1698.190510 | -2035.313161 |
| <b>TS-3-4</b>                                      | -1698.565036 | -1698.181282 | -2035.308550 |
| <b>C3: (PN<sup>CF3</sup>N)-Ru-H</b>                |              |              |              |
| <b>1</b>                                           | -1513.947804 | -1513.568055 | -1850.601204 |
| <b>1<sup>+</sup></b>                               | -1513.151224 | -1512.779332 | -1849.860861 |
| <b>TS-1-2</b>                                      | -1698.570297 | -1698.185900 | -2035.307290 |
| <b>TS-3-4</b>                                      | -1698.560379 | -1698.176589 | -2035.302632 |
| <b>C5: (P<sup>CH3</sup>NN)-Ru-H</b>                |              |              |              |
| <b>1</b>                                           | -1216.240843 | -1215.834182 | -1552.757351 |
| <b>1<sup>+</sup></b>                               | -1215.451886 | -1215.052567 | -1552.021086 |
| <b>TS-1-2</b>                                      | -1400.864128 | -1400.452246 | -1737.463945 |
| <b>TS-3-4</b>                                      | -1400.854288 | -1400.443127 | -1737.45966  |
| <b>C6: (PN<sup>CH3</sup>N)-Ru-H</b>                |              |              |              |
| <b>1</b>                                           | -1216.241681 | -1215.835729 | -1552.758306 |
| <b>1<sup>+</sup></b>                               | -1215.452962 | -1215.054682 | -1552.021097 |
| <b>TS-1-2</b>                                      | -1400.864974 | -1400.454456 | -1737.465119 |
| <b>TS-3-4</b>                                      | -1400.855148 | -1400.445154 | -1737.460670 |
| <b>C7: (P<sup>CH3</sup>N<sup>CH3</sup>N)-Ru-H</b>  |              |              |              |
| <b>1</b>                                           | -1255.559771 | -1255.128396 | -1592.095785 |
| <b>1<sup>+</sup></b>                               | -1254.772981 | -1254.349159 | -1591.359732 |
| <b>TS-1-2</b>                                      | -1440.183250 | -1439.747106 | -1776.802770 |
| <b>TS-3-4</b>                                      | -1440.173436 | -1439.737828 | -1776.798416 |
| <b>C8: (PNC)-Ru-H</b>                              |              |              |              |
| <b>1</b>                                           | -1177.086698 | -1361.333714 | -1513.429164 |
| <b>1<sup>+</sup></b>                               | -1176.287746 | -1361.322393 | -1512.687162 |
| <b>TS-1-2</b>                                      | -1361.723160 | -1176.702347 | -1698.135827 |
| <b>TS-3-4</b>                                      | -1361.711472 | -1175.911987 | -1698.128442 |
| <b>C9: (P<sup>CH3</sup>N<sup>CH3</sup>C)-Ru-H</b>  |              |              |              |
| <b>1</b>                                           | -1255.734791 | -1255.302448 | -1592.105303 |
| <b>1<sup>+</sup></b>                               | -1254.940848 | -1254.516589 | -1591.366038 |
| <b>TS-1-2</b>                                      | -1440.371736 | -1439.934039 | -1776.812405 |
| <b>TS-3-4</b>                                      | -1440.360174 | -1439.923261 | -1776.805252 |
| <b>C10: (P<sup>CF3</sup>N<sup>CF3</sup>N)-Ru-H</b> |              |              |              |
| <b>1</b>                                           | -1851.155122 | -1850.774037 | -2187.799190 |
| <b>1<sup>+</sup></b>                               | -1850.341863 | -1849.969473 | -2187.048895 |
| <b>TS-1-2</b>                                      | -2035.790170 | -2035.404167 | -2372.504742 |

|               |              |              |              |
|---------------|--------------|--------------|--------------|
| <b>TS-3-4</b> | -2035.778013 | -2035.392503 | -2372.496714 |
|---------------|--------------|--------------|--------------|

**1<sup>+</sup>** stands for the cationic complex without hydride in the computation of hydricity (Scheme S3).

**Table S3.** SMD(THF)-B3LYP-GD3BJ/BS2 computed energies (in Hartrees) of various species.

| Species                        | E            | G            |
|--------------------------------|--------------|--------------|
| <b>N<sub>2</sub>O</b>          | -184.730065  | -184.740340  |
| <b>H<sub>2</sub>O</b>          | -76.468140   | -76.464831   |
| <b>1</b>                       | -1513.422084 | -1513.041319 |
| <b>TS-1-2</b>                  | -1698.128890 | -1697.744655 |
| <b>TS-2-3</b>                  | -1698.167004 | -1697.773734 |
| <b>TS-3-4</b>                  | -1698.124980 | -1697.738864 |
| <b>TS-1-2b</b>                 | -1698.125180 | -1697.739675 |
| <b>TS-2b-3b</b>                | -1698.166366 | -1697.772165 |
| <b>TS-1-2d</b>                 | -1698.102479 | -1697.716775 |
| <b>TS-3-4-OH<sub>2</sub></b>   | -1774.633290 | -1774.223726 |
| <b>TS-3-4-OH<sub>2</sub>-b</b> | -1774.629891 | -1774.219387 |

**Table S4.** Cartesian coordinates of optimized various species.

|     |                               |           |                           |           |           |
|-----|-------------------------------|-----------|---------------------------|-----------|-----------|
| 3   |                               | C         | 0.000000                  | -1.171004 | 0.430813  |
| N20 | el energy= -184.658970633     | H         | -0.990120                 | 1.653365  | 0.482290  |
| N   | 0.000000 0.000000 -1.203650   | H         | 0.742863                  | 1.876342  | 0.825298  |
| N   | 0.000000 0.000000 -0.070912   | H         | -0.108083                 | 1.366691  | -1.762259 |
| O   | 0.000000 0.000000 1.115242    | H         | 1.394189                  | 0.641374  | -1.152855 |
|     |                               | H         | -1.394189                 | -0.641374 | -1.152855 |
| 2   |                               | H         | 0.108083                  | -1.366691 | -1.762259 |
| N2  | el energy= -109.522713860     | H         | 0.990120                  | -1.653365 | 0.482290  |
| N   | 0.000000 0.000000 0.551536    | H         | -0.742863                 | -1.876342 | 0.825298  |
| N   | 0.000000 0.000000 -0.551536   |           |                           |           |           |
|     |                               | 54        |                           |           |           |
| 3   |                               | Complex-1 | el energy= -1177.07649613 |           |           |
| H2O | el energy= -76.4040457810     | Ru        | -0.357659                 | -0.741267 | 0.023784  |
| O   | 0.000000 0.000000 0.117189    | H         | -0.354653                 | -0.587322 | -1.612569 |
| H   | 0.000000 0.767693 -0.468755   | P         | 1.785199                  | 0.282155  | -0.057707 |
| H   | 0.000000 -0.767693 -0.468755  | O         | 0.625904                  | -3.574869 | -0.504812 |
|     |                               | O         | -0.837724                 | -0.996328 | 3.105193  |
| 13  |                               | N         | -2.509151                 | -0.847091 | -0.224041 |
| THF | el energy= -232.458408733     | N         | -0.973063                 | 1.280460  | 0.131099  |
| O   | 0.000000 0.000000 1.251234    | C         | -3.214889                 | -1.968893 | -0.436610 |
| C   | 0.000000 1.171004 0.430813    | H         | -2.639513                 | -2.888848 | -0.452917 |
| C   | 0.309271 0.703178 -0.997047   | C         | -4.591145                 | -1.966379 | -0.628334 |
| C   | -0.309271 -0.703178 -0.997047 | H         | -5.116394                 | -2.901390 | -0.798121 |

|   |           |           |           |
|---|-----------|-----------|-----------|
| C | -5.260978 | -0.740885 | -0.598550 |
| H | -6.336870 | -0.691948 | -0.746822 |
| C | -4.532373 | 0.421654  | -0.378950 |
| H | -5.031207 | 1.383935  | -0.359456 |
| C | -3.144792 | 0.354798  | -0.190133 |
| C | -2.297496 | 1.542533  | 0.043432  |
| C | -2.804989 | 2.827513  | 0.170121  |
| H | -3.867228 | 3.030724  | 0.109982  |
| C | -1.880986 | 3.875972  | 0.398680  |
| H | -2.244821 | 4.895897  | 0.506064  |
| C | -0.537210 | 3.617222  | 0.481755  |
| H | 0.176420  | 4.418965  | 0.652068  |
| C | -0.032939 | 2.275658  | 0.339587  |
| C | 1.317446  | 1.942381  | 0.393859  |
| H | 2.053284  | 2.736141  | 0.485964  |
| C | 2.522093  | 0.362474  | -1.839779 |
| C | 3.920776  | 1.001658  | -1.878918 |
| H | 3.932894  | 1.981436  | -1.386240 |
| H | 4.211707  | 1.159346  | -2.927204 |
| H | 4.689594  | 0.370992  | -1.422527 |
| C | 1.580856  | 1.262821  | -2.663354 |
| H | 0.550500  | 0.895832  | -2.644634 |
| H | 1.923897  | 1.273653  | -3.707651 |
| H | 1.582698  | 2.290410  | -2.285869 |
| C | 2.561558  | -1.034134 | -2.482060 |
| H | 3.201612  | -1.734239 | -1.936606 |
| H | 2.957197  | -0.953185 | -3.504763 |
| H | 1.557701  | -1.464250 | -2.542956 |
| C | 3.148023  | -0.272460 | 1.168888  |
| C | 4.159618  | 0.858169  | 1.440387  |
| H | 4.722965  | 1.156443  | 0.554350  |
| H | 4.884145  | 0.515442  | 2.192629  |
| H | 3.655485  | 1.743073  | 1.844033  |
| C | 3.866235  | -1.538959 | 0.675212  |
| H | 3.155100  | -2.335972 | 0.426979  |
| H | 4.522771  | -1.917445 | 1.471527  |
| H | 4.492491  | -1.352943 | -0.202296 |
| C | 2.460203  | -0.598037 | 2.505096  |
| H | 1.820003  | 0.226002  | 2.838427  |
| H | 3.227748  | -0.764765 | 3.273671  |
| H | 1.856467  | -1.506970 | 2.434704  |
| C | 0.238786  | -2.509230 | -0.279929 |
| C | -0.570285 | -0.890476 | 1.994081  |

53

Complex-1-no-hydride el energy= -  
1176.29006046

|    |           |           |           |
|----|-----------|-----------|-----------|
| Ru | -0.311246 | -0.674193 | 0.086993  |
| P  | 1.838005  | 0.336482  | -0.020898 |
| O  | 0.589944  | -3.591930 | -0.329843 |
| O  | -0.308908 | -1.014065 | 3.057397  |
| N  | -2.449660 | -0.830726 | -0.234788 |
| N  | -0.910323 | 1.295922  | 0.109298  |
| C  | -3.148407 | -1.970647 | -0.406501 |
| H  | -2.564574 | -2.883767 | -0.460823 |
| C  | -4.531398 | -1.988643 | -0.509570 |
| H  | -5.051907 | -2.930122 | -0.653352 |
| C  | -5.219662 | -0.774211 | -0.421096 |
| H  | -6.303547 | -0.746342 | -0.492612 |
| C  | -4.503273 | 0.402543  | -0.237785 |
| H  | -5.024182 | 1.350247  | -0.163263 |
| C  | -3.106111 | 0.361694  | -0.147632 |
| C  | -2.259696 | 1.551218  | 0.036722  |
| C  | -2.752512 | 2.833228  | 0.119474  |
| H  | -3.815045 | 3.032128  | 0.049752  |
| C  | -1.838555 | 3.909791  | 0.300298  |
| H  | -2.218815 | 4.924633  | 0.380125  |
| C  | -0.496408 | 3.669900  | 0.368289  |
| H  | 0.213877  | 4.480178  | 0.503458  |
| C  | 0.019051  | 2.328169  | 0.255352  |
| C  | 1.369287  | 2.027280  | 0.278335  |
| H  | 2.103747  | 2.806719  | 0.449943  |
| C  | 2.213399  | 0.176490  | -1.892087 |
| C  | 3.076296  | 1.348009  | -2.388353 |
| H  | 2.606049  | 2.311002  | -2.164055 |
| H  | 3.190916  | 1.269599  | -3.477914 |
| H  | 4.078972  | 1.342756  | -1.952368 |
| C  | 0.832189  | 0.262775  | -2.581447 |
| H  | 0.187156  | -0.603403 | -2.336704 |
| H  | 0.958340  | 0.234071  | -3.672215 |
| H  | 0.302323  | 1.187197  | -2.331259 |
| C  | 2.877328  | -1.164393 | -2.236991 |
| H  | 3.888839  | -1.242450 | -1.827553 |
| H  | 2.962536  | -1.248477 | -3.328510 |
| H  | 2.297633  | -2.024935 | -1.886654 |
| C  | 3.282591  | -0.132080 | 1.101381  |
| C  | 4.601071  | 0.476461  | 0.588581  |
| H  | 4.925683  | 0.032963  | -0.357257 |
| H  | 5.388900  | 0.284008  | 1.328198  |
| H  | 4.531524  | 1.562944  | 0.459050  |

|   |           |           |           |
|---|-----------|-----------|-----------|
| C | 3.394553  | -1.664583 | 1.193924  |
| H | 2.496386  | -2.106341 | 1.639457  |
| H | 4.242840  | -1.921366 | 1.840977  |
| H | 3.566249  | -2.138750 | 0.223288  |
| C | 2.973817  | 0.440810  | 2.498833  |
| H | 2.922848  | 1.533664  | 2.492634  |
| H | 3.776860  | 0.140312  | 3.184058  |
| H | 2.034255  | 0.058894  | 2.909242  |
| C | 0.254845  | -2.509220 | -0.168906 |
| C | -0.271396 | -0.898112 | 1.916521  |

57

Complex-1 + N2O      el energy= -  
1361.74647122

|    |           |           |           |
|----|-----------|-----------|-----------|
| Ru | 0.169816  | -0.429272 | -0.567479 |
| H  | 0.363645  | -0.912701 | 0.985279  |
| P  | -1.995495 | 0.216184  | 0.159810  |
| O  | -0.518888 | -3.346264 | -1.113785 |
| O  | 0.191085  | 0.599057  | -3.523469 |
| N  | 2.336601  | -0.374667 | -0.615718 |
| N  | 0.632823  | 1.524572  | 0.094005  |
| C  | 3.135020  | -1.399677 | -0.956346 |
| H  | 2.627806  | -2.305067 | -1.272018 |
| C  | 4.520949  | -1.323894 | -0.893662 |
| H  | 5.123205  | -2.183312 | -1.172247 |
| C  | 5.099889  | -0.127035 | -0.463800 |
| H  | 6.180116  | -0.026102 | -0.394781 |
| C  | 4.275828  | 0.937643  | -0.121374 |
| H  | 4.704193  | 1.871805  | 0.223241  |
| C  | 2.883172  | 0.800678  | -0.202371 |
| C  | 1.937666  | 1.876637  | 0.157824  |
| C  | 2.339721  | 3.151859  | 0.527175  |
| H  | 3.385197  | 3.432251  | 0.566293  |
| C  | 1.327743  | 4.091352  | 0.840817  |
| H  | 1.607412  | 5.102413  | 1.129990  |
| C  | 0.004385  | 3.736703  | 0.788358  |
| H  | -0.775621 | 4.452025  | 1.035262  |
| C  | -0.388705 | 2.402767  | 0.414096  |
| C  | -1.709168 | 1.963624  | 0.368584  |
| H  | -2.499626 | 2.636028  | 0.689550  |
| C  | -2.448023 | -0.498782 | 1.895774  |
| C  | -3.866852 | -0.112802 | 2.348107  |
| H  | -4.027896 | 0.970815  | 2.296415  |
| H  | -4.001476 | -0.413490 | 3.396844  |
| H  | -4.648950 | -0.610774 | 1.767175  |

|   |           |           |           |
|---|-----------|-----------|-----------|
| C | -1.460324 | 0.126114  | 2.900609  |
| H | -0.419785 | -0.056312 | 2.616614  |
| H | -1.630727 | -0.321022 | 3.890272  |
| H | -1.604295 | 1.208450  | 2.978959  |
| C | -2.283920 | -2.027810 | 1.921408  |
| H | -2.940268 | -2.536999 | 1.209059  |
| H | -2.531748 | -2.403239 | 2.924743  |
| H | -1.251968 | -2.315226 | 1.700066  |
| C | -3.490446 | 0.023133  | -1.019447 |
| C | -4.606483 | 1.033918  | -0.691108 |
| H | -5.045285 | 0.887140  | 0.297437  |
| H | -5.413210 | 0.926947  | -1.429997 |
| H | -4.232326 | 2.061651  | -0.754728 |
| C | -4.034069 | -1.414881 | -1.003157 |
| H | -3.239361 | -2.148520 | -1.184224 |
| H | -4.779454 | -1.530252 | -1.802807 |
| H | -4.526358 | -1.668885 | -0.059705 |
| C | -2.995572 | 0.335860  | -2.441522 |
| H | -2.470435 | 1.296427  | -2.481756 |
| H | -3.858887 | 0.391226  | -3.119137 |
| H | -2.328533 | -0.446014 | -2.814791 |
| C | -0.249456 | -2.237286 | -0.935474 |
| C | 0.097767  | 0.226469  | -2.442020 |
| N | 2.773622  | -1.001153 | 2.584209  |
| N | 2.471119  | -1.991035 | 2.128054  |
| O | 2.160464  | -3.028497 | 1.645035  |

57

Complex-2      el energy= -1361.74681755

|    |           |           |           |
|----|-----------|-----------|-----------|
| Ru | 0.260545  | -0.649995 | -0.330150 |
| H  | 1.299521  | 0.559779  | 1.957289  |
| P  | -1.903639 | 0.311064  | 0.059050  |
| O  | -0.772388 | -3.482057 | -0.881671 |
| O  | 0.584108  | 0.124626  | -3.245926 |
| N  | 2.434971  | -0.782665 | -0.317245 |
| N  | 0.889296  | 1.346837  | -0.006829 |
| C  | 3.131101  | -1.928210 | -0.319213 |
| H  | 2.544053  | -2.837039 | -0.396982 |
| C  | 4.515929  | -1.956795 | -0.211220 |
| H  | 5.040206  | -2.907303 | -0.214705 |
| C  | 5.195624  | -0.742987 | -0.086008 |
| H  | 6.278155  | -0.722173 | 0.010463  |
| C  | 4.471356  | 0.442866  | -0.064362 |
| H  | 4.975564  | 1.392816  | 0.071784  |
| C  | 3.076359  | 0.406975  | -0.178410 |

|   |           |           |           |
|---|-----------|-----------|-----------|
| C | 2.221505  | 1.610285  | -0.111542 |
| C | 2.711224  | 2.901938  | -0.110631 |
| H | 3.771230  | 3.106755  | -0.199087 |
| C | 1.774580  | 3.961889  | 0.005523  |
| H | 2.131408  | 4.989232  | 0.027979  |
| C | 0.432100  | 3.703540  | 0.083361  |
| H | -0.288742 | 4.512643  | 0.162571  |
| C | -0.065994 | 2.351894  | 0.035988  |
| C | -1.417649 | 2.027029  | 0.027830  |
| H | -2.149421 | 2.820765  | 0.145475  |
| C | -2.637158 | -0.093304 | 1.790469  |
| C | -4.050532 | 0.481272  | 1.988951  |
| H | -4.086301 | 1.560267  | 1.794791  |
| H | -4.340831 | 0.329793  | 3.037890  |
| H | -4.806587 | -0.012117 | 1.371777  |
| C | -1.719804 | 0.578132  | 2.827525  |
| H | -0.699545 | 0.204281  | 2.770575  |
| H | -2.099024 | 0.347592  | 3.832647  |
| H | -1.702630 | 1.666317  | 2.706052  |
| C | -2.635389 | -1.614736 | 2.027453  |
| H | -3.242959 | -2.158082 | 1.297038  |
| H | -3.057834 | -1.820187 | 3.021516  |
| H | -1.613562 | -2.004295 | 2.008274  |
| C | -3.267192 | 0.086263  | -1.272339 |
| C | -4.279427 | 1.249048  | -1.224077 |
| H | -4.830825 | 1.306298  | -0.284598 |
| H | -5.013384 | 1.111803  | -2.030276 |
| H | -3.778988 | 2.209016  | -1.391571 |
| C | -3.983476 | -1.266691 | -1.127102 |
| H | -3.274534 | -2.102871 | -1.122322 |
| H | -4.656063 | -1.410254 | -1.984359 |
| H | -4.591673 | -1.329888 | -0.221023 |
| C | -2.604169 | 0.129355  | -2.658095 |
| H | -1.980883 | 1.021148  | -2.780154 |
| H | -3.387429 | 0.159078  | -3.427847 |
| H | -1.997026 | -0.761071 | -2.845714 |
| C | -0.370756 | -2.427506 | -0.670045 |
| C | 0.342375  | -0.171499 | -2.162167 |
| N | 1.749739  | -0.016678 | 2.693440  |
| N | 1.366358  | -1.196377 | 2.592106  |
| O | 0.503600  | -1.533672 | 1.632812  |

57

Complex-3 el energy= -1361.75728715

|    |          |           |           |
|----|----------|-----------|-----------|
| Ru | 0.289449 | -0.498644 | -0.444169 |
|----|----------|-----------|-----------|

|   |           |           |           |
|---|-----------|-----------|-----------|
| H | 1.661964  | -1.676131 | 3.389509  |
| P | -1.916740 | 0.304226  | 0.067522  |
| O | -0.562964 | -3.374299 | -1.088230 |
| O | 0.405896  | 0.396270  | -3.343739 |
| N | 2.461643  | -0.515951 | -0.506376 |
| N | 0.788976  | 1.472766  | 0.063342  |
| C | 3.223244  | -1.594953 | -0.732767 |
| H | 2.695706  | -2.490727 | -1.040644 |
| C | 4.603162  | -1.580845 | -0.563480 |
| H | 5.181431  | -2.479475 | -0.754035 |
| C | 5.202830  | -0.398760 | -0.126590 |
| H | 6.277193  | -0.348316 | 0.031774  |
| C | 4.409430  | 0.717332  | 0.117416  |
| H | 4.854089  | 1.637955  | 0.478159  |
| C | 3.025488  | 0.644083  | -0.081410 |
| C | 2.106999  | 1.778395  | 0.155247  |
| C | 2.541163  | 3.065528  | 0.420595  |
| H | 3.594883  | 3.310341  | 0.475415  |
| C | 1.555354  | 4.070907  | 0.587830  |
| H | 1.864826  | 5.092551  | 0.798162  |
| C | 0.223355  | 3.768981  | 0.482378  |
| H | -0.535671 | 4.536439  | 0.606882  |
| C | -0.209018 | 2.423213  | 0.204896  |
| C | -1.543742 | 2.046913  | 0.081733  |
| H | -2.316827 | 2.786280  | 0.269892  |
| C | -2.508111 | -0.188098 | 1.831443  |
| C | -3.944083 | 0.272311  | 2.135495  |
| H | -4.072248 | 1.348123  | 1.964777  |
| H | -4.150553 | 0.084826  | 3.198665  |
| H | -4.702376 | -0.267338 | 1.560376  |
| C | -1.573051 | 0.536823  | 2.821498  |
| H | -0.525583 | 0.281801  | 2.651288  |
| H | -1.839736 | 0.222665  | 3.841030  |
| H | -1.692810 | 1.623134  | 2.755366  |
| C | -2.383005 | -1.708881 | 2.029549  |
| H | -3.013038 | -2.278501 | 1.339230  |
| H | -2.699169 | -1.966879 | 3.050337  |
| H | -1.346530 | -2.028777 | 1.907421  |
| C | -3.331888 | 0.019793  | -1.188269 |
| C | -4.416639 | 1.106750  | -1.048294 |
| H | -4.916532 | 1.096307  | -0.078454 |
| H | -5.183814 | 0.942811  | -1.817846 |
| H | -3.992657 | 2.103974  | -1.209698 |
| C | -3.942534 | -1.383489 | -1.037788 |
| H | -3.177709 | -2.166997 | -1.093206 |

|   |           |           |           |
|---|-----------|-----------|-----------|
| H | -4.652123 | -1.556731 | -1.858943 |
| H | -4.491326 | -1.507732 | -0.100437 |
| C | -2.751641 | 0.141315  | -2.606634 |
| H | -2.202253 | 1.079052  | -2.739099 |
| H | -3.576545 | 0.128743  | -3.332177 |
| H | -2.091284 | -0.696826 | -2.847753 |
| C | -0.220287 | -2.306659 | -0.840202 |
| C | 0.248261  | 0.055765  | -2.257355 |
| N | 1.803018  | -2.497300 | 2.760763  |
| N | 1.309431  | -2.231510 | 1.652178  |
| O | 0.735925  | -1.015498 | 1.554908  |

55

Complex-4      el energy= -1252.30547181

|    |           |           |           |
|----|-----------|-----------|-----------|
| Ru | -0.344475 | -0.710485 | 0.060603  |
| H  | -1.093134 | 0.038369  | -2.216579 |
| P  | 1.821744  | 0.303763  | -0.027872 |
| O  | 0.665711  | -3.590919 | -0.132529 |
| O  | -0.797202 | -0.689247 | 3.075331  |
| N  | -2.528451 | -0.839558 | -0.054275 |
| N  | -0.969450 | 1.302061  | 0.092918  |
| C  | -3.228232 | -1.971363 | -0.206143 |
| H  | -2.649515 | -2.889139 | -0.182373 |
| C  | -4.606206 | -1.979014 | -0.391101 |
| H  | -5.133617 | -2.920628 | -0.509465 |
| C  | -5.273878 | -0.752703 | -0.427334 |
| H  | -6.350054 | -0.711837 | -0.576235 |
| C  | -4.545513 | 0.422358  | -0.279887 |
| H  | -5.043273 | 1.384510  | -0.324618 |
| C  | -3.158228 | 0.362368  | -0.089844 |
| C  | -2.301290 | 1.559618  | 0.059227  |
| C  | -2.804208 | 2.845370  | 0.159924  |
| H  | -3.868922 | 3.043998  | 0.144277  |
| C  | -1.872655 | 3.905031  | 0.309020  |
| H  | -2.235152 | 4.927953  | 0.387073  |
| C  | -0.528080 | 3.651274  | 0.359410  |
| H  | 0.188727  | 4.459385  | 0.477537  |
| C  | -0.023638 | 2.303535  | 0.263583  |
| C  | 1.325895  | 1.979956  | 0.332029  |
| H  | 2.055235  | 2.782776  | 0.392420  |
| C  | 2.625645  | 0.271384  | -1.778352 |
| C  | 4.072815  | 0.791328  | -1.805144 |
| H  | 4.152142  | 1.804172  | -1.391632 |
| H  | 4.399748  | 0.842651  | -2.853294 |
| H  | 4.779216  | 0.141900  | -1.280242 |

|   |           |           |           |
|---|-----------|-----------|-----------|
| C | 1.783874  | 1.204936  | -2.669388 |
| H | 0.751804  | 0.854128  | -2.702642 |
| H | 2.194469  | 1.177591  | -3.689147 |
| H | 1.812779  | 2.239515  | -2.311350 |
| C | 2.550699  | -1.158357 | -2.345818 |
| H | 3.060716  | -1.892745 | -1.713018 |
| H | 3.039266  | -1.179775 | -3.331108 |
| H | 1.503184  | -1.446981 | -2.473322 |
| C | 3.132288  | -0.196180 | 1.278212  |
| C | 4.161260  | 0.932760  | 1.490196  |
| H | 4.751873  | 1.155357  | 0.600825  |
| H | 4.859363  | 0.631424  | 2.283742  |
| H | 3.666119  | 1.853881  | 1.817321  |
| C | 3.829834  | -1.511222 | 0.891921  |
| H | 3.104835  | -2.314365 | 0.715159  |
| H | 4.481313  | -1.830432 | 1.717728  |
| H | 4.454450  | -1.415753 | -0.000153 |
| C | 2.420633  | -0.409527 | 2.624063  |
| H | 1.784513  | 0.442894  | 2.884851  |
| H | 3.176257  | -0.521933 | 3.413859  |
| H | 1.813373  | -1.318563 | 2.621082  |
| C | 0.273958  | -2.511606 | -0.057196 |
| C | -0.502594 | -0.714513 | 1.962227  |
| O | -0.535255 | -0.722783 | -2.004965 |

57

Complex-4 + N2      el energy= -  
1361.83609049

|    |           |           |           |
|----|-----------|-----------|-----------|
| Ru | 0.160060  | -0.599401 | -0.362178 |
| H  | 1.077768  | -0.151889 | 1.924012  |
| P  | -2.021739 | 0.244300  | 0.145512  |
| O  | -0.689684 | -3.530328 | -0.575021 |
| O  | 0.269959  | -0.047325 | -3.358442 |
| N  | 2.345421  | -0.612104 | -0.533333 |
| N  | 0.695051  | 1.419457  | -0.094160 |
| C  | 3.103398  | -1.702639 | -0.704058 |
| H  | 2.564459  | -2.637757 | -0.817909 |
| C  | 4.492873  | -1.651792 | -0.724572 |
| H  | 5.067989  | -2.562038 | -0.863126 |
| C  | 5.110008  | -0.410656 | -0.552948 |
| H  | 6.193806  | -0.325596 | -0.556469 |
| C  | 4.322788  | 0.719072  | -0.363625 |
| H  | 4.784338  | 1.687829  | -0.209597 |
| C  | 2.925716  | 0.602358  | -0.358064 |
| C  | 2.010436  | 1.747867  | -0.159222 |

|   |           |           |           |
|---|-----------|-----------|-----------|
| C | 2.446250  | 3.057286  | -0.053066 |
| H | 3.496443  | 3.315597  | -0.112238 |
| C | 1.462984  | 4.065271  | 0.120083  |
| H | 1.773325  | 5.104201  | 0.210254  |
| C | 0.133304  | 3.742856  | 0.170532  |
| H | -0.623404 | 4.512033  | 0.299225  |
| C | -0.302697 | 2.373225  | 0.051516  |
| C | -1.636662 | 1.985466  | 0.078216  |
| H | -2.398239 | 2.738483  | 0.260269  |
| C | -2.631148 | -0.177911 | 1.925707  |
| C | -4.093984 | 0.215819  | 2.192662  |
| H | -4.272851 | 1.281068  | 2.002392  |
| H | -4.308396 | 0.036312  | 3.255623  |
| H | -4.816334 | -0.369512 | 1.616868  |
| C | -1.755064 | 0.628890  | 2.903132  |
| H | -0.708106 | 0.350955  | 2.780952  |
| H | -2.062381 | 0.384201  | 3.930244  |
| H | -1.871445 | 1.707660  | 2.754487  |
| C | -2.416693 | -1.679953 | 2.189312  |
| H | -2.947353 | -2.316011 | 1.472331  |
| H | -2.797328 | -1.927520 | 3.191150  |
| H | -1.346917 | -1.906720 | 2.159910  |
| C | -3.446152 | -0.073693 | -1.097694 |
| C | -4.542739 | 1.003303  | -0.971582 |
| H | -5.044313 | 1.003139  | -0.003365 |
| H | -5.307474 | 0.821830  | -1.739738 |
| H | -4.127975 | 2.002227  | -1.147442 |
| C | -4.033411 | -1.484035 | -0.921232 |
| H | -3.256102 | -2.254245 | -0.989612 |
| H | -4.759862 | -1.676222 | -1.723496 |
| H | -4.554786 | -1.612726 | 0.030843  |
| C | -2.879576 | 0.033049  | -2.522843 |
| H | -2.306045 | 0.955600  | -2.662680 |
| H | -3.712717 | 0.040540  | -3.239165 |
| H | -2.244622 | -0.821512 | -2.770017 |
| C | -0.360240 | -2.430424 | -0.498557 |
| C | 0.100321  | -0.275076 | -2.242180 |
| N | 3.409264  | -0.643711 | 2.660078  |
| N | 3.887557  | -1.634276 | 2.583578  |
| O | 0.591307  | -0.935600 | 1.635614  |

57

ts-1-2 el energy= -1361.71437712

|    |           |           |           |
|----|-----------|-----------|-----------|
| Ru | -0.278734 | -0.454059 | 0.441434  |
| H  | -0.538781 | -0.742093 | -1.302763 |

|   |           |           |           |
|---|-----------|-----------|-----------|
| P | 1.921687  | 0.318405  | -0.068183 |
| O | 0.589935  | -3.327878 | 1.048911  |
| O | -0.472287 | 0.369568  | 3.388513  |
| N | -2.444076 | -0.469164 | 0.404532  |
| N | -0.764090 | 1.521788  | -0.090099 |
| C | -3.221363 | -1.539337 | 0.637662  |
| H | -2.699571 | -2.451911 | 0.899526  |
| C | -4.605056 | -1.494162 | 0.520728  |
| H | -5.192333 | -2.386741 | 0.712788  |
| C | -5.200245 | -0.288853 | 0.142198  |
| H | -6.279050 | -0.213747 | 0.030822  |
| C | -4.395769 | 0.819008  | -0.096913 |
| H | -4.837410 | 1.760832  | -0.401896 |
| C | -3.005787 | 0.715599  | 0.041895  |
| C | -2.077950 | 1.841729  | -0.189553 |
| C | -2.498406 | 3.131568  | -0.469482 |
| H | -3.548973 | 3.385830  | -0.538625 |
| C | -1.502305 | 4.123867  | -0.645541 |
| H | -1.800146 | 5.146892  | -0.865678 |
| C | -0.173277 | 3.806559  | -0.540761 |
| H | 0.594347  | 4.563846  | -0.675035 |
| C | 0.244049  | 2.458616  | -0.253439 |
| C | 1.574684  | 2.064672  | -0.142075 |
| H | 2.357425  | 2.791270  | -0.339747 |
| C | 2.522533  | -0.233891 | -1.817345 |
| C | 3.975949  | 0.173979  | -2.116262 |
| H | 4.133470  | 1.249714  | -1.973660 |
| H | 4.193455  | -0.049899 | -3.170161 |
| H | 4.708250  | -0.370643 | -1.513525 |
| C | 1.632142  | 0.496870  | -2.841610 |
| H | 0.567191  | 0.326065  | -2.678932 |
| H | 1.877891  | 0.128196  | -3.847271 |
| H | 1.809145  | 1.576800  | -2.816183 |
| C | 2.362594  | -1.754811 | -1.984293 |
| H | 2.975446  | -2.320995 | -1.275671 |
| H | 2.675810  | -2.044505 | -2.997170 |
| H | 1.323291  | -2.067779 | -1.855119 |
| C | 3.329958  | 0.060022  | 1.200885  |
| C | 4.435907  | 1.120705  | 1.032154  |
| H | 4.947882  | 1.063334  | 0.070242  |
| H | 5.190840  | 0.974164  | 1.817227  |
| H | 4.028551  | 2.131116  | 1.148769  |
| C | 3.913235  | -1.359990 | 1.108973  |
| H | 3.131286  | -2.124295 | 1.185480  |
| H | 4.611810  | -1.517532 | 1.942738  |



|   |           |           |           |
|---|-----------|-----------|-----------|
| H | 4.468640  | -1.530511 | 0.182458  |
| C | 2.734776  | 0.245658  | 2.606592  |
| H | 2.180099  | 1.186635  | 2.688277  |
| H | 3.551320  | 0.269313  | 3.341269  |
| H | 2.073564  | -0.582350 | 2.876732  |
| C | 0.214197  | -2.273830 | 0.778719  |
| C | -0.294900 | 0.049730  | 2.299487  |
| N | -1.286517 | -1.169809 | -2.376351 |
| N | -1.567630 | -2.303007 | -2.174563 |
| O | -1.419902 | -3.165365 | -1.315174 |

57

ts-2-3      el energy= -1361.74460491

|    |           |           |           |
|----|-----------|-----------|-----------|
| Ru | 0.253554  | -0.691333 | -0.226095 |
| H  | 1.424015  | 1.051975  | 2.242883  |
| P  | -1.927662 | 0.307576  | -0.003203 |
| O  | -0.722365 | -3.594514 | -0.110960 |
| O  | 0.555215  | -0.551349 | -3.232696 |
| N  | 2.424335  | -0.820696 | -0.255995 |
| N  | 0.860870  | 1.322686  | -0.221446 |
| C  | 3.133071  | -1.956700 | -0.182970 |
| H  | 2.555200  | -2.874729 | -0.175748 |
| C  | 4.519410  | -1.965603 | -0.104685 |
| H  | 5.052585  | -2.908912 | -0.040236 |
| C  | 5.188956  | -0.739834 | -0.096309 |
| H  | 6.273031  | -0.701525 | -0.026444 |
| C  | 4.453518  | 0.436673  | -0.163714 |
| H  | 4.953120  | 1.397950  | -0.132342 |
| C  | 3.056673  | 0.380753  | -0.240710 |
| C  | 2.194177  | 1.580121  | -0.288968 |
| C  | 2.683999  | 2.869227  | -0.387378 |
| H  | 3.746521  | 3.071298  | -0.442231 |
| C  | 1.743140  | 3.930259  | -0.423042 |
| H  | 2.098428  | 4.956459  | -0.487657 |
| C  | 0.398398  | 3.674650  | -0.382871 |
| H  | -0.325660 | 4.484018  | -0.417647 |
| C  | -0.095935 | 2.323071  | -0.303685 |
| C  | -1.447757 | 1.996584  | -0.306375 |
| H  | -2.180950 | 2.797912  | -0.301604 |
| C  | -2.673846 | 0.193619  | 1.770977  |
| C  | -4.110097 | 0.739451  | 1.855443  |
| H  | -4.179793 | 1.768335  | 1.482189  |
| H  | -4.408413 | 0.757142  | 2.912941  |
| H  | -4.841463 | 0.122786  | 1.325669  |
| C  | -1.798901 | 1.073278  | 2.684117  |

|   |           |           |           |
|---|-----------|-----------|-----------|
| H | -0.764878 | 0.728494  | 2.677184  |
| H | -2.180950 | 0.996669  | 3.711921  |
| H | -1.833410 | 2.124951  | 2.380265  |
| C | -2.624385 | -1.262894 | 2.269029  |
| H | -3.190110 | -1.947617 | 1.628625  |
| H | -3.070110 | -1.311705 | 3.273020  |
| H | -1.589523 | -1.608433 | 2.342255  |
| C | -3.280683 | -0.145662 | -1.284648 |
| C | -4.310363 | 0.993939  | -1.425629 |
| H | -4.874598 | 1.185943  | -0.512434 |
| H | -5.031761 | 0.723186  | -2.209072 |
| H | -3.820887 | 1.924597  | -1.733414 |
| C | -3.972294 | -1.471414 | -0.926027 |
| H | -3.246214 | -2.281787 | -0.789995 |
| H | -4.641134 | -1.762707 | -1.748043 |
| H | -4.578958 | -1.402957 | -0.019384 |
| C | -2.611112 | -0.312377 | -2.657888 |
| H | -1.983508 | 0.549076  | -2.909266 |
| H | -3.390239 | -0.396984 | -3.427748 |
| H | -2.007338 | -1.222800 | -2.705943 |
| C | -0.345478 | -2.511336 | -0.163502 |
| C | 0.320429  | -0.611078 | -2.108216 |
| N | 2.085193  | 0.369218  | 2.666738  |
| N | 1.644190  | -0.781956 | 2.506306  |
| O | 0.438139  | -0.895234 | 1.897599  |

57

ts-3-4      el energy= -1361.70294466

|    |           |           |           |
|----|-----------|-----------|-----------|
| Ru | 0.256350  | -0.538708 | -0.415806 |
| H  | 1.777226  | -0.657523 | 2.419815  |
| P  | -1.938717 | 0.288676  | 0.073309  |
| O  | -0.613068 | -3.448420 | -0.816874 |
| O  | 0.379279  | 0.177584  | -3.378925 |
| N  | 2.443894  | -0.550537 | -0.508360 |
| N  | 0.768450  | 1.461065  | -0.025892 |
| C  | 3.212339  | -1.628559 | -0.713633 |
| H  | 2.687065  | -2.537157 | -0.989647 |
| C  | 4.594270  | -1.600881 | -0.565440 |
| H  | 5.176881  | -2.501047 | -0.734852 |
| C  | 5.191373  | -0.399956 | -0.177863 |
| H  | 6.267183  | -0.336724 | -0.035065 |
| C  | 4.393524  | 0.719282  | 0.032512  |
| H  | 4.837583  | 1.656530  | 0.348291  |
| C  | 3.006647  | 0.630293  | -0.144966 |
| C  | 2.085711  | 1.771568  | 0.048043  |

|   |           |           |           |   |           |           |           |
|---|-----------|-----------|-----------|---|-----------|-----------|-----------|
| C | 2.520997  | 3.069277  | 0.257686  | P | -2.022165 | 0.296616  | 0.029330  |
| H | 3.574668  | 3.317217  | 0.296655  | O | -0.710945 | -3.538194 | -0.426807 |
| C | 1.535214  | 4.080274  | 0.386773  | O | 0.269398  | -0.313575 | -3.447103 |
| H | 1.844751  | 5.110422  | 0.550413  | N | 2.335333  | -0.651073 | -0.600702 |
| C | 0.203025  | 3.772232  | 0.304743  | N | 0.705872  | 1.424924  | -0.296339 |
| H | -0.556136 | 4.543349  | 0.403503  | C | 3.082961  | -1.754668 | -0.745017 |
| C | -0.230193 | 2.414553  | 0.091770  | H | 2.535411  | -2.686966 | -0.832112 |
| C | -1.565200 | 2.031058  | 0.009193  | C | 4.472027  | -1.719481 | -0.761072 |
| H | -2.336375 | 2.777664  | 0.176129  | H | 5.036768  | -2.639796 | -0.872080 |
| C | -2.531642 | -0.128190 | 1.857038  | C | 5.102152  | -0.481914 | -0.617096 |
| C | -3.976312 | 0.318159  | 2.139477  | H | 6.186737  | -0.408662 | -0.616293 |
| H | -4.124015 | 1.383864  | 1.926190  | C | 4.326449  | 0.662972  | -0.472375 |
| H | -4.180778 | 0.169624  | 3.209192  | H | 4.799592  | 1.631635  | -0.357410 |
| H | -4.724391 | -0.257441 | 1.586406  | C | 2.928679  | 0.562985  | -0.468614 |
| C | -1.612414 | 0.654779  | 2.815784  | C | 2.026688  | 1.727386  | -0.320642 |
| H | -0.564574 | 0.399892  | 2.648589  | C | 2.483598  | 3.030504  | -0.210813 |
| H | -1.873286 | 0.380422  | 3.848193  | H | 3.539327  | 3.270859  | -0.242612 |
| H | -1.745230 | 1.735725  | 2.702244  | C | 1.511802  | 4.059431  | -0.093549 |
| C | -2.371215 | -1.635739 | 2.122308  | H | 1.837497  | 5.093968  | -0.009455 |
| H | -2.958051 | -2.252240 | 1.433429  | C | 0.176538  | 3.760432  | -0.085700 |
| H | -2.718057 | -1.861304 | 3.141179  | H | -0.570419 | 4.543907  | 0.007928  |
| H | -1.317163 | -1.914782 | 2.049146  | C | -0.278911 | 2.394701  | -0.180895 |
| C | -3.358541 | -0.046042 | -1.166405 | C | -1.617117 | 2.025432  | -0.152051 |
| C | -4.447561 | 1.040596  | -1.061191 | H | -2.369580 | 2.795055  | -0.004995 |
| H | -4.945702 | 1.061897  | -0.090882 | C | -2.646256 | 0.008294  | 1.830813  |
| H | -5.215513 | 0.847471  | -1.823228 | C | -4.111605 | 0.421795  | 2.052377  |
| H | -4.027700 | 2.033267  | -1.257881 | H | -4.286326 | 1.470877  | 1.785233  |
| C | -3.961168 | -1.446114 | -0.963061 | H | -4.335652 | 0.319442  | 3.123406  |
| H | -3.193378 | -2.227385 | -1.006443 | H | -4.829474 | -0.202745 | 1.513650  |
| H | -4.682763 | -1.647868 | -1.767206 | C | -1.785396 | 0.889027  | 2.756935  |
| H | -4.493505 | -1.544487 | -0.013350 | H | -0.727061 | 0.648758  | 2.666135  |
| C | -2.785638 | 0.027938  | -2.590965 | H | -2.090344 | 0.698904  | 3.796081  |
| H | -2.231637 | 0.957976  | -2.755496 | H | -1.931242 | 1.953855  | 2.546282  |
| H | -3.614526 | -0.003589 | -3.311496 | C | -2.444992 | -1.471749 | 2.203522  |
| H | -2.130301 | -0.820174 | -2.808324 | H | -2.987043 | -2.152230 | 1.537476  |
| C | -0.267019 | -2.361740 | -0.668819 | H | -2.820778 | -1.641113 | 3.222897  |
| C | 0.218296  | -0.102355 | -2.274998 | H | -1.379438 | -1.714642 | 2.183027  |
| N | 2.372909  | -1.707814 | 2.725268  | C | -3.441322 | -0.092079 | -1.199636 |
| N | 1.629149  | -2.316664 | 2.046707  | C | -4.529485 | 0.999883  | -1.153217 |
| O | 0.688953  | -0.944856 | 1.565593  | H | -5.040771 | 1.065562  | -0.192590 |
|   |           |           |           | H | -5.288029 | 0.775622  | -1.916066 |
|   |           |           |           | H | -4.104555 | 1.982224  | -1.388441 |
|   |           |           |           | C | -4.040277 | -1.483686 | -0.934757 |
|   |           |           |           | H | -3.267630 | -2.261597 | -0.944600 |
|   |           |           |           | H | -4.760783 | -1.724283 | -1.729180 |

60  
ts-3-4-oh2 el energy= -  
1438.15916514  
Ru 0.161841 -0.601308 -0.418374

|   |           |           |           |
|---|-----------|-----------|-----------|
| H | -4.571180 | -1.545849 | 0.018685  |
| C | -2.865231 | -0.084131 | -2.624939 |
| H | -2.276884 | 0.819066  | -2.819633 |
| H | -3.693855 | -0.108948 | -3.345895 |
| H | -2.244128 | -0.963292 | -2.813975 |
| C | -0.367317 | -2.441501 | -0.419794 |
| C | 0.101816  | -0.428255 | -2.314311 |
| N | 2.528133  | -1.717728 | 2.630230  |
| H | 2.586913  | -0.575414 | 2.844081  |
| N | 1.610300  | -2.045007 | 1.976785  |
| O | 0.560396  | -0.706490 | 1.613285  |
| H | 1.265755  | 0.250201  | 2.130437  |
| O | 2.086929  | 0.727388  | 2.753253  |
| H | 2.586165  | 1.370796  | 2.232678  |

70

ts-3-4-thf      el energy= -  
1594.18244069

|    |           |           |           |
|----|-----------|-----------|-----------|
| Ru | 0.475343  | -0.973592 | -0.320607 |
| P  | 2.276975  | 0.511373  | 0.223342  |
| O  | 1.689159  | -1.929702 | -2.965115 |
| O  | 1.348493  | -3.401524 | 1.304313  |
| N  | -1.521655 | -1.866496 | -0.213260 |
| N  | -0.304902 | -0.207855 | 1.475670  |
| C  | -2.079586 | -2.647100 | -1.150102 |
| H  | -1.423695 | -2.959333 | -1.956396 |
| C  | -3.416206 | -3.022509 | -1.108563 |
| H  | -3.828503 | -3.650784 | -1.892078 |
| C  | -4.200582 | -2.552617 | -0.051900 |
| H  | -5.256057 | -2.806188 | 0.009077  |
| C  | -3.621234 | -1.744791 | 0.917965  |
| H  | -4.218351 | -1.340730 | 1.726253  |
| C  | -2.263406 | -1.413295 | 0.827505  |
| C  | -1.569140 | -0.560273 | 1.814526  |
| C  | -2.147422 | -0.150469 | 3.003378  |
| H  | -3.156286 | -0.437307 | 3.271538  |
| C  | -1.371992 | 0.662948  | 3.865465  |
| H  | -1.802067 | 1.009950  | 4.802856  |
| C  | -0.090434 | 1.015902  | 3.530607  |
| H  | 0.508071  | 1.639975  | 4.188705  |
| C  | 0.499804  | 0.566785  | 2.295988  |
| C  | 1.799036  | 0.874919  | 1.901115  |
| H  | 2.390314  | 1.542173  | 2.521849  |
| C  | 2.245314  | 2.156587  | -0.775799 |
| C  | 3.449714  | 3.070403  | -0.494947 |

|   |           |           |           |
|---|-----------|-----------|-----------|
| H | 3.564262  | 3.277209  | 0.576098  |
| H | 3.276637  | 4.033833  | -0.995193 |
| H | 4.394399  | 2.673942  | -0.878664 |
| C | 0.976439  | 2.905672  | -0.325625 |
| H | 0.094891  | 2.282570  | -0.486438 |
| H | 0.875078  | 3.818627  | -0.930621 |
| H | 1.033896  | 3.194845  | 0.729097  |
| C | 2.138276  | 1.852716  | -2.280563 |
| H | 2.116477  | 2.799594  | -2.839443 |
| H | 1.211607  | 1.313258  | -2.489480 |
| H | 2.985223  | 1.270276  | -2.657431 |
| C | 4.066732  | -0.168660 | 0.264678  |
| C | 4.947265  | 0.660632  | 1.221177  |
| H | 5.068168  | 1.698776  | 0.908206  |
| H | 5.948336  | 0.208984  | 1.262741  |
| H | 4.536046  | 0.649855  | 2.236645  |
| C | 4.682463  | -0.214616 | -1.143741 |
| H | 4.049853  | -0.772725 | -1.843761 |
| H | 5.653528  | -0.727376 | -1.095959 |
| H | 4.858273  | 0.779962  | -1.562275 |
| C | 4.028402  | -1.602085 | 0.818552  |
| H | 3.483905  | -1.653992 | 1.767116  |
| H | 5.057142  | -1.942620 | 1.000386  |
| H | 3.573736  | -2.298483 | 0.108386  |
| C | 1.211171  | -1.575496 | -1.980458 |
| C | 1.134927  | -2.458528 | 0.680789  |
| N | -2.393814 | 0.393771  | -2.570741 |
| H | -2.033616 | 0.608434  | -1.390695 |
| N | -1.278987 | 0.183663  | -2.878190 |
| O | -0.614371 | 0.486683  | -1.302462 |
| C | -4.568757 | 1.744885  | -0.509067 |
| O | -3.468203 | 1.307271  | 0.285552  |
| C | -2.756815 | 2.480195  | 0.678834  |
| C | -2.759201 | 3.376183  | -0.567518 |
| C | -4.088365 | 3.001471  | -1.274842 |
| H | -4.846567 | 0.912093  | -1.162036 |
| H | -5.423921 | 1.985026  | 0.145412  |
| H | -3.273803 | 2.965481  | 1.524934  |
| H | -1.762502 | 2.167090  | 1.004162  |
| H | -2.692756 | 4.440286  | -0.316039 |
| H | -1.903884 | 3.123931  | -1.201123 |
| H | -4.829556 | 3.806123  | -1.213856 |
| H | -3.921549 | 2.778160  | -2.332752 |

57

ts-1b-2b      el energy= -1361.70882074

|    |           |           |           |
|----|-----------|-----------|-----------|
| Ru | 0.211037  | -0.677237 | -0.387224 |
| H  | 0.449388  | -1.055942 | 1.386021  |
| P  | -1.927019 | 0.306924  | 0.025700  |
| O  | -0.766361 | -3.573891 | -0.325528 |
| O  | 0.293567  | -0.440964 | -3.442735 |
| N  | 2.372757  | -0.791586 | -0.376347 |
| N  | 0.803537  | 1.341634  | -0.303528 |
| C  | 3.091092  | -1.925335 | -0.341485 |
| H  | 2.519663  | -2.846709 | -0.379825 |
| C  | 4.476561  | -1.929251 | -0.248207 |
| H  | 5.014762  | -2.871534 | -0.217475 |
| C  | 5.138612  | -0.700475 | -0.186546 |
| H  | 6.221798  | -0.657963 | -0.105295 |
| C  | 4.395446  | 0.472668  | -0.220022 |
| H  | 4.888503  | 1.435370  | -0.150842 |
| C  | 2.999515  | 0.413676  | -0.312838 |
| C  | 2.132702  | 1.606877  | -0.329842 |
| C  | 2.618810  | 2.901908  | -0.372692 |
| H  | 3.681456  | 3.109506  | -0.398882 |
| C  | 1.676370  | 3.959531  | -0.390344 |
| H  | 2.027665  | 4.988771  | -0.419443 |
| C  | 0.331959  | 3.695533  | -0.371691 |
| H  | -0.396882 | 4.501319  | -0.385427 |
| C  | -0.153120 | 2.340933  | -0.330539 |
| C  | -1.504335 | 2.001880  | -0.314446 |
| H  | -2.246344 | 2.792777  | -0.259179 |
| C  | -2.433694 | 0.197851  | 1.880928  |
| C  | -3.814267 | 0.823244  | 2.146865  |
| H  | -3.884654 | 1.840398  | 1.743224  |
| H  | -3.966240 | 0.891704  | 3.233237  |
| H  | -4.637358 | 0.226290  | 1.742058  |
| C  | -1.394129 | 1.029754  | 2.658663  |
| H  | -0.362250 | 0.770930  | 2.411414  |
| H  | -1.537208 | 0.859531  | 3.734628  |
| H  | -1.519243 | 2.098726  | 2.458734  |
| C  | -2.414882 | -1.255967 | 2.383903  |
| H  | -3.101510 | -1.903377 | 1.830401  |
| H  | -2.724670 | -1.273598 | 3.438418  |
| H  | -1.413826 | -1.690149 | 2.332810  |
| C  | -3.413622 | -0.153583 | -1.085607 |
| C  | -4.449063 | 0.987642  | -1.127888 |
| H  | -4.905866 | 1.190816  | -0.157538 |
| H  | -5.255056 | 0.709836  | -1.821367 |
| H  | -3.995992 | 1.913314  | -1.499067 |

|   |           |           |           |
|---|-----------|-----------|-----------|
| C | -4.073146 | -1.466646 | -0.633468 |
| H | -3.343644 | -2.280906 | -0.550398 |
| H | -4.821657 | -1.769190 | -1.379187 |
| H | -4.589503 | -1.369356 | 0.325799  |
| C | -2.885103 | -0.344627 | -2.516911 |
| H | -2.302757 | 0.521343  | -2.849057 |
| H | -3.736449 | -0.462402 | -3.201332 |
| H | -2.266503 | -1.242917 | -2.601929 |
| C | -0.379484 | -2.489370 | -0.356928 |
| C | 0.172963  | -0.507422 | -2.302902 |
| N | 1.043661  | -1.574700 | 2.419940  |
| N | 1.781192  | -0.738388 | 2.858067  |
| O | 2.110404  | 0.409395  | 2.572877  |

57

Complex-2b      el energy= -  
1361.75085656

|    |           |           |           |
|----|-----------|-----------|-----------|
| Ru | 0.301039  | -0.562976 | -0.341592 |
| H  | 1.076263  | -2.750884 | 1.065068  |
| P  | -1.905357 | 0.327401  | 0.034302  |
| O  | -0.740408 | -3.406816 | -0.802073 |
| O  | 0.466034  | -0.031903 | -3.328244 |
| N  | 2.480820  | -0.601086 | -0.382138 |
| N  | 0.813641  | 1.457705  | -0.097765 |
| C  | 3.250909  | -1.690921 | -0.515337 |
| H  | 2.733285  | -2.609213 | -0.771268 |
| C  | 4.627590  | -1.661675 | -0.329405 |
| H  | 5.208280  | -2.572131 | -0.438253 |
| C  | 5.219646  | -0.446416 | 0.018050  |
| H  | 6.291014  | -0.381194 | 0.190044  |
| C  | 4.423195  | 0.685957  | 0.145707  |
| H  | 4.863811  | 1.636759  | 0.422789  |
| C  | 3.042011  | 0.595866  | -0.065865 |
| C  | 2.130462  | 1.755834  | 0.018138  |
| C  | 2.572822  | 3.060391  | 0.154125  |
| H  | 3.626665  | 3.299658  | 0.226117  |
| C  | 1.597014  | 4.088386  | 0.163732  |
| H  | 1.913476  | 5.124105  | 0.267422  |
| C  | 0.265378  | 3.789919  | 0.042523  |
| H  | -0.486966 | 4.573734  | 0.052665  |
| C  | -0.175492 | 2.425450  | -0.087901 |
| C  | -1.512383 | 2.048570  | -0.193213 |
| H  | -2.280040 | 2.812551  | -0.111326 |
| C  | -2.524403 | 0.080540  | 1.840824  |
| C  | -3.978823 | 0.537551  | 2.050244  |

|   |           |           |           |
|---|-----------|-----------|-----------|
| H | -4.126709 | 1.578752  | 1.739705  |
| H | -4.203909 | 0.484776  | 3.124641  |
| H | -4.712354 | -0.089949 | 1.536115  |
| C | -1.635940 | 0.966508  | 2.738450  |
| H | -0.576262 | 0.735773  | 2.617968  |
| H | -1.911044 | 0.779494  | 3.786386  |
| H | -1.798365 | 2.028489  | 2.526070  |
| C | -2.368833 | -1.394848 | 2.248388  |
| H | -2.958126 | -2.070162 | 1.619110  |
| H | -2.714816 | -1.523568 | 3.283499  |
| H | -1.321805 | -1.701389 | 2.207465  |
| C | -3.305457 | -0.119941 | -1.191989 |
| C | -4.382364 | 0.984017  | -1.213117 |
| H | -4.897911 | 1.103614  | -0.259049 |
| H | -5.138406 | 0.725084  | -1.967343 |
| H | -3.947697 | 1.948698  | -1.496968 |
| C | -3.932706 | -1.486389 | -0.866973 |
| H | -3.179879 | -2.281258 | -0.829460 |
| H | -4.648143 | -1.748600 | -1.658967 |
| H | -4.479231 | -1.488926 | 0.079565  |
| C | -2.706779 | -0.191113 | -2.606134 |
| H | -2.150365 | 0.718592  | -2.854192 |
| H | -3.522681 | -0.295807 | -3.334288 |
| H | -2.050041 | -1.057743 | -2.726196 |
| C | -0.297698 | -2.366628 | -0.574389 |
| C | 0.287533  | -0.238193 | -2.212789 |
| N | 1.506658  | -2.682280 | 2.013293  |
| N | 1.372555  | -1.526590 | 2.451161  |
| O | 0.766468  | -0.585125 | 1.748810  |

57

Complex-1 + N2O-b      el energy= -  
1361.74648110

|    |           |           |           |
|----|-----------|-----------|-----------|
| Ru | 0.114708  | -0.747780 | -0.320909 |
| H  | 0.337398  | -0.576810 | 1.296983  |
| P  | -1.993094 | 0.276571  | 0.069115  |
| O  | -0.764608 | -3.578740 | 0.379813  |
| O  | 0.121190  | -1.028795 | -3.436617 |
| N  | 2.278773  | -0.852058 | -0.402324 |
| N  | 0.703320  | 1.271707  | -0.540766 |
| C  | 3.009755  | -1.972018 | -0.284618 |
| H  | 2.444537  | -2.892451 | -0.182707 |
| C  | 4.398883  | -1.964947 | -0.275772 |
| H  | 4.944618  | -2.897556 | -0.170938 |
| C  | 5.054734  | -0.736824 | -0.388242 |

|   |           |           |           |
|---|-----------|-----------|-----------|
| H | 6.140506  | -0.683735 | -0.375043 |
| C | 4.300444  | 0.423604  | -0.514164 |
| H | 4.788835  | 1.388172  | -0.593073 |
| C | 2.900315  | 0.352147  | -0.526856 |
| C | 2.025666  | 1.535910  | -0.648360 |
| C | 2.507083  | 2.819151  | -0.859744 |
| H | 3.566393  | 3.022947  | -0.957478 |
| C | 1.558006  | 3.865242  | -0.957916 |
| H | 1.900338  | 4.884625  | -1.124455 |
| C | 0.217056  | 3.604905  | -0.840928 |
| H | -0.515105 | 4.405110  | -0.909182 |
| C | -0.258749 | 2.264216  | -0.617420 |
| C | -1.602311 | 1.929375  | -0.472384 |
| H | -2.344867 | 2.722151  | -0.461541 |
| C | -2.448944 | 0.382809  | 1.941545  |
| C | -3.832923 | 1.008254  | 2.186059  |
| H | -3.933780 | 1.978167  | 1.684219  |
| H | -3.959128 | 1.183595  | 3.263914  |
| H | -4.655328 | 0.361412  | 1.866122  |
| C | -1.404599 | 1.309547  | 2.593682  |
| H | -0.381645 | 0.975930  | 2.401045  |
| H | -1.566238 | 1.316676  | 3.681079  |
| H | -1.497607 | 2.335328  | 2.222935  |
| C | -2.372401 | -1.002407 | 2.605160  |
| H | -3.075069 | -1.720415 | 2.170995  |
| H | -2.614962 | -0.907850 | 3.673434  |
| H | -1.364361 | -1.419327 | 2.524271  |
| C | -3.523589 | -0.299720 | -0.926027 |
| C | -4.572126 | 0.822703  | -1.053756 |
| H | -4.996350 | 1.129214  | -0.095960 |
| H | -5.400137 | 0.467127  | -1.683185 |
| H | -4.141038 | 1.704875  | -1.539724 |
| C | -4.148758 | -1.562137 | -0.310176 |
| H | -3.402913 | -2.352926 | -0.165429 |
| H | -4.919122 | -1.954108 | -0.989336 |
| H | -4.631394 | -1.366437 | 0.651922  |
| C | -3.047220 | -0.640920 | -2.347822 |
| H | -2.469915 | 0.180771  | -2.785513 |
| H | -3.922675 | -0.820055 | -2.987390 |
| H | -2.435407 | -1.547121 | -2.359651 |
| C | -0.422561 | -2.514512 | 0.086954  |
| C | 0.028400  | -0.915347 | -2.298478 |
| N | 2.876651  | -1.091105 | 2.850644  |
| N | 2.605573  | -0.001050 | 2.714655  |
| O | 2.331734  | 1.143761  | 2.572684  |

57  
 ts-2b-3b el energy= -1361.74443665  
 Ru 0.291330 -0.556289 -0.344061  
 H 1.159616 -2.999820 1.735060  
 P -1.936096 0.293456 0.034588  
 O -0.570993 -3.476223 -0.682725  
 O 0.459876 0.041858 -3.306122  
 N 2.462954 -0.551147 -0.411168  
 N 0.772207 1.465771 -0.044837  
 C 3.241983 -1.628742 -0.581356  
 H 2.727551 -2.552673 -0.822359  
 C 4.623106 -1.580915 -0.441621  
 H 5.213074 -2.481148 -0.580912  
 C 5.208382 -0.362695 -0.094129  
 H 6.283584 -0.284633 0.045431  
 C 4.400468 0.755377 0.079476  
 H 4.835533 1.706988 0.362557  
 C 3.015664 0.648310 -0.091832  
 C 2.086399 1.788153 0.044845  
 C 2.507319 3.097159 0.201773  
 H 3.557981 3.353787 0.259042  
 C 1.513239 4.106259 0.254933  
 H 1.812416 5.144688 0.380648  
 C 0.185910 3.786449 0.142980  
 H -0.580054 4.556253 0.178235  
 C -0.232391 2.418004 -0.019202  
 C -1.562673 2.025094 -0.143524  
 H -2.341321 2.775947 -0.044354  
 C -2.575366 0.012244 1.828615  
 C -4.019525 0.504136 2.027778  
 H -4.141532 1.550216 1.721781  
 H -4.256127 0.449506 3.099648  
 H -4.761224 -0.104954 1.502519  
 C -1.670035 0.856307 2.750165  
 H -0.616213 0.598670 2.625521  
 H -1.954050 0.650954 3.792320  
 H -1.805689 1.926664 2.562658  
 C -2.461682 -1.473936 2.212300  
 H -3.060826 -2.123982 1.566251  
 H -2.827765 -1.607061 3.240425  
 H -1.417479 -1.794761 2.179405  
 C -3.316768 -0.141903 -1.217631  
 C -4.401717 0.953868 -1.238443  
 H -4.932146 1.055281 -0.290449

H -5.144439 0.701338 -2.007989  
 H -3.969497 1.925783 -1.500610  
 C -3.935918 -1.517132 -0.917908  
 H -3.173347 -2.303010 -0.865822  
 H -4.628851 -1.783515 -1.728286  
 H -4.503967 -1.530856 0.015900  
 C -2.699162 -0.189284 -2.624223  
 H -2.152614 0.730689 -2.855365  
 H -3.503824 -0.297474 -3.364347  
 H -2.028006 -1.044945 -2.744513  
 C -0.224121 -2.386737 -0.555284  
 C 0.285683 -0.190694 -2.194017  
 N 1.986111 -2.529486 2.169156  
 N 1.771374 -1.306830 2.212190  
 O 0.569971 -0.886527 1.756088

57  
 ts-3b-4b el energy= -1361.70194217  
 Ru 0.229133 -0.636967 -0.383398  
 H 1.301849 -1.887998 2.507985  
 P -1.934035 0.293135 0.058320  
 O -0.717141 -3.541438 -0.518701  
 O 0.328994 -0.155518 -3.398223  
 N 2.419383 -0.706257 -0.490011  
 N 0.800652 1.382121 -0.183951  
 C 3.156952 -1.822403 -0.556406  
 H 2.606502 -2.742303 -0.727749  
 C 4.538665 -1.816164 -0.406050  
 H 5.096421 -2.745891 -0.463027  
 C 5.170301 -0.592449 -0.171396  
 H 6.247711 -0.542391 -0.035352  
 C 4.404359 0.564888 -0.101743  
 H 4.872562 1.520615 0.104381  
 C 3.014793 0.492396 -0.266825  
 C 2.124700 1.669452 -0.189334  
 C 2.592614 2.971463 -0.143065  
 H 3.651901 3.196530 -0.165303  
 C 1.632524 4.013040 -0.092162  
 H 1.967415 5.047470 -0.051715  
 C 0.292554 3.728275 -0.097358  
 H -0.448050 4.522557 -0.060585  
 C -0.173218 2.366214 -0.153052  
 C -1.518798 2.009967 -0.174948  
 H -2.269239 2.788176 -0.069447  
 C -2.508195 0.064608 1.880319

|   |           |           |           |
|---|-----------|-----------|-----------|
| C | -3.927525 | 0.597328  | 2.140022  |
| H | -4.035361 | 1.642519  | 1.825572  |
| H | -4.117487 | 0.562472  | 3.222111  |
| H | -4.708648 | 0.002905  | 1.656485  |
| C | -1.534799 | 0.889845  | 2.745693  |
| H | -0.504231 | 0.573943  | 2.576676  |
| H | -1.783119 | 0.722961  | 3.803969  |
| H | -1.625127 | 1.960615  | 2.535468  |
| C | -2.410168 | -1.417067 | 2.284256  |
| H | -3.042583 | -2.067814 | 1.671741  |
| H | -2.737532 | -1.528536 | 3.328175  |
| H | -1.372772 | -1.753738 | 2.214531  |
| C | -3.382343 | -0.116926 | -1.124928 |
| C | -4.435381 | 1.009492  | -1.114822 |
| H | -4.915810 | 1.143851  | -0.144479 |
| H | -5.221894 | 0.765990  | -1.842779 |
| H | -3.988349 | 1.963286  | -1.415777 |
| C | -4.027247 | -1.469048 | -0.777609 |
| H | -3.285200 | -2.275488 | -0.746236 |
| H | -4.762043 | -1.727301 | -1.553151 |
| H | -4.554729 | -1.453087 | 0.179972  |
| C | -2.828996 | -0.202724 | -2.556505 |
| H | -2.254791 | 0.691236  | -2.820638 |
| H | -3.669068 | -0.284864 | -3.259963 |
| H | -2.197768 | -1.085308 | -2.695112 |
| C | -0.347094 | -2.451748 | -0.481701 |
| C | 0.178777  | -0.338341 | -2.272774 |
| N | 2.223676  | -1.346340 | 3.096348  |
| N | 2.044163  | -0.336466 | 2.527252  |
| O | 0.661663  | -0.957153 | 1.611148  |

57

Complex-3b el energy= -

1361.75511747

|    |           |           |           |
|----|-----------|-----------|-----------|
| Ru | 0.261041  | -0.696900 | -0.257899 |
| H  | 1.136880  | -0.791280 | 3.920382  |
| P  | -1.917996 | 0.302484  | -0.029274 |
| O  | -0.709837 | -3.594869 | -0.032695 |
| O  | 0.446507  | -0.640813 | -3.286131 |
| N  | 2.428878  | -0.816642 | -0.332986 |
| N  | 0.843139  | 1.316231  | -0.341447 |
| C  | 3.148098  | -1.944459 | -0.260549 |
| H  | 2.581452  | -2.869583 | -0.293039 |
| C  | 4.532381  | -1.940118 | -0.138851 |
| H  | 5.075427  | -2.878152 | -0.078042 |

|   |           |           |           |
|---|-----------|-----------|-----------|
| C | 5.185315  | -0.706594 | -0.088457 |
| H | 6.266254  | -0.656341 | 0.015544  |
| C | 4.437821  | 0.462552  | -0.163530 |
| H | 4.925233  | 1.428840  | -0.104350 |
| C | 3.045010  | 0.392423  | -0.282561 |
| C | 2.173230  | 1.582301  | -0.360889 |
| C | 2.656234  | 2.873082  | -0.476177 |
| H | 3.718489  | 3.082642  | -0.502163 |
| C | 1.710034  | 3.923616  | -0.578178 |
| H | 2.059123  | 4.950624  | -0.662307 |
| C | 0.366370  | 3.656884  | -0.577353 |
| H | -0.363213 | 4.457784  | -0.659922 |
| C | -0.117255 | 2.305004  | -0.466829 |
| C | -1.468306 | 1.964527  | -0.479909 |
| H | -2.208689 | 2.758960  | -0.503685 |
| C | -2.567012 | 0.330140  | 1.782854  |
| C | -3.997906 | 0.881097  | 1.907541  |
| H | -4.097386 | 1.869141  | 1.442335  |
| H | -4.229802 | 1.000392  | 2.975341  |
| H | -4.756929 | 0.215715  | 1.485797  |
| C | -1.642153 | 1.288431  | 2.559345  |
| H | -0.593752 | 1.014781  | 2.454250  |
| H | -1.903950 | 1.240300  | 3.625895  |
| H | -1.768671 | 2.321714  | 2.220427  |
| C | -2.485177 | -1.079354 | 2.396884  |
| H | -3.079614 | -1.814505 | 1.844722  |
| H | -2.877911 | -1.046586 | 3.423641  |
| H | -1.447133 | -1.417829 | 2.442694  |
| C | -3.324137 | -0.264030 | -1.199800 |
| C | -4.369518 | 0.854962  | -1.382292 |
| H | -4.894007 | 1.111789  | -0.460878 |
| H | -5.122856 | 0.520821  | -2.109262 |
| H | -3.903106 | 1.762502  | -1.781301 |
| C | -3.988613 | -1.556942 | -0.698171 |
| H | -3.252940 | -2.353083 | -0.534049 |
| H | -4.697644 | -1.915249 | -1.457672 |
| H | -4.548628 | -1.413887 | 0.229711  |
| C | -2.719182 | -0.542824 | -2.585066 |
| H | -2.128897 | 0.305848  | -2.945705 |
| H | -3.533126 | -0.716182 | -3.302323 |
| H | -2.092221 | -1.439281 | -2.580757 |
| C | -0.329685 | -2.513338 | -0.120904 |
| C | 0.255618  | -0.674567 | -2.153436 |
| N | 1.864053  | -0.171946 | 3.499425  |
| N | 1.647346  | -0.083700 | 2.278130  |

O 0.579685 -0.772805 1.838515

57

Complex-4b + N2 el energy= -  
1361.83525028

Ru 0.159852 -0.671617 -0.298245  
H 0.798570 -1.435941 2.072139  
P -2.011530 0.274748 0.095374  
O -0.742914 -3.577375 -0.016121  
O 0.154938 -0.643476 -3.348514  
N 2.335907 -0.728300 -0.492282  
N 0.691010 1.360659 -0.367931  
C 3.093584 -1.832043 -0.535465  
H 2.553751 -2.772785 -0.585496  
C 4.483045 -1.789550 -0.515519  
H 5.056114 -2.711034 -0.550835  
C 5.101438 -0.539863 -0.440703  
H 6.185127 -0.457827 -0.413645  
C 4.314772 0.604780 -0.391924  
H 4.777257 1.582187 -0.318167  
C 2.917352 0.495635 -0.422748  
C 2.010409 1.662463 -0.401853  
C 2.460915 2.971104 -0.460657  
H 3.516491 3.210040 -0.501065  
C 1.487284 4.000228 -0.494003  
H 1.808581 5.038758 -0.540412  
C 0.151098 3.698501 -0.471148  
H -0.600035 4.483336 -0.496002  
C -0.295595 2.330920 -0.400371  
C -1.635746 1.955921 -0.357998  
H -2.395153 2.731261 -0.310327  
C -2.532611 0.268218 1.949243  
C -3.957304 0.799486 2.180053  
H -4.095390 1.796492 1.744484  
H -4.119275 0.893452 3.263208  
H -4.737394 0.136506 1.793620  
C -1.555356 1.211932 2.680257  
H -0.523005 0.878386 2.541298  
H -1.794114 1.189325 3.754148  
H -1.661910 2.243505 2.328138  
C -2.389099 -1.148944 2.530255  
H -3.013454 -1.888187 2.017982  
H -2.688186 -1.139809 3.588330  
H -1.343406 -1.459266 2.473603  
C -3.486028 -0.298659 -0.983445

C -4.560330 0.803593 -1.078785  
H -5.018605 1.046244 -0.118898  
H -5.360310 0.461858 -1.750505  
H -4.139203 1.721176 -1.504212  
C -4.093165 -1.608701 -0.454666  
H -3.334292 -2.393233 -0.351241  
H -4.846741 -1.971049 -1.168156  
H -4.590211 -1.485365 0.511301  
C -2.973276 -0.549145 -2.410911  
H -2.418243 0.312457 -2.796201  
H -3.832198 -0.722186 -3.074051  
H -2.335027 -1.435707 -2.462825  
C -0.384234 -2.487807 -0.134007  
C 0.042400 -0.650678 -2.203131  
O 0.682881 -0.549919 1.706891  
N 3.335850 -1.069635 2.756125  
N 3.827686 -0.082847 2.777382

60

ts-3-4-oh2-b el energy= -  
1438.15397275

Ru 0.174770 -0.426276 -0.555545  
H 2.554691 -2.246577 2.241835  
P -2.021639 0.267037 0.124460  
O -0.676026 -3.237949 -1.414721  
O 0.169899 0.746175 -3.362001  
N 2.353052 -0.357475 -0.731788  
N 0.658551 1.521650 0.081328  
C 3.138914 -1.386279 -1.080126  
H 2.622875 -2.269312 -1.445192  
C 4.524124 -1.335300 -0.990003  
H 5.121417 -2.194719 -1.278938  
C 5.109910 -0.157189 -0.517391  
H 6.189489 -0.076641 -0.419630  
C 4.296557 0.912417 -0.166370  
H 4.730988 1.826826 0.220891  
C 2.903971 0.798716 -0.279571  
C 1.965901 1.877304 0.091984  
C 2.375166 3.159041 0.414266  
H 3.420786 3.441628 0.409080  
C 1.371197 4.107732 0.735252  
H 1.659623 5.122907 0.999456  
C 0.047585 3.757459 0.710300  
H -0.726615 4.480905 0.950914  
C -0.357695 2.419411 0.359797



|   |           |           |           |
|---|-----------|-----------|-----------|
| C | -1.685326 | 2.009214  | 0.290247  |
| H | -2.465516 | 2.704140  | 0.587094  |
| C | -2.544765 | -0.407087 | 1.847695  |
| C | -3.983806 | -0.023174 | 2.232172  |
| H | -4.149615 | 1.059178  | 2.168943  |
| H | -4.149536 | -0.316438 | 3.278350  |
| H | -4.743769 | -0.531356 | 1.631178  |
| C | -1.600359 | 0.250347  | 2.873385  |
| H | -0.556366 | 0.056767  | 2.628164  |
| H | -1.809200 | -0.181568 | 3.862747  |
| H | -1.763878 | 1.331760  | 2.928498  |
| C | -2.365213 | -1.934901 | 1.895453  |
| H | -2.967819 | -2.456665 | 1.144791  |
| H | -2.680405 | -2.302642 | 2.882577  |
| H | -1.311688 | -2.190821 | 1.757599  |
| C | -3.474373 | 0.073763  | -1.108544 |
| C | -4.577388 | 1.113486  | -0.823857 |
| H | -5.046478 | 0.990247  | 0.153364  |
| H | -5.364513 | 1.011047  | -1.583888 |
| H | -4.180340 | 2.132264  | -0.892738 |
| C | -4.049947 | -1.352140 | -1.081805 |
| H | -3.272553 | -2.106688 | -1.248959 |
| H | -4.789326 | -1.456438 | -1.888335 |
| H | -4.556197 | -1.587324 | -0.141855 |
| C | -2.949966 | 0.353175  | -2.526026 |
| H | -2.424962 | 1.312431  | -2.579628 |
| H | -3.800736 | 0.395198  | -3.219964 |
| H | -2.282334 | -0.439819 | -2.875371 |
| C | -0.338165 | -2.186600 | -1.091556 |
| C | 0.055714  | 0.298202  | -2.308910 |
| N | 2.683012  | -1.169038 | 2.598314  |
| N | 1.857149  | -0.422944 | 2.218670  |
| O | 0.625149  | -1.232182 | 1.324612  |
| O | 1.863529  | -3.266352 | 1.490955  |
| H | 2.343115  | -3.526660 | 0.693684  |
| H | 1.138566  | -2.399496 | 1.277607  |

70

ts-3-4-thf-b el energy= -  
1594.17835734

|    |           |           |           |
|----|-----------|-----------|-----------|
| Ru | -0.194024 | 0.182889  | -0.645552 |
| P  | -2.292496 | -0.610484 | 0.193471  |
| O  | 0.511700  | -2.414814 | -2.097307 |
| O  | -1.202943 | 1.622161  | -3.142285 |
| N  | 1.556407  | 1.486357  | -0.803284 |

|   |           |           |           |
|---|-----------|-----------|-----------|
| N | -0.779775 | 1.920137  | 0.393366  |
| C | 2.735739  | 1.132231  | -1.331771 |
| H | 2.774994  | 0.153628  | -1.795283 |
| C | 3.862667  | 1.942848  | -1.239717 |
| H | 4.800439  | 1.615446  | -1.678139 |
| C | 3.751366  | 3.160207  | -0.565214 |
| H | 4.610702  | 3.818326  | -0.462574 |
| C | 2.529630  | 3.517663  | -0.006608 |
| H | 2.430407  | 4.443151  | 0.549089  |
| C | 1.429083  | 2.660581  | -0.134013 |
| C | 0.104964  | 2.944524  | 0.459475  |
| C | -0.223061 | 4.159455  | 1.036516  |
| H | 0.482798  | 4.980173  | 1.074629  |
| C | -1.531154 | 4.305291  | 1.562374  |
| H | -1.818371 | 5.245798  | 2.028112  |
| C | -2.433705 | 3.277618  | 1.484866  |
| H | -3.439196 | 3.385229  | 1.882606  |
| C | -2.076733 | 2.026013  | 0.867405  |
| C | -2.954495 | 0.953951  | 0.730954  |
| H | -3.941147 | 1.023472  | 1.180023  |
| C | -2.120174 | -1.745717 | 1.737471  |
| C | -3.460200 | -2.324130 | 2.222111  |
| H | -4.203679 | -1.537628 | 2.400176  |
| H | -3.290573 | -2.833751 | 3.181271  |
| H | -3.887584 | -3.062097 | 1.536530  |
| C | -1.563912 | -0.855225 | 2.866143  |
| H | -0.626670 | -0.383886 | 2.569325  |
| H | -1.370052 | -1.487565 | 3.744897  |
| H | -2.281862 | -0.079348 | 3.151661  |
| C | -1.115935 | -2.876091 | 1.448802  |
| H | -1.417088 | -3.508486 | 0.607022  |
| H | -1.036218 | -3.523022 | 2.334871  |
| H | -0.132586 | -2.442256 | 1.246533  |
| C | -3.550761 | -1.381512 | -1.027031 |
| C | -4.993184 | -1.219175 | -0.506973 |
| H | -5.178046 | -1.750777 | 0.427815  |
| H | -5.688636 | -1.619010 | -1.258265 |
| H | -5.236916 | -0.161396 | -0.358779 |
| C | -3.234108 | -2.861185 | -1.301457 |
| H | -2.202070 | -2.997332 | -1.644745 |
| H | -3.897398 | -3.230039 | -2.096620 |
| H | -3.388844 | -3.496802 | -0.425424 |
| C | -3.462772 | -0.616936 | -2.357759 |
| H | -3.563698 | 0.463098  | -2.209109 |
| H | -4.280253 | -0.945890 | -3.014239 |

|   |           |           |           |
|---|-----------|-----------|-----------|
| H | -2.522243 | -0.817532 | -2.878867 |
| C | 0.277259  | -1.429896 | -1.548647 |
| C | -0.912898 | 1.014505  | -2.209522 |
| N | 2.764613  | 0.093466  | 1.944828  |
| H | 2.320720  | -0.658926 | 1.089302  |
| N | 1.704344  | 0.561866  | 2.136222  |
| O | 0.882603  | -0.493757 | 0.986421  |
| C | 3.028529  | -3.080569 | -0.148084 |
| O | 3.514496  | -1.781263 | -0.541531 |
| C | 4.832391  | -1.577683 | -0.020877 |
| C | 4.956947  | -2.530915 | 1.167828  |
| C | 4.148615  | -3.741153 | 0.671994  |
| H | 2.117804  | -2.926583 | 0.444407  |
| H | 2.763166  | -3.647598 | -1.048020 |
| H | 5.580565  | -1.809893 | -0.797935 |
| H | 4.922114  | -0.521089 | 0.253544  |
| H | 5.996710  | -2.773552 | 1.412836  |
| H | 4.486625  | -2.083600 | 2.051371  |
| H | 4.772413  | -4.376549 | 0.030228  |
| H | 3.757643  | -4.363175 | 1.484067  |

57

ts-1b-5b el energy= -1361.67046206

|    |           |           |           |
|----|-----------|-----------|-----------|
| Ru | 0.241409  | -0.516860 | -0.474184 |
| H  | 0.658562  | -1.919139 | 1.256980  |
| P  | -1.952110 | 0.289997  | 0.074725  |
| O  | -0.585645 | -3.443746 | -0.898218 |
| O  | 0.239588  | 0.162403  | -3.402523 |
| N  | 2.419560  | -0.527834 | -0.541233 |
| N  | 0.739692  | 1.472641  | -0.025934 |
| C  | 3.189984  | -1.603615 | -0.761477 |
| H  | 2.667012  | -2.515013 | -1.031893 |
| C  | 4.573088  | -1.568220 | -0.634942 |
| H  | 5.155640  | -2.467450 | -0.808021 |
| C  | 5.170428  | -0.362737 | -0.264424 |
| H  | 6.248330  | -0.293404 | -0.142608 |
| C  | 4.371343  | 0.753708  | -0.043194 |
| H  | 4.817649  | 1.693395  | 0.261079  |
| C  | 2.983245  | 0.656998  | -0.182874 |
| C  | 2.060370  | 1.786629  | 0.042872  |
| C  | 2.485746  | 3.080092  | 0.283804  |
| H  | 3.538314  | 3.330616  | 0.331933  |
| C  | 1.498902  | 4.083389  | 0.451658  |
| H  | 1.806860  | 5.109068  | 0.642667  |
| C  | 0.167206  | 3.772110  | 0.373378  |

|   |           |           |           |
|---|-----------|-----------|-----------|
| H | -0.595293 | 4.535468  | 0.501166  |
| C | -0.259144 | 2.419822  | 0.129701  |
| C | -1.595758 | 2.032230  | 0.052205  |
| H | -2.371655 | 2.768911  | 0.235727  |
| C | -2.442888 | -0.197034 | 1.873878  |
| C | -3.842082 | 0.325885  | 2.241929  |
| H | -3.935794 | 1.401817  | 2.051884  |
| H | -4.000500 | 0.169791  | 3.318001  |
| H | -4.647753 | -0.196348 | 1.716617  |
| C | -1.420581 | 0.486192  | 2.801903  |
| H | -0.387462 | 0.191753  | 2.589052  |
| H | -1.646085 | 0.195021  | 3.837597  |
| H | -1.491018 | 1.576547  | 2.730965  |
| C | -2.378141 | -1.718885 | 2.085194  |
| H | -1.368695 | -2.104539 | 1.913299  |
| H | -3.069441 | -2.271770 | 1.442799  |
| H | -2.640335 | -1.947229 | 3.127284  |
| C | -3.412941 | -0.026261 | -1.115316 |
| C | -4.491014 | 1.064605  | -0.956474 |
| H | -4.944587 | 1.081632  | 0.036200  |
| H | -5.292624 | 0.877404  | -1.684265 |
| H | -4.077175 | 2.056820  | -1.166249 |
| C | -4.019464 | -1.423542 | -0.909710 |
| H | -3.257644 | -2.210319 | -0.964409 |
| H | -4.751358 | -1.617798 | -1.705968 |
| H | -4.543543 | -1.518260 | 0.045340  |
| C | -2.879637 | 0.063806  | -2.554460 |
| H | -2.323482 | 0.992307  | -2.721075 |
| H | -3.727699 | 0.049362  | -3.252524 |
| H | -2.238075 | -0.787136 | -2.801414 |
| C | -0.254429 | -2.353925 | -0.729312 |
| C | 0.150709  | -0.075848 | -2.280374 |
| O | 1.590809  | -0.489594 | 2.189555  |
| N | 1.498810  | -1.774833 | 2.030454  |
| N | 2.083343  | -2.712047 | 2.457963  |

57

Complex-5b el energy= -

1361.71453574

|    |           |           |           |
|----|-----------|-----------|-----------|
| Ru | 0.276730  | -0.555717 | -0.364865 |
| H  | 0.779071  | -2.709783 | 1.832382  |
| P  | -1.935968 | 0.287909  | 0.056902  |
| O  | -0.626062 | -3.459874 | -0.742492 |
| O  | 0.366429  | 0.007136  | -3.352759 |
| N  | 2.453602  | -0.550144 | -0.455707 |

|   |           |           |           |
|---|-----------|-----------|-----------|
| N | 0.752356  | 1.468569  | -0.108181 |
| C | 3.238924  | -1.622877 | -0.619700 |
| H | 2.732098  | -2.544361 | -0.888311 |
| C | 4.616370  | -1.575834 | -0.443755 |
| H | 5.211459  | -2.473622 | -0.577520 |
| C | 5.189777  | -0.361737 | -0.065612 |
| H | 6.260411  | -0.284180 | 0.105486  |
| C | 4.375616  | 0.753564  | 0.096656  |
| H | 4.801319  | 1.702795  | 0.401351  |
| C | 2.996328  | 0.646010  | -0.112375 |
| C | 2.065353  | 1.788054  | -0.000834 |
| C | 2.484818  | 3.098890  | 0.146887  |
| H | 3.535097  | 3.355021  | 0.212774  |
| C | 1.491606  | 4.109146  | 0.174278  |
| H | 1.790724  | 5.149188  | 0.286629  |
| C | 0.164176  | 3.789105  | 0.058270  |
| H | -0.601639 | 4.559531  | 0.080503  |
| C | -0.253061 | 2.418879  | -0.082078 |
| C | -1.584168 | 2.016820  | -0.179618 |
| H | -2.365172 | 2.765016  | -0.078673 |
| C | -2.508477 | 0.044891  | 1.878369  |
| C | -3.948987 | 0.525215  | 2.123773  |
| H | -4.092203 | 1.563498  | 1.800889  |
| H | -4.146049 | 0.490893  | 3.204506  |
| H | -4.703656 | -0.100729 | 1.638168  |
| C | -1.574951 | 0.911941  | 2.748712  |
| H | -0.525449 | 0.644606  | 2.606232  |
| H | -1.831518 | 0.741221  | 3.804331  |
| H | -1.708781 | 1.976789  | 2.532046  |
| C | -2.357071 | -1.429187 | 2.290221  |
| H | -1.304625 | -1.715770 | 2.235520  |
| H | -2.949982 | -2.109735 | 1.670828  |
| H | -2.690833 | -1.552435 | 3.330328  |
| C | -3.356462 | -0.187966 | -1.133215 |
| C | -4.449242 | 0.900167  | -1.141826 |
| H | -4.943577 | 1.023661  | -0.176933 |
| H | -5.219181 | 0.622642  | -1.875190 |
| H | -4.034298 | 1.867313  | -1.445899 |
| C | -3.957140 | -1.558839 | -0.779346 |
| H | -3.189821 | -2.340534 | -0.740485 |
| H | -4.679424 | -1.845556 | -1.556501 |
| H | -4.489931 | -1.554356 | 0.175404  |
| C | -2.787844 | -0.266252 | -2.559459 |
| H | -2.256337 | 0.651278  | -2.831545 |
| H | -3.617453 | -0.397703 | -3.267642 |

|   |           |           |           |
|---|-----------|-----------|-----------|
| H | -2.114172 | -1.119499 | -2.682648 |
| C | -0.251724 | -2.382408 | -0.571665 |
| C | 0.221693  | -0.215101 | -2.234968 |
| O | 0.745071  | -0.732985 | 1.678961  |
| N | 1.450529  | -1.924093 | 2.010292  |
| N | 2.549316  | -2.017384 | 2.436237  |

57

Complex-6b el energy= -1361.72788645

|    |           |           |           |
|----|-----------|-----------|-----------|
| Ru | 0.320352  | -0.523107 | -0.311229 |
| H  | 1.385581  | -1.898201 | 3.144021  |
| P  | -1.898157 | 0.337957  | 0.023092  |
| O  | -0.585676 | -3.407528 | -0.873253 |
| O  | 0.546788  | 0.026454  | -3.281865 |
| N  | 2.492154  | -0.556645 | -0.312949 |
| N  | 0.820116  | 1.490005  | 0.005363  |
| C  | 3.258121  | -1.648238 | -0.454461 |
| H  | 2.728411  | -2.569436 | -0.668229 |
| C  | 4.640041  | -1.610702 | -0.303495 |
| H  | 5.222286  | -2.519034 | -0.423835 |
| C  | 5.237725  | -0.389951 | 0.015814  |
| H  | 6.314069  | -0.318765 | 0.152326  |
| C  | 4.440944  | 0.740337  | 0.162471  |
| H  | 4.886138  | 1.694433  | 0.420947  |
| C  | 3.054373  | 0.642935  | -0.011801 |
| C  | 2.136013  | 1.797004  | 0.102373  |
| C  | 2.572849  | 3.102315  | 0.257756  |
| H  | 3.626101  | 3.347609  | 0.318940  |
| C  | 1.589906  | 4.122661  | 0.301487  |
| H  | 1.900247  | 5.158471  | 0.422935  |
| C  | 0.259059  | 3.817673  | 0.185956  |
| H  | -0.497494 | 4.597197  | 0.213896  |
| C  | -0.174712 | 2.453409  | 0.025360  |
| C  | -1.508251 | 2.073004  | -0.101667 |
| H  | -2.280261 | 2.831969  | -0.011738 |
| C  | -2.588786 | 0.020180  | 1.794146  |
| C  | -4.036454 | 0.504945  | 1.981131  |
| H  | -4.149145 | 1.562219  | 1.712549  |
| H  | -4.300487 | 0.409658  | 3.044034  |
| H  | -4.766051 | -0.080592 | 1.414396  |
| C  | -1.706050 | 0.833775  | 2.762618  |
| H  | -0.653780 | 0.556743  | 2.676999  |
| H  | -2.036812 | 0.625235  | 3.790854  |
| H  | -1.808199 | 1.908714  | 2.581487  |
| C  | -2.482776 | -1.475627 | 2.137253  |

|   |           |           |           |
|---|-----------|-----------|-----------|
| H | -3.095270 | -2.103539 | 1.482808  |
| H | -2.829961 | -1.638178 | 3.167919  |
| H | -1.446803 | -1.812545 | 2.071077  |
| C | -3.264523 | -0.046357 | -1.262414 |
| C | -4.339932 | 1.058450  | -1.273585 |
| H | -4.885476 | 1.142630  | -0.332455 |
| H | -5.072355 | 0.831966  | -2.061051 |
| H | -3.894882 | 2.032561  | -1.504802 |
| C | -3.897094 | -1.425953 | -1.013515 |
| H | -3.138389 | -2.215605 | -0.964559 |
| H | -4.571625 | -1.667628 | -1.846983 |
| H | -4.488872 | -1.461503 | -0.094917 |
| C | -2.621578 | -0.061822 | -2.658529 |
| H | -2.049902 | 0.852192  | -2.849626 |
| H | -3.414722 | -0.127698 | -3.416061 |
| H | -1.967855 | -0.928118 | -2.793359 |
| C | -0.175495 | -2.378332 | -0.563532 |
| C | 0.346611  | -0.183850 | -2.168373 |
| O | 0.688320  | -0.764352 | 1.757681  |
| N | 1.146335  | -2.018327 | 2.139138  |
| N | 1.259532  | -3.025766 | 1.509830  |

57

ts-5b-6b el energy= -1361.71381697

|    |           |           |           |
|----|-----------|-----------|-----------|
| Ru | 0.297889  | -0.550014 | -0.335984 |
| H  | 0.542447  | -2.518699 | 2.596301  |
| P  | -1.935318 | 0.289238  | 0.023011  |
| O  | -0.533264 | -3.483267 | -0.634420 |
| O  | 0.468993  | -0.008706 | -3.319610 |
| N  | 2.468027  | -0.531438 | -0.414450 |
| N  | 0.760217  | 1.475347  | -0.061312 |
| C  | 3.256534  | -1.595297 | -0.609196 |
| H  | 2.751352  | -2.519077 | -0.870565 |
| C  | 4.638548  | -1.535470 | -0.479421 |
| H  | 5.237507  | -2.425086 | -0.646091 |
| C  | 5.210485  | -0.323892 | -0.093793 |
| H  | 6.285133  | -0.237602 | 0.046122  |
| C  | 4.390307  | 0.780028  | 0.113874  |
| H  | 4.815778  | 1.728994  | 0.419962  |
| C  | 3.007814  | 0.663874  | -0.068327 |
| C  | 2.070824  | 1.799579  | 0.061771  |
| C  | 2.482713  | 3.110174  | 0.232280  |
| H  | 3.530987  | 3.369987  | 0.313813  |
| C  | 1.485021  | 4.115804  | 0.260671  |
| H  | 1.778120  | 5.155401  | 0.392009  |

|   |           |           |           |
|---|-----------|-----------|-----------|
| C | 0.160925  | 3.792492  | 0.118401  |
| H | -0.608066 | 4.559891  | 0.136450  |
| C | -0.248362 | 2.422709  | -0.047380 |
| C | -1.576376 | 2.020217  | -0.181544 |
| H | -2.359947 | 2.767286  | -0.091397 |
| C | -2.587316 | 0.040036  | 1.819020  |
| C | -4.033633 | 0.528107  | 2.007505  |
| H | -4.156698 | 1.569125  | 1.685513  |
| H | -4.275868 | 0.488562  | 3.078941  |
| H | -4.771084 | -0.090067 | 1.487020  |
| C | -1.686617 | 0.896720  | 2.733099  |
| H | -0.634853 | 0.619366  | 2.634332  |
| H | -1.992412 | 0.727068  | 3.775955  |
| H | -1.800734 | 1.962931  | 2.512456  |
| C | -2.466387 | -1.436931 | 2.228846  |
| H | -3.059913 | -2.106423 | 1.598483  |
| H | -2.816661 | -1.558841 | 3.263757  |
| H | -1.418312 | -1.740741 | 2.184026  |
| C | -3.313978 | -0.176031 | -1.221811 |
| C | -4.404489 | 0.913386  | -1.266783 |
| H | -4.938718 | 1.030848  | -0.322734 |
| H | -5.143750 | 0.643008  | -2.033684 |
| H | -3.975593 | 1.882054  | -1.545857 |
| C | -3.926613 | -1.548760 | -0.897684 |
| H | -3.159154 | -2.328641 | -0.827539 |
| H | -4.614438 | -1.835753 | -1.705402 |
| H | -4.499563 | -1.547700 | 0.033484  |
| C | -2.694330 | -0.248069 | -2.626633 |
| H | -2.151770 | 0.669742  | -2.874764 |
| H | -3.497816 | -0.374497 | -3.365245 |
| H | -2.018300 | -1.102017 | -2.729057 |
| C | -0.196106 | -2.388234 | -0.519404 |
| C | 0.292192  | -0.221608 | -2.204059 |
| O | 0.660323  | -0.752224 | 1.736755  |
| N | 1.306763  | -1.947321 | 2.171562  |
| N | 2.456372  | -2.228943 | 2.143263  |

57

ts-4-6b el energy= -1361.68606314

|    |           |           |           |
|----|-----------|-----------|-----------|
| Ru | -0.285697 | -0.491769 | 0.385338  |
| H  | -1.690001 | -1.295328 | -2.644332 |
| P  | 1.934438  | 0.290094  | -0.058907 |
| O  | 0.542484  | -3.402654 | 0.852008  |
| O  | -0.461134 | 0.244627  | 3.347442  |
| N  | -2.473548 | -0.451435 | 0.434270  |

|   |           |           |           |
|---|-----------|-----------|-----------|
| N | -0.744818 | 1.520325  | -0.022906 |
| C | -3.275309 | -1.497171 | 0.679574  |
| H | -2.778404 | -2.406876 | 0.999649  |
| C | -4.655137 | -1.436053 | 0.518339  |
| H | -5.264901 | -2.311364 | 0.720045  |
| C | -5.214792 | -0.231849 | 0.085442  |
| H | -6.288120 | -0.141093 | -0.062574 |
| C | -4.383936 | 0.857397  | -0.152535 |
| H | -4.800836 | 1.799805  | -0.489319 |
| C | -3.000062 | 0.734453  | 0.034531  |
| C | -2.049639 | 1.851006  | -0.160033 |
| C | -2.453979 | 3.151716  | -0.416015 |
| H | -3.500301 | 3.417699  | -0.504154 |
| C | -1.445913 | 4.142390  | -0.523576 |
| H | -1.729563 | 5.174584  | -0.718966 |
| C | -0.123676 | 3.812232  | -0.382577 |
| H | 0.653046  | 4.567512  | -0.467141 |
| C | 0.275231  | 2.450600  | -0.131250 |
| C | 1.599289  | 2.040769  | -0.005675 |
| H | 2.389957  | 2.768908  | -0.163610 |
| C | 2.555677  | -0.140145 | -1.829828 |
| C | 4.016725  | 0.265056  | -2.086142 |
| H | 4.189455  | 1.327046  | -1.872981 |
| H | 4.236814  | 0.107861  | -3.151714 |
| H | 4.738967  | -0.328585 | -1.517696 |
| C | 1.671990  | 0.665069  | -2.804192 |
| H | 0.615377  | 0.436783  | -2.641900 |
| H | 1.940527  | 0.378594  | -3.832089 |
| H | 1.835872  | 1.742252  | -2.693675 |
| C | 2.354751  | -1.642883 | -2.095055 |
| H | 2.904642  | -2.276338 | -1.390937 |
| H | 2.716880  | -1.883479 | -3.105585 |
| H | 1.287823  | -1.877065 | -2.040449 |
| C | 3.323150  | -0.070129 | 1.208376  |
| C | 4.437016  | 0.992500  | 1.121772  |
| H | 4.953958  | 1.000346  | 0.161051  |
| H | 5.186066  | 0.785626  | 1.899037  |
| H | 4.034399  | 1.994396  | 1.307558  |
| C | 3.899883  | -1.483211 | 1.020145  |
| H | 3.115088  | -2.247685 | 1.053714  |
| H | 4.604156  | -1.696985 | 1.836622  |
| H | 4.445156  | -1.596361 | 0.079359  |
| C | 2.724249  | 0.020025  | 2.621361  |
| H | 2.186911  | 0.962110  | 2.772037  |
| H | 3.538027  | -0.027370 | 3.358304  |

|   |           |           |           |
|---|-----------|-----------|-----------|
| H | 2.045599  | -0.812371 | 2.827398  |
| C | 0.199767  | -2.318915 | 0.668547  |
| C | -0.281758 | -0.048666 | 2.248383  |
| O | -0.643857 | -0.855148 | -1.594808 |
| N | -1.691872 | -2.248313 | -2.179338 |
| N | -2.025990 | -3.228568 | -1.709688 |

57

ts-1-5 el energy= -1361.67649535

|    |           |           |           |
|----|-----------|-----------|-----------|
| Ru | 0.231762  | -0.500610 | -0.502253 |
| H  | 0.909542  | -0.611355 | 1.628500  |
| P  | -1.933543 | 0.318731  | 0.091177  |
| O  | -0.591296 | -3.416018 | -1.049528 |
| O  | 0.227537  | 0.358895  | -3.380436 |
| N  | 2.428189  | -0.544313 | -0.508492 |
| N  | 0.776905  | 1.467558  | 0.030173  |
| C  | 3.176071  | -1.646286 | -0.679184 |
| H  | 2.631035  | -2.558615 | -0.890243 |
| C  | 4.558394  | -1.629186 | -0.549311 |
| H  | 5.125257  | -2.544460 | -0.687368 |
| C  | 5.179975  | -0.423194 | -0.217380 |
| H  | 6.258688  | -0.372273 | -0.093525 |
| C  | 4.402863  | 0.712902  | -0.024671 |
| H  | 4.863805  | 1.649892  | 0.266423  |
| C  | 3.012702  | 0.636175  | -0.171929 |
| C  | 2.103213  | 1.779724  | 0.052214  |
| C  | 2.543231  | 3.072136  | 0.267593  |
| H  | 3.598313  | 3.316914  | 0.274466  |
| C  | 1.566619  | 4.082375  | 0.461484  |
| H  | 1.886276  | 5.107161  | 0.637338  |
| C  | 0.231761  | 3.779324  | 0.425145  |
| H  | -0.521089 | 4.549641  | 0.567702  |
| C  | -0.213168 | 2.430418  | 0.189828  |
| C  | -1.553062 | 2.059895  | 0.121720  |
| H  | -2.318843 | 2.805544  | 0.312348  |
| C  | -2.404597 | -0.216732 | 1.884836  |
| C  | -3.830926 | 0.210953  | 2.272525  |
| H  | -3.991347 | 1.285498  | 2.123349  |
| H  | -3.977153 | 0.004370  | 3.341943  |
| H  | -4.604522 | -0.339449 | 1.729718  |
| C  | -1.443496 | 0.521487  | 2.837451  |
| H  | -0.390488 | 0.367722  | 2.589754  |
| H  | -1.598358 | 0.144514  | 3.857075  |
| H  | -1.629565 | 1.599898  | 2.831963  |
| C  | -2.244208 | -1.738132 | 2.054311  |

|   |           |           |           |
|---|-----------|-----------|-----------|
| H | -2.899760 | -2.301065 | 1.381835  |
| H | -2.517694 | -2.013473 | 3.082687  |
| H | -1.215171 | -2.071067 | 1.883098  |
| C | -3.411028 | 0.050313  | -1.085787 |
| C | -4.503033 | 1.114516  | -0.858675 |
| H | -4.951859 | 1.068352  | 0.134863  |
| H | -5.306113 | 0.958052  | -1.592002 |
| H | -4.105667 | 2.123671  | -1.014396 |
| C | -3.986111 | -1.368079 | -0.939406 |
| H | -3.209868 | -2.133515 | -1.055069 |
| H | -4.734661 | -1.534970 | -1.726296 |
| H | -4.481309 | -1.526672 | 0.022409  |
| C | -2.899438 | 0.219219  | -2.526435 |
| H | -2.353578 | 1.160013  | -2.654520 |
| H | -3.758060 | 0.230859  | -3.211397 |
| H | -2.253646 | -0.611462 | -2.824754 |
| C | -0.260814 | -2.343432 | -0.812325 |
| C | 0.137032  | 0.010333  | -2.286355 |
| N | 2.239450  | -1.370375 | 2.931041  |
| N | 1.444670  | -1.492879 | 2.062989  |
| O | 1.008143  | -2.544899 | 1.393931  |

57

Complex-5 el energy= -1361.71378481

|    |           |           |           |
|----|-----------|-----------|-----------|
| Ru | 0.239532  | -0.686019 | -0.209309 |
| H  | 1.123297  | 0.945361  | 2.486351  |
| P  | -1.942546 | 0.301337  | 0.010795  |
| O  | -0.718172 | -3.592059 | -0.090207 |
| O  | 0.569351  | -0.583850 | -3.223030 |
| N  | 2.413227  | -0.812255 | -0.257498 |
| N  | 0.848319  | 1.329706  | -0.200976 |
| C  | 3.122181  | -1.947415 | -0.199066 |
| H  | 2.543502  | -2.864251 | -0.164219 |
| C  | 4.510510  | -1.957158 | -0.169899 |
| H  | 5.045176  | -2.900312 | -0.116313 |
| C  | 5.180513  | -0.732549 | -0.192063 |
| H  | 6.266416  | -0.694716 | -0.160994 |
| C  | 4.444100  | 0.444849  | -0.239742 |
| H  | 4.946342  | 1.405392  | -0.233245 |
| C  | 3.045733  | 0.388948  | -0.268809 |
| C  | 2.180129  | 1.588428  | -0.285162 |
| C  | 2.666325  | 2.880941  | -0.367918 |
| H  | 3.727756  | 3.085831  | -0.433016 |
| C  | 1.723794  | 3.940443  | -0.374093 |
| H  | 2.076781  | 4.968058  | -0.429769 |

|   |           |           |           |
|---|-----------|-----------|-----------|
| C | 0.379512  | 3.682854  | -0.317810 |
| H | -0.345780 | 4.491802  | -0.331180 |
| C | -0.111276 | 2.329822  | -0.248782 |
| C | -1.463207 | 2.001109  | -0.227227 |
| H | -2.197143 | 2.801560  | -0.203664 |
| C | -2.728540 | 0.118385  | 1.764111  |
| C | -4.180705 | 0.619407  | 1.846333  |
| H | -4.272049 | 1.663112  | 1.522263  |
| H | -4.499472 | 0.577175  | 2.897230  |
| H | -4.885192 | 0.010935  | 1.273154  |
| C | -1.894405 | 0.984121  | 2.725142  |
| H | -0.869793 | 0.616710  | 2.756801  |
| H | -2.319637 | 0.901217  | 3.735277  |
| H | -1.899625 | 2.038586  | 2.430071  |
| C | -2.638450 | -1.351031 | 2.216434  |
| H | -3.154526 | -2.036672 | 1.536169  |
| H | -3.109877 | -1.453187 | 3.204562  |
| H | -1.591865 | -1.655577 | 2.308779  |
| C | -3.276783 | -0.107742 | -1.307059 |
| C | -4.316293 | 1.026997  | -1.411036 |
| H | -4.895071 | 1.174485  | -0.498969 |
| H | -5.024419 | 0.784701  | -2.215608 |
| H | -3.831450 | 1.974541  | -1.671302 |
| C | -3.955661 | -1.456855 | -1.017256 |
| H | -3.219782 | -2.263644 | -0.916283 |
| H | -4.615737 | -1.716557 | -1.856819 |
| H | -4.568668 | -1.441334 | -0.112402 |
| C | -2.590113 | -0.205347 | -2.678659 |
| H | -1.949501 | 0.661270  | -2.874085 |
| H | -3.359445 | -0.239106 | -3.462155 |
| H | -1.995982 | -1.118276 | -2.768834 |
| C | -0.349039 | -2.504997 | -0.137561 |
| C | 0.314525  | -0.626143 | -2.101996 |
| O | 0.515998  | -0.843889 | 1.885383  |
| N | 1.545996  | -0.003242 | 2.408464  |
| N | 2.643886  | -0.313687 | 2.724496  |

57

ts-5-6 el energy= -1361.71337133

|    |           |           |           |
|----|-----------|-----------|-----------|
| Ru | 0.261376  | -0.681876 | -0.164862 |
| H  | 1.200487  | 0.680225  | 3.146600  |
| P  | -1.948906 | 0.286391  | -0.038726 |
| O  | -0.637782 | -3.592700 | 0.153782  |
| O  | 0.603981  | -0.744648 | -3.176135 |
| N  | 2.429541  | -0.773041 | -0.227839 |

|   |           |           |           |
|---|-----------|-----------|-----------|
| N | 0.827003  | 1.340041  | -0.257832 |
| C | 3.159808  | -1.896297 | -0.212295 |
| H | 2.598570  | -2.823758 | -0.177003 |
| C | 4.547331  | -1.882623 | -0.218126 |
| H | 5.098873  | -2.817379 | -0.198777 |
| C | 5.196032  | -0.646152 | -0.227238 |
| H | 6.281582  | -0.589690 | -0.219136 |
| C | 4.438297  | 0.518007  | -0.243307 |
| H | 4.923958  | 1.487087  | -0.245341 |
| C | 3.040447  | 0.438538  | -0.248836 |
| C | 2.154737  | 1.622080  | -0.284245 |
| C | 2.621832  | 2.922283  | -0.369506 |
| H | 3.681248  | 3.146282  | -0.387276 |
| C | 1.662104  | 3.962367  | -0.452643 |
| H | 1.998352  | 4.995325  | -0.514568 |
| C | 0.321926  | 3.678790  | -0.466603 |
| H | -0.416786 | 4.471993  | -0.542924 |
| C | -0.146311 | 2.318765  | -0.382472 |
| C | -1.492130 | 1.964949  | -0.420382 |
| H | -2.238617 | 2.753667  | -0.453524 |
| C | -2.747601 | 0.274551  | 1.718621  |
| C | -4.210092 | 0.751924  | 1.739300  |
| H | -4.322533 | 1.747874  | 1.294719  |
| H | -4.529968 | 0.827604  | 2.788214  |
| H | -4.900504 | 0.064922  | 1.242365  |
| C | -1.940693 | 1.268205  | 2.576699  |
| H | -0.882093 | 1.010695  | 2.556349  |
| H | -2.298814 | 1.207622  | 3.614464  |
| H | -2.068838 | 2.296755  | 2.224058  |
| C | -2.641237 | -1.136765 | 2.325591  |
| H | -3.145932 | -1.893930 | 1.715916  |
| H | -3.121476 | -1.140528 | 3.315045  |
| H | -1.592456 | -1.418107 | 2.453460  |
| C | -3.264605 | -0.269434 | -1.319198 |
| C | -4.320155 | 0.832505  | -1.542518 |
| H | -4.918240 | 1.048808  | -0.656962 |
| H | -5.009241 | 0.507431  | -2.334424 |
| H | -3.845974 | 1.762052  | -1.877096 |
| C | -3.925409 | -1.593700 | -0.900699 |
| H | -3.178101 | -2.373891 | -0.712282 |
| H | -4.573205 | -1.947554 | -1.715075 |
| H | -4.547237 | -1.497088 | -0.006932 |
| C | -2.565381 | -0.493103 | -2.669366 |
| H | -1.949658 | 0.366619  | -2.953998 |
| H | -3.327584 | -0.633957 | -3.447958 |

|   |           |           |           |
|---|-----------|-----------|-----------|
| H | -1.943567 | -1.392216 | -2.658281 |
| C | -0.289481 | -2.505355 | 0.024750  |
| C | 0.349166  | -0.730293 | -2.054489 |
| O | 0.384912  | -0.625859 | 1.950647  |
| N | 1.551005  | -0.132739 | 2.595380  |
| N | 2.658220  | -0.552829 | 2.593234  |

57

ts-4b-6      el energy= -1361.68522375

|    |           |           |           |
|----|-----------|-----------|-----------|
| Ru | 0.202445  | -0.663399 | -0.332479 |
| H  | 1.149902  | -1.169819 | 3.085875  |
| P  | -1.961584 | 0.287431  | 0.056235  |
| O  | -0.704096 | -3.578543 | -0.255679 |
| O  | 0.303612  | -0.366415 | -3.375844 |
| N  | 2.389605  | -0.726919 | -0.448144 |
| N  | 0.771079  | 1.371145  | -0.242885 |
| C  | 3.131175  | -1.841210 | -0.490654 |
| H  | 2.578757  | -2.771041 | -0.584222 |
| C  | 4.518742  | -1.820233 | -0.412896 |
| H  | 5.079676  | -2.749218 | -0.448968 |
| C  | 5.152742  | -0.582654 | -0.283173 |
| H  | 6.235640  | -0.519315 | -0.211278 |
| C  | 4.382250  | 0.572346  | -0.236414 |
| H  | 4.854760  | 1.540076  | -0.113408 |
| C  | 2.986211  | 0.484647  | -0.320898 |
| C  | 2.092713  | 1.661233  | -0.267886 |
| C  | 2.559176  | 2.966464  | -0.270732 |
| H  | 3.617511  | 3.194179  | -0.306344 |
| C  | 1.596892  | 4.006380  | -0.255067 |
| H  | 1.929167  | 5.042590  | -0.254260 |
| C  | 0.257204  | 3.718250  | -0.246315 |
| H  | -0.485154 | 4.511866  | -0.238027 |
| C  | -0.204748 | 2.353690  | -0.247238 |
| C  | -1.549654 | 1.993742  | -0.249642 |
| H  | -2.301230 | 2.774634  | -0.175117 |
| C  | -2.543833 | 0.144407  | 1.884878  |
| C  | -3.964851 | 0.681663  | 2.122477  |
| H  | -4.078683 | 1.710493  | 1.759872  |
| H  | -4.153485 | 0.696094  | 3.205526  |
| H  | -4.743621 | 0.061406  | 1.668225  |
| C  | -1.571913 | 1.014835  | 2.707785  |
| H  | -0.538531 | 0.708654  | 2.524108  |
| H  | -1.801484 | 0.879060  | 3.775521  |
| H  | -1.686031 | 2.076287  | 2.463943  |
| C  | -2.439165 | -1.317593 | 2.354393  |

|   |           |           |           |
|---|-----------|-----------|-----------|
| H | -3.078030 | -1.993988 | 1.777353  |
| H | -2.758455 | -1.382708 | 3.405378  |
| H | -1.401320 | -1.655616 | 2.285557  |
| C | -3.409749 | -0.172950 | -1.108349 |
| C | -4.467005 | 0.948670  | -1.146213 |
| H | -4.951997 | 1.119067  | -0.183771 |
| H | -5.249871 | 0.674429  | -1.867306 |
| H | -4.021938 | 1.891646  | -1.482399 |
| C | -4.049182 | -1.512237 | -0.705739 |
| H | -3.301878 | -2.311543 | -0.635406 |
| H | -4.778907 | -1.808836 | -1.472445 |
| H | -4.581280 | -1.457592 | 0.248034  |
| C | -2.854329 | -0.316386 | -2.534425 |
| H | -2.278634 | 0.565771  | -2.833038 |
| H | -3.693138 | -0.426988 | -3.235681 |
| H | -2.222381 | -1.203231 | -2.634856 |
| C | -0.352827 | -2.482733 | -0.306175 |
| C | 0.154238  | -0.479311 | -2.239498 |
| O | 0.593116  | -0.855953 | 1.670703  |
| N | 2.088954  | -0.794489 | 2.766600  |
| N | 3.191966  | -0.540750 | 2.704422  |

57

Complex-6 el energy= -1361.71640790

|    |           |           |           |
|----|-----------|-----------|-----------|
| Ru | 0.252895  | -0.701758 | -0.251598 |
| H  | 1.361880  | -1.178452 | 3.512373  |
| P  | -1.916942 | 0.305386  | -0.003373 |
| O  | -0.748689 | -3.595918 | -0.299617 |
| O  | 0.467107  | -0.384993 | -3.261636 |
| N  | 2.425581  | -0.820105 | -0.281635 |
| N  | 0.852082  | 1.322399  | -0.231236 |
| C  | 3.139325  | -1.951714 | -0.218034 |
| H  | 2.567146  | -2.873339 | -0.253574 |
| C  | 4.524822  | -1.955233 | -0.106456 |
| H  | 5.063953  | -2.896369 | -0.058255 |
| C  | 5.184167  | -0.724946 | -0.055098 |
| H  | 6.266355  | -0.680393 | 0.039266  |
| C  | 4.441636  | 0.447946  | -0.115423 |
| H  | 4.932302  | 1.411821  | -0.046718 |
| C  | 3.047157  | 0.385890  | -0.223771 |
| C  | 2.181291  | 1.580529  | -0.282842 |
| C  | 2.670914  | 2.867809  | -0.405353 |
| H  | 3.733870  | 3.069117  | -0.456772 |
| C  | 1.730766  | 3.926026  | -0.472480 |
| H  | 2.084530  | 4.951908  | -0.551679 |

|   |           |           |           |
|---|-----------|-----------|-----------|
| C | 0.385798  | 3.666358  | -0.449035 |
| H | -0.341320 | 4.471320  | -0.512732 |
| C | -0.101804 | 2.314771  | -0.355602 |
| C | -1.454781 | 1.979043  | -0.391301 |
| H | -2.192634 | 2.776003  | -0.403808 |
| C | -2.569081 | 0.286460  | 1.804703  |
| C | -3.960082 | 0.928223  | 1.942462  |
| H | -3.996691 | 1.928107  | 1.493111  |
| H | -4.185612 | 1.043264  | 3.012271  |
| H | -4.758293 | 0.317978  | 1.508617  |
| C | -1.578894 | 1.151484  | 2.610305  |
| H | -0.546578 | 0.839634  | 2.455077  |
| H | -1.812247 | 1.050881  | 3.679944  |
| H | -1.663387 | 2.207963  | 2.336718  |
| C | -2.584623 | -1.144126 | 2.372188  |
| H | -3.244101 | -1.813613 | 1.811403  |
| H | -2.956444 | -1.112743 | 3.407149  |
| H | -1.572836 | -1.557761 | 2.382867  |
| C | -3.324488 | -0.203790 | -1.197520 |
| C | -4.342177 | 0.942066  | -1.366908 |
| H | -4.864088 | 1.195231  | -0.442445 |
| H | -5.100139 | 0.637575  | -2.102208 |
| H | -3.852956 | 1.845062  | -1.748047 |
| C | -4.027894 | -1.487456 | -0.726956 |
| H | -3.315058 | -2.302775 | -0.556124 |
| H | -4.728767 | -1.819702 | -1.505701 |
| H | -4.604762 | -1.339530 | 0.190018  |
| C | -2.711502 | -0.470927 | -2.581509 |
| H | -2.120977 | 0.381805  | -2.931042 |
| H | -3.521294 | -0.639044 | -3.304860 |
| H | -2.081274 | -1.365589 | -2.581230 |
| C | -0.356627 | -2.515213 | -0.284960 |
| C | 0.279393  | -0.506986 | -2.134131 |
| O | 0.454591  | -1.156897 | 1.824165  |
| N | 1.442110  | -0.584326 | 2.657561  |
| N | 2.173399  | 0.332516  | 2.493924  |

57

ts-1b-2c el energy= -1361.69121343

|    |           |           |           |
|----|-----------|-----------|-----------|
| Ru | -0.283607 | -0.519430 | 0.413688  |
| H  | -0.624867 | -0.455517 | -1.412996 |
| P  | 1.903740  | 0.327903  | -0.053389 |
| O  | 0.653548  | -3.374208 | 0.997989  |
| O  | -0.616669 | 0.313924  | 3.340233  |
| N  | -2.446347 | -0.592832 | 0.375300  |



|   |           |           |           |
|---|-----------|-----------|-----------|
| N | -0.833563 | 1.458380  | -0.074506 |
| C | -3.190575 | -1.691230 | 0.585039  |
| H | -2.638458 | -2.596102 | 0.813540  |
| C | -4.576499 | -1.681564 | 0.497611  |
| H | -5.135555 | -2.595908 | 0.670840  |
| C | -5.212318 | -0.479454 | 0.176664  |
| H | -6.294990 | -0.429967 | 0.092102  |
| C | -4.443270 | 0.657549  | -0.037770 |
| H | -4.916458 | 1.597820  | -0.296739 |
| C | -3.047667 | 0.588417  | 0.067611  |
| C | -2.156054 | 1.745437  | -0.147321 |
| C | -2.613862 | 3.029243  | -0.398257 |
| H | -3.671498 | 3.257696  | -0.447167 |
| C | -1.645604 | 4.047574  | -0.575553 |
| H | -1.971579 | 5.066475  | -0.773811 |
| C | -0.307035 | 3.760893  | -0.500716 |
| H | 0.438987  | 4.539007  | -0.637789 |
| C | 0.149081  | 2.419853  | -0.242410 |
| C | 1.491085  | 2.058124  | -0.160777 |
| H | 2.250724  | 2.810025  | -0.354713 |
| C | 2.640017  | -0.221843 | -1.755827 |
| C | 4.094840  | 0.234940  | -1.965912 |
| H | 4.200772  | 1.319774  | -1.846474 |
| H | 4.392818  | -0.009288 | -2.995248 |
| H | 4.804747  | -0.262198 | -1.299723 |
| C | 1.801274  | 0.453225  | -2.856662 |
| H | 0.749152  | 0.169868  | -2.819542 |
| H | 2.192695  | 0.141281  | -3.835289 |
| H | 1.863318  | 1.544326  | -2.791573 |
| C | 2.541160  | -1.749127 | -1.904900 |
| H | 3.126199  | -2.284460 | -1.150295 |
| H | 2.924371  | -2.044999 | -2.891774 |
| H | 1.504701  | -2.090384 | -1.831897 |
| C | 3.262882  | 0.145777  | 1.290677  |
| C | 4.329985  | 1.251238  | 1.160625  |
| H | 4.891520  | 1.207614  | 0.226806  |
| H | 5.050630  | 1.147147  | 1.983802  |
| H | 3.873005  | 2.243607  | 1.243923  |
| C | 3.906059  | -1.250737 | 1.254148  |
| H | 3.151016  | -2.043608 | 1.310035  |
| H | 4.569776  | -1.365294 | 2.122789  |
| H | 4.510791  | -1.417750 | 0.358691  |
| C | 2.600018  | 0.328314  | 2.665668  |
| H | 1.997734  | 1.242315  | 2.705352  |
| H | 3.382847  | 0.406360  | 3.432617  |

|   |           |           |           |
|---|-----------|-----------|-----------|
| H | 1.970372  | -0.526552 | 2.926457  |
| C | 0.267336  | -2.320594 | 0.733560  |
| C | -0.364982 | -0.015615 | 2.268429  |
| N | -1.020882 | -2.779768 | -1.543789 |
| N | -1.379436 | -2.046118 | -2.384048 |
| O | -1.294855 | -0.786600 | -2.517927 |

57

Complex-2c      el energy= -  
1361.74167741

|    |           |           |           |
|----|-----------|-----------|-----------|
| Ru | 0.254605  | -0.728735 | -0.241612 |
| H  | 1.314345  | 1.094749  | 1.849605  |
| P  | -1.904521 | 0.303112  | 0.013998  |
| O  | -0.811193 | -3.597783 | -0.423043 |
| O  | 0.547195  | -0.320297 | -3.252810 |
| N  | 2.425139  | -0.872600 | -0.233246 |
| N  | 0.880619  | 1.290570  | -0.225163 |
| C  | 3.122274  | -2.011400 | -0.104097 |
| H  | 2.538698  | -2.926099 | -0.110582 |
| C  | 4.502933  | -2.026482 | 0.042691  |
| H  | 5.026531  | -2.971631 | 0.147052  |
| C  | 5.179161  | -0.803987 | 0.065970  |
| H  | 6.258237  | -0.770811 | 0.192599  |
| C  | 4.455734  | 0.374973  | -0.058306 |
| H  | 4.955101  | 1.335614  | -0.007381 |
| C  | 3.064575  | 0.325071  | -0.206877 |
| C  | 2.218453  | 1.527737  | -0.334269 |
| C  | 2.717621  | 2.799178  | -0.530213 |
| H  | 3.781141  | 2.982185  | -0.622489 |
| C  | 1.787716  | 3.868850  | -0.612546 |
| H  | 2.153747  | 4.884488  | -0.745667 |
| C  | 0.441774  | 3.633249  | -0.532381 |
| H  | -0.274146 | 4.447289  | -0.604234 |
| C  | -0.065812 | 2.294036  | -0.371851 |
| C  | -1.419402 | 1.977504  | -0.359623 |
| H  | -2.147772 | 2.782785  | -0.379290 |
| C  | -2.596298 | 0.265745  | 1.809062  |
| C  | -4.008096 | 0.870214  | 1.916604  |
| H  | -4.052811 | 1.882011  | 1.496178  |
| H  | -4.270140 | 0.948872  | 2.980871  |
| H  | -4.777536 | 0.256294  | 1.439854  |
| C  | -1.666870 | 1.152104  | 2.661226  |
| H  | -0.616327 | 0.866305  | 2.622066  |
| H  | -1.981923 | 1.076940  | 3.711145  |
| H  | -1.741245 | 2.201704  | 2.357747  |

|   |           |           |           |
|---|-----------|-----------|-----------|
| C | -2.601714 | -1.173077 | 2.355765  |
| H | -3.264619 | -1.833386 | 1.787647  |
| H | -2.962970 | -1.159348 | 3.393670  |
| H | -1.598149 | -1.605882 | 2.359488  |
| C | -3.294246 | -0.179365 | -1.216315 |
| C | -4.307627 | 0.971412  | -1.381928 |
| H | -4.845305 | 1.210736  | -0.463435 |
| H | -5.053206 | 0.680031  | -2.134731 |
| H | -3.811758 | 1.879897  | -1.740871 |
| C | -4.004985 | -1.472767 | -0.784190 |
| H | -3.295715 | -2.292526 | -0.621645 |
| H | -4.694201 | -1.786845 | -1.580445 |
| H | -4.595786 | -1.346358 | 0.126754  |
| C | -2.660807 | -0.418211 | -2.596300 |
| H | -2.060646 | 0.439032  | -2.917732 |
| H | -3.460623 | -0.563443 | -3.335248 |
| H | -2.037625 | -1.317555 | -2.608930 |
| C | -0.392930 | -2.530743 | -0.343172 |
| C | 0.314051  | -0.501070 | -2.144275 |
| N | 0.578877  | -1.208020 | 1.832289  |
| N | 1.222829  | -0.813195 | 2.728773  |
| O | 1.815826  | 0.754013  | 2.608422  |

57

ts-1-2d el energy= -1361.68649914

|    |           |           |           |
|----|-----------|-----------|-----------|
| Ru | 0.286248  | -0.582112 | -0.390439 |
| H  | 0.227655  | -1.770623 | 1.081263  |
| P  | -1.897481 | 0.320578  | 0.030666  |
| O  | -0.679812 | -3.416825 | -0.974536 |
| O  | 0.601111  | 0.156622  | -3.351195 |
| N  | 2.447088  | -0.670744 | -0.365417 |
| N  | 0.854406  | 1.412215  | 0.032623  |
| C  | 3.180258  | -1.785001 | -0.517186 |
| H  | 2.620881  | -2.693235 | -0.715826 |
| C  | 4.565194  | -1.788219 | -0.414543 |
| H  | 5.115042  | -2.716024 | -0.538816 |
| C  | 5.211749  | -0.579573 | -0.142986 |
| H  | 6.293927  | -0.538643 | -0.048383 |
| C  | 4.453599  | 0.573985  | 0.012756  |
| H  | 4.934201  | 1.518889  | 0.239206  |
| C  | 3.058266  | 0.516547  | -0.100208 |
| C  | 2.179025  | 1.690709  | 0.060443  |
| C  | 2.652413  | 2.985264  | 0.210956  |
| H  | 3.712710  | 3.206742  | 0.219011  |
| C  | 1.696694  | 4.020594  | 0.340827  |

|   |           |           |           |
|---|-----------|-----------|-----------|
| H | 2.033724  | 5.046789  | 0.471796  |
| C | 0.354065  | 3.742318  | 0.297554  |
| H | -0.383801 | 4.534457  | 0.391991  |
| C | -0.114756 | 2.394228  | 0.116905  |
| C | -1.461296 | 2.045862  | 0.021328  |
| H | -2.214078 | 2.815090  | 0.168257  |
| C | -2.630444 | -0.079724 | 1.768972  |
| C | -4.041456 | 0.502325  | 1.966203  |
| H | -4.078755 | 1.571947  | 1.727870  |
| H | -4.318449 | 0.394721  | 3.024454  |
| H | -4.805001 | -0.015893 | 1.378701  |
| C | -1.705433 | 0.611244  | 2.787624  |
| H | -0.655775 | 0.355886  | 2.634544  |
| H | -1.991314 | 0.295113  | 3.800714  |
| H | -1.792965 | 1.700718  | 2.725959  |
| C | -2.648267 | -1.592933 | 2.042430  |
| H | -3.233973 | -2.151592 | 1.306346  |
| H | -3.100811 | -1.773356 | 3.027903  |
| H | -1.638080 | -2.008489 | 2.065977  |
| C | -3.264499 | 0.061872  | -1.292044 |
| C | -4.294309 | 1.209033  | -1.256846 |
| H | -4.856696 | 1.258265  | -0.323272 |
| H | -5.018049 | 1.060804  | -2.070505 |
| H | -3.805329 | 2.175871  | -1.418821 |
| C | -3.960064 | -1.299717 | -1.128197 |
| H | -3.238253 | -2.124809 | -1.109683 |
| H | -4.629724 | -1.467345 | -1.983528 |
| H | -4.569323 | -1.356961 | -0.222037 |
| C | -2.604478 | 0.097443  | -2.679367 |
| H | -2.002538 | 1.001995  | -2.814496 |
| H | -3.388837 | 0.097223  | -3.448744 |
| H | -1.975498 | -0.780631 | -2.852278 |
| C | -0.293541 | -2.353501 | -0.748482 |
| C | 0.378973  | -0.057403 | -2.245490 |
| N | 1.437112  | -0.315680 | 2.206512  |
| N | 1.370201  | -1.393377 | 2.664920  |
| O | 0.778028  | -2.433753 | 2.279151  |

57

Complex-2d el energy= -1361.83159111

|    |           |           |           |
|----|-----------|-----------|-----------|
| Ru | 0.346496  | -0.562460 | -0.107028 |
| H  | 0.263597  | -4.305714 | 0.382684  |
| P  | -1.851152 | 0.393484  | -0.013412 |
| O  | -1.080921 | -3.101400 | -0.884056 |
| O  | 0.631147  | -0.546001 | -3.107257 |

|   |           |           |           |
|---|-----------|-----------|-----------|
| N | 2.529621  | -0.624318 | -0.069787 |
| N | 0.911168  | 1.497540  | -0.052681 |
| C | 3.271095  | -1.742803 | -0.035793 |
| H | 2.705478  | -2.669504 | -0.055310 |
| C | 4.658879  | -1.710366 | 0.047929  |
| H | 5.222212  | -2.638326 | 0.071301  |
| C | 5.290233  | -0.466166 | 0.109806  |
| H | 6.372824  | -0.396695 | 0.183631  |
| C | 4.518923  | 0.690612  | 0.083724  |
| H | 4.991086  | 1.664503  | 0.146769  |
| C | 3.123807  | 0.599889  | -0.012947 |
| C | 2.233560  | 1.783012  | -0.068267 |
| C | 2.704711  | 3.083619  | -0.166176 |
| H | 3.763726  | 3.310610  | -0.190465 |
| C | 1.741556  | 4.119217  | -0.271386 |
| H | 2.074782  | 5.152961  | -0.338744 |
| C | 0.401976  | 3.830521  | -0.307134 |
| H | -0.336175 | 4.621732  | -0.409829 |
| C | -0.061549 | 2.466992  | -0.232179 |
| C | -1.399459 | 2.094357  | -0.331757 |
| H | -2.153696 | 2.872983  | -0.403990 |
| C | -2.600484 | 0.375158  | 1.765173  |
| C | -3.997557 | 1.016902  | 1.841559  |
| H | -4.001883 | 2.024375  | 1.409095  |
| H | -4.287865 | 1.112818  | 2.898002  |
| H | -4.768301 | 0.420519  | 1.346127  |
| C | -1.672279 | 1.249245  | 2.635438  |
| H | -0.613482 | 1.014448  | 2.515272  |
| H | -1.932250 | 1.111079  | 3.694307  |
| H | -1.791141 | 2.307370  | 2.384018  |
| C | -2.665926 | -1.059715 | 2.318499  |
| H | -3.389638 | -1.674414 | 1.776859  |
| H | -2.974929 | -1.034142 | 3.373414  |
| H | -1.702613 | -1.572250 | 2.263291  |
| C | -3.214574 | -0.094558 | -1.264057 |
| C | -4.187952 | 1.073808  | -1.509679 |
| H | -4.742452 | 1.370592  | -0.616419 |
| H | -4.922596 | 0.766456  | -2.267206 |
| H | -3.658879 | 1.951666  | -1.896533 |
| C | -3.970448 | -1.355878 | -0.812000 |
| H | -3.275152 | -2.174518 | -0.602232 |
| H | -4.631814 | -1.680780 | -1.627885 |
| H | -4.602081 | -1.180511 | 0.063710  |
| C | -2.522572 | -0.418733 | -2.597622 |
| H | -1.894718 | 0.411299  | -2.938954 |

|   |           |           |           |
|---|-----------|-----------|-----------|
| H | -3.291487 | -0.591142 | -3.363933 |
| H | -1.924493 | -1.329517 | -2.510733 |
| C | -0.197223 | -2.567494 | -0.238109 |
| C | 0.417630  | -0.535356 | -1.977512 |
| N | 0.641179  | -0.884970 | 1.941365  |
| N | 0.989703  | -1.159493 | 2.956767  |
| O | 0.610725  | -3.404450 | 0.532496  |

3  
N2O (SMD-BS2) el energy= -  
184.730064615

|   |          |          |           |
|---|----------|----------|-----------|
| N | 0.000000 | 0.000000 | -1.195122 |
| N | 0.000000 | 0.000000 | -0.073969 |
| O | 0.000000 | 0.000000 | 1.110454  |

3  
H2O (SMD-BS2) el energy= -  
76.4681404508

|   |          |           |           |
|---|----------|-----------|-----------|
| O | 0.000000 | 0.000000  | 0.118311  |
| H | 0.000000 | -0.762618 | -0.473245 |
| H | 0.000000 | 0.762618  | -0.473245 |

54  
Complex-1 (SMD-BS2) el energy= -  
1513.42208414

|    |           |           |           |
|----|-----------|-----------|-----------|
| Ru | -0.362015 | -0.716405 | -0.003231 |
| H  | -0.344198 | -0.561561 | -1.635599 |
| P  | 1.790265  | 0.271386  | -0.057657 |
| O  | 0.509984  | -3.570043 | -0.463172 |
| O  | -0.934770 | -1.073552 | 3.011177  |
| N  | -2.493166 | -0.820606 | -0.241176 |
| N  | -0.962884 | 1.295070  | 0.098487  |
| C  | -3.195820 | -1.944495 | -0.437608 |
| H  | -2.629771 | -2.864102 | -0.463531 |
| C  | -4.568730 | -1.941008 | -0.603071 |
| H  | -5.092406 | -2.873744 | -0.760461 |
| C  | -5.240299 | -0.724216 | -0.564410 |
| H  | -6.313799 | -0.681453 | -0.694608 |
| C  | -4.516841 | 0.437987  | -0.360051 |
| H  | -5.019172 | 1.393141  | -0.330434 |
| C  | -3.133647 | 0.374408  | -0.194213 |
| C  | -2.284885 | 1.560497  | 0.028892  |
| C  | -2.782285 | 2.842722  | 0.161983  |
| H  | -3.840102 | 3.047911  | 0.112285  |
| C  | -1.853557 | 3.885176  | 0.371921  |

|   |           |           |           |
|---|-----------|-----------|-----------|
| H | -2.211691 | 4.902150  | 0.480198  |
| C | -0.514271 | 3.626402  | 0.435101  |
| H | 0.199365  | 4.425095  | 0.590209  |
| C | -0.016845 | 2.286239  | 0.292410  |
| C | 1.324973  | 1.947305  | 0.331491  |
| H | 2.064117  | 2.730704  | 0.425916  |
| C | 2.579820  | 0.293947  | -1.814880 |
| C | 3.986871  | 0.902273  | -1.831412 |
| H | 4.004642  | 1.896181  | -1.381691 |
| H | 4.307543  | 1.009399  | -2.872248 |
| H | 4.724038  | 0.278087  | -1.329936 |
| C | 1.687849  | 1.178229  | -2.697264 |
| H | 0.649589  | 0.849039  | -2.688549 |
| H | 2.052214  | 1.123493  | -3.727498 |
| H | 1.719847  | 2.220180  | -2.379016 |
| C | 2.614500  | -1.119518 | -2.407361 |
| H | 3.202727  | -1.813775 | -1.809459 |
| H | 3.065786  | -1.076974 | -3.403505 |
| H | 1.609767  | -1.525428 | -2.515616 |
| C | 3.109258  | -0.249663 | 1.227028  |
| C | 4.115995  | 0.880364  | 1.488208  |
| H | 4.688963  | 1.157783  | 0.608229  |
| H | 4.824891  | 0.545886  | 2.251513  |
| H | 3.617652  | 1.771983  | 1.869928  |
| C | 3.835436  | -1.526902 | 0.793139  |
| H | 3.133488  | -2.330086 | 0.562965  |
| H | 4.471750  | -1.870976 | 1.614028  |
| H | 4.476091  | -1.371064 | -0.072752 |
| C | 2.385401  | -0.533711 | 2.547067  |
| H | 1.733552  | 0.290805  | 2.839282  |
| H | 3.130193  | -0.667299 | 3.336751  |
| H | 1.798257  | -1.448392 | 2.491001  |
| C | 0.183734  | -2.479812 | -0.274440 |
| C | -0.609655 | -0.909300 | 1.924871  |

57

ts-1-2 (SMD-BS2) el energy= -  
1698.12888977

|    |           |           |           |
|----|-----------|-----------|-----------|
| Ru | 0.284410  | -0.430064 | -0.436593 |
| H  | 0.519304  | -0.796976 | 1.276140  |
| P  | -1.921382 | 0.310845  | 0.063909  |
| O  | -0.492039 | -3.268569 | -1.176186 |
| O  | 0.565600  | 0.408259  | -3.340307 |
| N  | 2.428098  | -0.446935 | -0.411933 |
| N  | 0.761129  | 1.514538  | 0.157326  |

|   |           |           |           |
|---|-----------|-----------|-----------|
| C | 3.200324  | -1.501943 | -0.708015 |
| H | 2.685735  | -2.401395 | -1.010333 |
| C | 4.579160  | -1.453501 | -0.622548 |
| H | 5.162085  | -2.330796 | -0.866069 |
| C | 5.179531  | -0.267366 | -0.215191 |
| H | 6.255867  | -0.195262 | -0.129139 |
| C | 4.383848  | 0.825616  | 0.082114  |
| H | 4.832475  | 1.753887  | 0.402786  |
| C | 2.997904  | 0.723231  | -0.027240 |
| C | 2.072210  | 1.836113  | 0.255616  |
| C | 2.486976  | 3.112152  | 0.574088  |
| H | 3.533128  | 3.364192  | 0.646421  |
| C | 1.491804  | 4.090992  | 0.792313  |
| H | 1.787934  | 5.102015  | 1.045248  |
| C | 0.168090  | 3.776652  | 0.688955  |
| H | -0.595228 | 4.525386  | 0.855453  |
| C | -0.248100 | 2.441859  | 0.358129  |
| C | -1.570098 | 2.048130  | 0.243189  |
| H | -2.354466 | 2.760991  | 0.456045  |
| C | -2.567615 | -0.324511 | 1.763202  |
| C | -4.018876 | 0.081522  | 2.044278  |
| H | -4.161831 | 1.159700  | 1.959682  |
| H | -4.261173 | -0.198907 | 3.073918  |
| H | -4.734586 | -0.418822 | 1.395184  |
| C | -1.698850 | 0.325822  | 2.848584  |
| H | -0.635631 | 0.173618  | 2.686893  |
| H | -1.955430 | -0.122048 | 3.813092  |
| H | -1.882379 | 1.398028  | 2.911806  |
| C | -2.429042 | -1.848844 | 1.844275  |
| H | -3.006855 | -2.362593 | 1.077434  |
| H | -2.793816 | -2.190140 | 2.817694  |
| H | -1.390666 | -2.162956 | 1.751703  |
| C | -3.297232 | 0.136756  | -1.250372 |
| C | -4.393990 | 1.193128  | -1.050454 |
| H | -4.922767 | 1.089840  | -0.107709 |
| H | -5.128157 | 1.086639  | -1.854325 |
| H | -3.985840 | 2.202628  | -1.109903 |
| C | -3.897945 | -1.272654 | -1.245877 |
| H | -3.128840 | -2.039385 | -1.347455 |
| H | -4.573672 | -1.370334 | -2.100618 |
| H | -4.475469 | -1.482342 | -0.347961 |
| C | -2.667878 | 0.382674  | -2.624912 |
| H | -2.107205 | 1.317683  | -2.654943 |
| H | -3.465870 | 0.447289  | -3.369623 |
| H | -2.015416 | -0.437901 | -2.917633 |

|   |           |           |           |
|---|-----------|-----------|-----------|
| C | -0.173771 | -2.212898 | -0.852723 |
| C | 0.336738  | 0.095564  | -2.261558 |
| N | 1.292466  | -1.220430 | 2.383860  |
| N | 1.527823  | -2.359170 | 2.239721  |
| O | 1.356405  | -3.284552 | 1.453961  |

57

ts-2-3 (SMD-BS2) el energy= -  
1698.16700359

|    |           |           |           |
|----|-----------|-----------|-----------|
| Ru | 0.263867  | -0.704164 | -0.113484 |
| H  | 1.274656  | 1.472840  | 2.308293  |
| P  | -1.928019 | 0.287278  | -0.059632 |
| O  | -0.631790 | -3.578977 | 0.292641  |
| O  | 0.648131  | -1.017169 | -3.058792 |
| N  | 2.411505  | -0.843339 | -0.128857 |
| N  | 0.860854  | 1.280843  | -0.325695 |
| C  | 3.115579  | -1.974941 | 0.003412  |
| H  | 2.546212  | -2.885589 | 0.116793  |
| C  | 4.497515  | -1.985530 | 0.004433  |
| H  | 5.026940  | -2.920961 | 0.119175  |
| C  | 5.171061  | -0.777523 | -0.137772 |
| H  | 6.252828  | -0.746789 | -0.137903 |
| C  | 4.443596  | 0.391644  | -0.275795 |
| H  | 4.950555  | 1.339103  | -0.378792 |
| C  | 3.051168  | 0.343421  | -0.269076 |
| C  | 2.191486  | 1.534433  | -0.405231 |
| C  | 2.677190  | 2.806725  | -0.606310 |
| H  | 3.735801  | 3.004821  | -0.663554 |
| C  | 1.738588  | 3.855901  | -0.740780 |
| H  | 2.093111  | 4.868974  | -0.887743 |
| C  | 0.399355  | 3.605563  | -0.693171 |
| H  | -0.320452 | 4.405742  | -0.804544 |
| C  | -0.094826 | 2.268989  | -0.501197 |
| C  | -1.438967 | 1.945274  | -0.481164 |
| H  | -2.171323 | 2.734813  | -0.574862 |
| C  | -2.748136 | 0.332264  | 1.684060  |
| C  | -4.199974 | 0.825160  | 1.660858  |
| H  | -4.288259 | 1.811829  | 1.204587  |
| H  | -4.538587 | 0.915972  | 2.697412  |
| H  | -4.882268 | 0.143341  | 1.158764  |
| C  | -1.956383 | 1.326751  | 2.544055  |
| H  | -0.905220 | 1.061782  | 2.592515  |
| H  | -2.363121 | 1.302372  | 3.559611  |
| H  | -2.051023 | 2.344234  | 2.164387  |
| C  | -2.679422 | -1.063801 | 2.316637  |

|   |           |           |           |
|---|-----------|-----------|-----------|
| H | -3.194294 | -1.817353 | 1.721585  |
| H | -3.165327 | -1.032273 | 3.296800  |
| H | -1.646746 | -1.374895 | 2.464228  |
| C | -3.225475 | -0.278282 | -1.349091 |
| C | -4.249728 | 0.834879  | -1.619515 |
| H | -4.840792 | 1.101727  | -0.749561 |
| H | -4.940398 | 0.486836  | -2.392802 |
| H | -3.761784 | 1.734903  | -1.995365 |
| C | -3.921845 | -1.569674 | -0.906946 |
| H | -3.201044 | -2.360401 | -0.692566 |
| H | -4.562450 | -1.921812 | -1.720681 |
| H | -4.551645 | -1.434854 | -0.030801 |
| C | -2.505977 | -0.555650 | -2.671849 |
| H | -1.862791 | 0.273112  | -2.969787 |
| H | -3.255354 | -0.690789 | -3.456369 |
| H | -1.921838 | -1.472512 | -2.626642 |
| C | -0.300361 | -2.493343 | 0.139156  |
| C | 0.365285  | -0.895852 | -1.952938 |
| N | 1.980562  | 0.847412  | 2.737917  |
| N | 1.636576  | -0.334981 | 2.597385  |
| O | 0.439898  | -0.551121 | 2.009866  |

57

ts-3-4 (SMD-BS2) el energy= -  
1698.12498014

|    |           |           |           |
|----|-----------|-----------|-----------|
| Ru | 0.281705  | -0.514283 | -0.381776 |
| H  | 1.746025  | -0.818527 | 2.432729  |
| P  | -1.930346 | 0.287789  | 0.055636  |
| O  | -0.509386 | -3.391684 | -0.942588 |
| O  | 0.524869  | 0.212602  | -3.293342 |
| N  | 2.439623  | -0.536857 | -0.449126 |
| N  | 0.782200  | 1.459196  | 0.063554  |
| C  | 3.199242  | -1.610026 | -0.697521 |
| H  | 2.676146  | -2.515531 | -0.969053 |
| C  | 4.578762  | -1.574468 | -0.602470 |
| H  | 5.154714  | -2.465909 | -0.808074 |
| C  | 5.186840  | -0.381194 | -0.230849 |
| H  | 6.262908  | -0.317665 | -0.135063 |
| C  | 4.400605  | 0.730553  | 0.022341  |
| H  | 4.856858  | 1.662835  | 0.319858  |
| C  | 3.014984  | 0.639070  | -0.099691 |
| C  | 2.097345  | 1.772885  | 0.130383  |
| C  | 2.525486  | 3.062247  | 0.362668  |
| H  | 3.574231  | 3.310077  | 0.405650  |
| C  | 1.540065  | 4.062853  | 0.523916  |

|                                |           |           |           |   |           |           |           |
|--------------------------------|-----------|-----------|-----------|---|-----------|-----------|-----------|
| H                              | 1.847275  | 5.084912  | 0.710684  | O | 0.424547  | -0.686033 | -3.361082 |
| C                              | 0.213418  | 3.756604  | 0.444578  | N | 2.355946  | -0.776298 | -0.350131 |
| H                              | -0.541771 | 4.522173  | 0.565120  | N | 0.796760  | 1.344969  | -0.309445 |
| C                              | -0.217847 | 2.407547  | 0.199150  | C | 3.070232  | -1.910505 | -0.338699 |
| C                              | -1.544916 | 2.026441  | 0.103973  | H | 2.507123  | -2.832048 | -0.336755 |
| H                              | -2.317203 | 2.765001  | 0.268133  | C | 4.452229  | -1.911638 | -0.324208 |
| C                              | -2.614389 | -0.201651 | 1.785496  | H | 4.987872  | -2.850499 | -0.309577 |
| C                              | -4.062551 | 0.248476  | 2.009618  | C | 5.117734  | -0.690627 | -0.327985 |
| H                              | -4.184387 | 1.319929  | 1.844479  | H | 6.199208  | -0.652222 | -0.315802 |
| H                              | -4.322348 | 0.048298  | 3.053745  | C | 4.381116  | 0.480923  | -0.344440 |
| H                              | -4.780339 | -0.285227 | 1.390383  | H | 4.881942  | 1.437330  | -0.341563 |
| C                              | -1.750247 | 0.516797  | 2.832311  | C | 2.988552  | 0.424151  | -0.352984 |
| H                              | -0.696867 | 0.280453  | 2.712205  | C | 2.121928  | 1.615246  | -0.352254 |
| H                              | -2.065154 | 0.181184  | 3.825510  | C | 2.599687  | 2.907560  | -0.392930 |
| H                              | -1.883875 | 1.597520  | 2.782663  | H | 3.657052  | 3.117975  | -0.419319 |
| C                              | -2.495436 | -1.718255 | 1.978280  | C | 1.655458  | 3.958571  | -0.405321 |
| H                              | -3.067129 | -2.279599 | 1.240622  | H | 2.002594  | 4.984421  | -0.434542 |
| H                              | -2.883809 | -1.983874 | 2.966601  | C | 0.317464  | 3.693737  | -0.380098 |
| H                              | -1.455148 | -2.033026 | 1.930606  | H | -0.409229 | 4.495487  | -0.390067 |
| C                              | -3.293378 | 0.031260  | -1.261207 | C | -0.163581 | 2.341175  | -0.331559 |
| C                              | -4.361486 | 1.130962  | -1.163383 | C | -1.504763 | 1.999811  | -0.296952 |
| H                              | -4.896415 | 1.129846  | -0.218745 | H | -2.249168 | 2.782732  | -0.262891 |
| H                              | -5.095094 | 0.971786  | -1.958900 | C | -2.529481 | 0.165729  | 1.822208  |
| H                              | -3.923609 | 2.118481  | -1.312575 | C | -3.929442 | 0.752106  | 2.035559  |
| C                              | -3.932578 | -1.356747 | -1.144484 | H | -4.003773 | 1.774200  | 1.661432  |
| H                              | -3.184424 | -2.149909 | -1.176053 | H | -4.129569 | 0.782106  | 3.110979  |
| H                              | -4.604359 | -1.505909 | -1.994740 | H | -4.713329 | 0.152395  | 1.576321  |
| H                              | -4.522004 | -1.478321 | -0.238578 | C | -1.549483 | 0.995089  | 2.663842  |
| C                              | -2.654365 | 0.142184  | -2.648116 | H | -0.509820 | 0.747757  | 2.463298  |
| H                              | -2.086208 | 1.065584  | -2.761779 | H | -1.744178 | 0.799900  | 3.722134  |
| H                              | -3.449471 | 0.146620  | -3.398806 | H | -1.678385 | 2.061973  | 2.483269  |
| H                              | -2.009436 | -0.707981 | -2.863301 | C | -2.498999 | -1.291762 | 2.296264  |
| C                              | -0.205865 | -2.307435 | -0.722178 | H | -3.140680 | -1.940652 | 1.702626  |
| C                              | 0.303243  | -0.066105 | -2.202203 | H | -2.853540 | -1.334670 | 3.330545  |
| N                              | 2.199898  | -1.966452 | 2.733634  | H | -1.489830 | -1.697760 | 2.278757  |
| N                              | 1.356248  | -2.398243 | 2.033714  | C | -3.369464 | -0.140203 | -1.187661 |
| O                              | 0.659977  | -0.961805 | 1.605202  | C | -4.400777 | 0.995921  | -1.248834 |
| 57                             |           |           |           | H | -4.886792 | 1.186639  | -0.296450 |
| ts-1-2b (SMD-BS2) el energy= - |           |           |           | H | -5.178278 | 0.719287  | -1.966693 |
| 1698.12517972                  |           |           |           | H | -3.945756 | 1.923500  | -1.597253 |
| Ru                             | 0.215852  | -0.663386 | -0.336934 | C | -4.042120 | -1.457566 | -0.789767 |
| H                              | 0.456350  | -0.925524 | 1.428982  | H | -3.318545 | -2.269856 | -0.703943 |
| P                              | -1.937681 | 0.298839  | -0.002983 | H | -4.758717 | -1.737128 | -1.567518 |
| O                              | -0.654637 | -3.557553 | -0.147986 | H | -4.589557 | -1.382452 | 0.147650  |
|                                |           |           |           | C | -2.783149 | -0.306153 | -2.593116 |

|   |           |           |           |
|---|-----------|-----------|-----------|
| H | -2.173549 | 0.550206  | -2.884205 |
| H | -3.605687 | -0.386876 | -3.309084 |
| H | -2.189777 | -1.215281 | -2.673563 |
| C | -0.327235 | -2.458859 | -0.230217 |
| C | 0.227223  | -0.636772 | -2.233234 |
| N | 1.046759  | -1.455521 | 2.558021  |
| N | 1.775471  | -0.646198 | 3.010606  |
| O | 2.182645  | 0.492486  | 2.794572  |

57

ts-2b-3b (SMD-BS2) el energy= -  
1698.16636626

|    |           |           |           |
|----|-----------|-----------|-----------|
| Ru | 0.295673  | -0.545693 | -0.302181 |
| H  | 1.285202  | -2.938353 | 1.864261  |
| P  | -1.939565 | 0.289217  | 0.019755  |
| O  | -0.511272 | -3.448854 | -0.685615 |
| O  | 0.580224  | -0.053674 | -3.235171 |
| N  | 2.439922  | -0.562073 | -0.369401 |
| N  | 0.779713  | 1.455401  | 0.002575  |
| C  | 3.202209  | -1.641165 | -0.586611 |
| H  | 2.680783  | -2.563141 | -0.798332 |
| C  | 4.582595  | -1.589538 | -0.533783 |
| H  | 5.160396  | -2.485535 | -0.712003 |
| C  | 5.189373  | -0.375472 | -0.234841 |
| H  | 6.266931  | -0.299444 | -0.170797 |
| C  | 4.401058  | 0.742394  | -0.019235 |
| H  | 4.856976  | 1.692372  | 0.216051  |
| C  | 3.014277  | 0.636282  | -0.099801 |
| C  | 2.093963  | 1.776024  | 0.070356  |
| C  | 2.515684  | 3.076695  | 0.237459  |
| H  | 3.563139  | 3.328621  | 0.286958  |
| C  | 1.526400  | 4.082641  | 0.324860  |
| H  | 1.829008  | 5.113758  | 0.462502  |
| C  | 0.202221  | 3.769883  | 0.233570  |
| H  | -0.556380 | 4.539047  | 0.294951  |
| C  | -0.222561 | 2.408167  | 0.056844  |
| C  | -1.548094 | 2.023320  | -0.047724 |
| H  | -2.321872 | 2.771907  | 0.048905  |
| C  | -2.667433 | -0.075016 | 1.763006  |
| C  | -4.126003 | 0.373228  | 1.909548  |
| H  | -4.254085 | 1.428114  | 1.663801  |
| H  | -4.413654 | 0.246600  | 2.957813  |
| H  | -4.818979 | -0.214390 | 1.311429  |
| C  | -1.842404 | 0.735311  | 2.774613  |
| H  | -0.778169 | 0.533690  | 2.688713  |

|   |           |           |           |
|---|-----------|-----------|-----------|
| H | -2.164153 | 0.451820  | 3.781722  |
| H | -2.014095 | 1.804987  | 2.654140  |
| C | -2.545895 | -1.572326 | 2.073082  |
| H | -3.091049 | -2.190307 | 1.360656  |
| H | -2.967462 | -1.764755 | 3.064640  |
| H | -1.502715 | -1.882482 | 2.085362  |
| C | -3.263070 | -0.067680 | -1.313792 |
| C | -4.334890 | 1.033025  | -1.320617 |
| H | -4.899395 | 1.092377  | -0.395146 |
| H | -5.042532 | 0.819459  | -2.126661 |
| H | -3.893655 | 2.010125  | -1.520315 |
| C | -3.901238 | -1.447397 | -1.119396 |
| H | -3.150383 | -2.238158 | -1.087665 |
| H | -4.556922 | -1.652828 | -1.970430 |
| H | -4.506911 | -1.513440 | -0.218617 |
| C | -2.586375 | -0.049347 | -2.687125 |
| H | -2.014275 | 0.864661  | -2.847483 |
| H | -3.361109 | -0.093141 | -3.457392 |
| H | -1.939882 | -0.913861 | -2.829204 |
| C | -0.196131 | -2.357201 | -0.531629 |
| C | 0.341707  | -0.238965 | -2.128386 |
| N | 2.022942  | -2.395630 | 2.354877  |
| N | 1.724630  | -1.192905 | 2.354298  |
| O | 0.544331  | -0.855749 | 1.804908  |

57

ts-1-2d (SMD-BS2) el energy= -  
1698.10247896

|    |           |           |           |
|----|-----------|-----------|-----------|
| Ru | 0.296029  | -0.555965 | -0.358006 |
| H  | 0.223710  | -1.738642 | 1.037091  |
| P  | -1.900815 | 0.321524  | 0.017777  |
| O  | -0.585793 | -3.379049 | -0.979017 |
| O  | 0.686911  | 0.091023  | -3.296649 |
| N  | 2.440670  | -0.637029 | -0.360044 |
| N  | 0.848490  | 1.421211  | 0.086331  |
| C  | 3.171981  | -1.740950 | -0.564084 |
| H  | 2.623429  | -2.645591 | -0.782031 |
| C  | 4.552327  | -1.734380 | -0.492170 |
| H  | 5.102261  | -2.650176 | -0.658471 |
| C  | 5.197154  | -0.537301 | -0.201094 |
| H  | 6.276234  | -0.495473 | -0.130706 |
| C  | 4.442691  | 0.604744  | 0.003789  |
| H  | 4.926733  | 1.540975  | 0.238546  |
| C  | 3.052624  | 0.542499  | -0.081966 |
| C  | 2.169262  | 1.706007  | 0.117822  |

|   |           |           |           |
|---|-----------|-----------|-----------|
| C | 2.631324  | 2.994673  | 0.296573  |
| H | 3.685951  | 3.219588  | 0.313275  |
| C | 1.672428  | 4.018206  | 0.451095  |
| H | 2.003741  | 5.038066  | 0.606300  |
| C | 0.336599  | 3.737936  | 0.403273  |
| H | -0.399912 | 4.522665  | 0.516486  |
| C | -0.125927 | 2.395548  | 0.191558  |
| C | -1.463172 | 2.043954  | 0.091775  |
| H | -2.218782 | 2.803636  | 0.235849  |
| C | -2.680680 | -0.141869 | 1.713894  |
| C | -4.084820 | 0.446670  | 1.896720  |
| H | -4.098856 | 1.523737  | 1.723691  |
| H | -4.395257 | 0.278626  | 2.932501  |
| H | -4.829678 | -0.020727 | 1.256126  |
| C | -1.782135 | 0.479464  | 2.790053  |
| H | -0.737365 | 0.209344  | 2.666394  |
| H | -2.110380 | 0.123305  | 3.770891  |
| H | -1.847923 | 1.567372  | 2.781726  |
| C | -2.721292 | -1.661877 | 1.903891  |
| H | -3.330238 | -2.163808 | 1.154660  |
| H | -3.154506 | -1.884558 | 2.883747  |
| H | -1.722951 | -2.094527 | 1.881307  |
| C | -3.225360 | 0.115020  | -1.351185 |
| C | -4.230482 | 1.275754  | -1.315851 |
| H | -4.797222 | 1.327677  | -0.390748 |
| H | -4.944602 | 1.141214  | -2.133473 |
| H | -3.730673 | 2.232661  | -1.468738 |
| C | -3.951921 | -1.229192 | -1.236807 |
| H | -3.253497 | -2.066661 | -1.210024 |
| H | -4.586995 | -1.359885 | -2.117741 |
| H | -4.593918 | -1.289094 | -0.360976 |
| C | -2.526686 | 0.160350  | -2.712203 |
| H | -1.913301 | 1.054699  | -2.823679 |
| H | -3.289627 | 0.182126  | -3.495166 |
| H | -1.913484 | -0.724044 | -2.878984 |
| C | -0.245621 | -2.306933 | -0.739972 |
| C | 0.417849  | -0.068118 | -2.195471 |
| N | 1.373401  | -0.426348 | 2.182089  |
| N | 1.336226  | -1.491740 | 2.662835  |
| O | 0.759591  | -2.544072 | 2.290848  |

60

ts-3-4-oh2 (SMD-BS2) el energy= -  
1774.63328964

|    |          |           |           |
|----|----------|-----------|-----------|
| Ru | 0.185356 | -0.427683 | -0.516319 |
|----|----------|-----------|-----------|

|   |           |           |           |
|---|-----------|-----------|-----------|
| P | -2.014185 | 0.286244  | 0.107176  |
| O | -0.650888 | -3.192772 | -1.457829 |
| O | 0.283903  | 0.593315  | -3.338310 |
| N | 2.336220  | -0.401096 | -0.695757 |
| N | 0.683016  | 1.502203  | 0.101776  |
| C | 3.097597  | -1.435496 | -1.071322 |
| H | 2.574786  | -2.328624 | -1.381398 |
| C | 4.479844  | -1.377437 | -1.055037 |
| H | 5.057409  | -2.238323 | -1.361324 |
| C | 5.089216  | -0.201716 | -0.633319 |
| H | 6.167842  | -0.121278 | -0.599726 |
| C | 4.301048  | 0.871217  | -0.250164 |
| H | 4.759055  | 1.789211  | 0.086286  |
| C | 2.912272  | 0.758690  | -0.292800 |
| C | 1.993033  | 1.844239  | 0.102025  |
| C | 2.413242  | 3.115811  | 0.425552  |
| H | 3.457523  | 3.385483  | 0.419812  |
| C | 1.423466  | 4.070837  | 0.754136  |
| H | 1.724362  | 5.076867  | 1.020707  |
| C | 0.100891  | 3.740502  | 0.734528  |
| H | -0.658056 | 4.471473  | 0.980566  |
| C | -0.322481 | 2.411865  | 0.383707  |
| C | -1.646517 | 2.015837  | 0.324629  |
| H | -2.419492 | 2.718682  | 0.602433  |
| C | -2.611139 | -0.401731 | 1.799940  |
| C | -4.052337 | -0.003641 | 2.137408  |
| H | -4.193961 | 1.077628  | 2.103973  |
| H | -4.261242 | -0.327197 | 3.161787  |
| H | -4.792409 | -0.473396 | 1.492974  |
| C | -1.707938 | 0.210337  | 2.880608  |
| H | -0.658404 | 0.010013  | 2.687664  |
| H | -1.970188 | -0.242004 | 3.842145  |
| H | -1.858958 | 1.286748  | 2.961096  |
| C | -2.467083 | -1.928554 | 1.816628  |
| H | -3.075480 | -2.414290 | 1.054979  |
| H | -2.797315 | -2.305543 | 2.789767  |
| H | -1.428771 | -2.220658 | 1.677399  |
| C | -3.433480 | 0.153063  | -1.167687 |
| C | -4.511138 | 1.214315  | -0.899034 |
| H | -5.004095 | 1.094937  | 0.061079  |
| H | -5.276848 | 1.133460  | -1.675966 |
| H | -4.095002 | 2.220936  | -0.951607 |
| C | -4.047340 | -1.250921 | -1.177671 |
| H | -3.291002 | -2.021148 | -1.333545 |
| H | -4.758343 | -1.317060 | -2.006307 |



|   |           |           |           |
|---|-----------|-----------|-----------|
| H | -4.589295 | -1.482637 | -0.263574 |
| C | -2.861119 | 0.429598  | -2.560258 |
| H | -2.305410 | 1.366989  | -2.593729 |
| H | -3.690135 | 0.508638  | -3.268744 |
| H | -2.221709 | -0.383364 | -2.899870 |
| C | -0.317005 | -2.166988 | -1.068434 |
| C | 0.113057  | 0.210836  | -2.269471 |
| N | 2.125237  | -2.876357 | 1.999789  |
| H | 2.555709  | -1.922515 | 2.468225  |
| N | 1.157290  | -2.687054 | 1.364073  |
| O | 0.648085  | -1.088934 | 1.402504  |
| H | 1.587582  | -0.582050 | 2.049117  |
| O | 2.530611  | -0.519556 | 2.743548  |
| H | 3.236409  | -0.020844 | 2.313918  |

60

ts-3-4-oh2-b (SMD-BS2) el energy= -  
1774.62989077

|    |           |           |           |
|----|-----------|-----------|-----------|
| Ru | 0.195952  | -0.398831 | -0.535134 |
| H  | 2.457431  | -2.368963 | 2.256201  |
| P  | -2.013973 | 0.268282  | 0.106079  |
| O  | -0.578882 | -3.157052 | -1.536147 |
| O  | 0.266443  | 0.786608  | -3.291218 |
| N  | 2.344200  | -0.337805 | -0.703865 |
| N  | 0.666091  | 1.515454  | 0.151364  |
| C  | 3.119354  | -1.354466 | -1.100739 |
| H  | 2.608730  | -2.233634 | -1.467002 |
| C  | 4.499711  | -1.292088 | -1.048006 |
| H  | 5.089562  | -2.137729 | -1.373062 |
| C  | 5.093096  | -0.129016 | -0.569369 |
| H  | 6.170195  | -0.046982 | -0.504906 |
| C  | 4.291529  | 0.926268  | -0.170057 |
| H  | 4.735782  | 1.832066  | 0.214407  |
| C  | 2.904895  | 0.808701  | -0.246853 |
| C  | 1.971101  | 1.874857  | 0.162737  |
| C  | 2.372259  | 3.146309  | 0.507695  |
| H  | 3.413138  | 3.428910  | 0.510951  |
| C  | 1.368407  | 4.082447  | 0.847201  |
| H  | 1.654701  | 5.087396  | 1.133289  |
| C  | 0.050130  | 3.735651  | 0.812370  |
| H  | -0.720172 | 4.452597  | 1.064305  |
| C  | -0.352743 | 2.408967  | 0.432586  |
| C  | -1.672362 | 1.999810  | 0.344894  |
| H  | -2.456834 | 2.687627  | 0.628079  |
| C  | -2.592077 | -0.444014 | 1.794794  |

|   |           |           |           |
|---|-----------|-----------|-----------|
| C | -4.028539 | -0.042865 | 2.148514  |
| H | -4.168534 | 1.038716  | 2.116791  |
| H | -4.227350 | -0.366536 | 3.174865  |
| H | -4.775717 | -0.511280 | 1.511170  |
| C | -1.674776 | 0.156269  | 2.870095  |
| H | -0.627647 | -0.027541 | 2.654471  |
| H | -1.914498 | -0.316676 | 3.827527  |
| H | -1.835635 | 1.229159  | 2.973751  |
| C | -2.454714 | -1.971546 | 1.798634  |
| H | -3.070365 | -2.449942 | 1.038666  |
| H | -2.779147 | -2.353381 | 2.771853  |
| H | -1.418088 | -2.267118 | 1.651916  |
| C | -3.433835 | 0.118778  | -1.165372 |
| C | -4.522606 | 1.167906  | -0.894530 |
| H | -5.010449 | 1.043659  | 0.067761  |
| H | -5.290184 | 1.077540  | -1.668579 |
| H | -4.117867 | 2.179038  | -0.949210 |
| C | -4.032495 | -1.291807 | -1.170871 |
| H | -3.267845 | -2.055465 | -1.319121 |
| H | -4.739108 | -1.369202 | -2.002224 |
| H | -4.576354 | -1.523629 | -0.257954 |
| C | -2.869695 | 0.398506  | -2.560468 |
| H | -2.350262 | 1.355699  | -2.604346 |
| H | -3.700564 | 0.439048  | -3.270119 |
| H | -2.199953 | -0.394514 | -2.890298 |
| C | -0.278424 | -2.120201 | -1.148512 |
| C | 0.110807  | 0.333907  | -2.248423 |
| N | 2.621029  | -1.315740 | 2.629174  |
| N | 1.828051  | -0.540265 | 2.238633  |
| O | 0.627477  | -1.262148 | 1.331660  |
| O | 1.695149  | -3.383637 | 1.506952  |
| H | 2.137529  | -3.696022 | 0.708494  |
| H | 1.055987  | -2.404476 | 1.281988  |

59

complex-1-no-hydride (C1) el energy=  
-1850.34521289

|    |           |           |           |
|----|-----------|-----------|-----------|
| Ru | 0.086042  | 0.073782  | -0.038017 |
| P  | 2.247737  | 1.051571  | 0.098962  |
| O  | 0.985156  | -2.810986 | -0.649959 |
| O  | -0.129060 | -0.536148 | 2.881574  |
| N  | -2.034762 | -0.014526 | -0.509566 |
| N  | -0.494263 | 2.043327  | 0.130513  |
| C  | -2.738326 | -1.120296 | -0.824955 |
| H  | -2.169660 | -2.039458 | -0.918707 |

|   |           |           |           |
|---|-----------|-----------|-----------|
| C | -4.110234 | -1.100892 | -1.019583 |
| H | -4.643451 | -2.011928 | -1.269962 |
| C | -4.779014 | 0.118944  | -0.873735 |
| C | -6.272142 | 0.195229  | -1.124550 |
| C | -4.063566 | 1.259528  | -0.537036 |
| H | -4.582115 | 2.201653  | -0.408015 |
| C | -2.677421 | 1.177538  | -0.359477 |
| C | -1.830924 | 2.329456  | -0.010628 |
| C | -2.316979 | 3.603489  | 0.151403  |
| H | -3.367381 | 3.835440  | 0.028569  |
| C | -1.399457 | 4.641014  | 0.492174  |
| C | -1.951095 | 6.033196  | 0.687807  |
| C | -0.070341 | 4.377781  | 0.631593  |
| H | 0.629105  | 5.165888  | 0.888474  |
| C | 0.435272  | 3.041279  | 0.431814  |
| C | 1.775083  | 2.720099  | 0.517737  |
| H | 2.503861  | 3.470066  | 0.805405  |
| C | 2.742799  | 1.058708  | -1.749614 |
| C | 3.645383  | 2.258107  | -2.080809 |
| H | 3.168928  | 3.204534  | -1.805051 |
| H | 3.833271  | 2.274025  | -3.162766 |
| H | 4.615987  | 2.200433  | -1.580738 |
| C | 1.408521  | 1.224716  | -2.513514 |
| H | 0.736994  | 0.352599  | -2.382033 |
| H | 1.601706  | 1.279199  | -3.593330 |
| H | 0.875730  | 2.135791  | -2.224260 |
| C | 3.417961  | -0.254834 | -2.170234 |
| H | 4.398417  | -0.383822 | -1.702497 |
| H | 3.577016  | -0.239689 | -3.256468 |
| H | 2.809444  | -1.136000 | -1.941066 |
| C | 3.603619  | 0.462903  | 1.272155  |
| C | 4.959907  | 1.094495  | 0.906168  |
| H | 5.344990  | 0.732368  | -0.051575 |
| H | 5.692563  | 0.823954  | 1.677208  |
| H | 4.910480  | 2.189204  | 0.871548  |
| C | 3.692560  | -1.073322 | 1.232308  |
| H | 2.761294  | -1.538378 | 1.574342  |
| H | 4.491256  | -1.401021 | 1.909486  |
| H | 3.926474  | -1.460753 | 0.236559  |
| C | 3.202760  | 0.914213  | 2.690751  |
| H | 3.165595  | 2.003987  | 2.781101  |
| H | 3.952184  | 0.539641  | 3.399612  |
| H | 2.232709  | 0.513153  | 2.999713  |
| C | 0.651547  | -1.741775 | -0.417683 |
| C | -0.010524 | -0.316940 | 1.762520  |

|   |           |           |           |
|---|-----------|-----------|-----------|
| F | -0.993451 | 6.920253  | 0.988994  |
| F | -2.574989 | 6.450182  | -0.429912 |
| F | -2.860311 | 6.041834  | 1.679578  |
| F | -6.808609 | 1.280696  | -0.548238 |
| F | -6.515523 | 0.259808  | -2.443098 |
| F | -6.889503 | -0.893169 | -0.643278 |

60

|    | complex-1 (C1) | el energy= -  |           |
|----|----------------|---------------|-----------|
|    |                | 1851.14432611 |           |
| Ru | 0.027487       | 0.008737      | 0.016886  |
| H  | 0.045975       | 0.142455      | -1.619941 |
| P  | 2.179625       | 1.011815      | -0.067809 |
| O  | 0.995797       | -2.837837     | -0.472554 |
| O  | -0.466019      | -0.214043     | 3.101803  |
| N  | -2.123163      | -0.083389     | -0.244512 |
| N  | -0.573971      | 2.033789      | 0.094879  |
| C  | -2.837403      | -1.201046     | -0.454343 |
| H  | -2.272557      | -2.127146     | -0.461435 |
| C  | -4.210300      | -1.189028     | -0.657483 |
| H  | -4.749116      | -2.114039     | -0.832975 |
| C  | -4.865258      | 0.045066      | -0.640243 |
| C  | -6.364040      | 0.105858      | -0.805007 |
| C  | -4.132592      | 1.204908      | -0.429278 |
| H  | -4.628739      | 2.167438      | -0.431910 |
| C  | -2.748533      | 1.123396      | -0.229470 |
| C  | -1.893674      | 2.307162      | -0.007525 |
| C  | -2.395769      | 3.593593      | 0.093628  |
| H  | -3.453133      | 3.813075      | 0.024711  |
| C  | -1.458539      | 4.636232      | 0.313948  |
| C  | -1.983223      | 6.041379      | 0.424763  |
| C  | -0.119287      | 4.374458      | 0.412662  |
| H  | 0.590847       | 5.177681      | 0.576384  |
| C  | 0.374455       | 3.025331      | 0.291857  |
| C  | 1.718424       | 2.687910      | 0.353162  |
| H  | 2.458697       | 3.476918      | 0.446628  |
| C  | 2.923903       | 1.071199      | -1.845251 |
| C  | 4.327566       | 1.699875      | -1.883148 |
| H  | 4.345000       | 2.686136      | -1.404031 |
| H  | 4.624760       | 1.841268      | -2.931713 |
| H  | 5.089051       | 1.069327      | -1.414742 |
| C  | 1.993596       | 1.967170      | -2.686022 |
| H  | 0.959254       | 1.611703      | -2.665222 |
| H  | 2.339476       | 1.955703      | -3.729033 |
| H  | 2.006140       | 3.001839      | -2.328664 |

|   |           |           |           |
|---|-----------|-----------|-----------|
| C | 2.958381  | -0.334226 | -2.469235 |
| H | 3.585120  | -1.033103 | -1.907157 |
| H | 3.368137  | -0.268461 | -3.487100 |
| H | 1.951868  | -0.756622 | -2.539350 |
| C | 3.529193  | 0.472126  | 1.177849  |
| C | 4.544782  | 1.601889  | 1.438605  |
| H | 5.110817  | 1.888957  | 0.550782  |
| H | 5.266373  | 1.262894  | 2.194971  |
| H | 4.045406  | 2.493179  | 1.833993  |
| C | 4.243405  | -0.804839 | 0.705189  |
| H | 3.529977  | -1.602591 | 0.466103  |
| H | 4.894363  | -1.173999 | 1.510053  |
| H | 4.874356  | -0.634564 | -0.172029 |
| C | 2.831460  | 0.168645  | 2.514164  |
| H | 2.193578  | 0.999750  | 2.834303  |
| H | 3.593981  | 0.009353  | 3.288902  |
| H | 2.224810  | -0.739016 | 2.453437  |
| C | 0.614761  | -1.768168 | -0.262699 |
| C | -0.194105 | -0.120023 | 1.991714  |
| F | -1.015532 | 6.943515  | 0.668038  |
| F | -2.611335 | 6.418823  | -0.711001 |
| F | -2.893215 | 6.145475  | 1.418696  |
| F | -6.772189 | 1.316559  | -1.224012 |
| F | -6.794553 | -0.808501 | -1.693967 |
| F | -6.986516 | -0.148728 | 0.362502  |

63

ts-1-2 (C1) el energy= -

2035.78105752

|    |           |           |           |
|----|-----------|-----------|-----------|
| Ru | -0.784237 | -0.969920 | -0.425666 |
| H  | -0.562120 | -1.073923 | 1.348378  |
| P  | -2.845339 | 0.171466  | -0.042899 |
| O  | -2.069515 | -3.739485 | -0.678930 |
| O  | -0.495321 | -0.566264 | -3.452633 |
| N  | 1.357881  | -1.296709 | -0.358135 |
| N  | -0.009837 | 0.961822  | -0.135796 |
| C  | 1.970659  | -2.489370 | -0.441911 |
| H  | 1.323219  | -3.344569 | -0.591155 |
| C  | 3.345211  | -2.631033 | -0.311640 |
| H  | 3.803307  | -3.612406 | -0.370927 |
| C  | 4.106547  | -1.482579 | -0.082926 |
| C  | 5.609620  | -1.582093 | 0.019537  |
| C  | 3.477228  | -0.248328 | 0.006969  |
| H  | 4.057952  | 0.644086  | 0.204248  |
| C  | 2.087265  | -0.170779 | -0.138055 |

|   |           |           |           |
|---|-----------|-----------|-----------|
| C | 1.335768  | 1.098087  | -0.058955 |
| C | 1.946317  | 2.332441  | 0.063267  |
| H | 3.021363  | 2.446095  | 0.111316  |
| C | 1.101251  | 3.473101  | 0.099605  |
| C | 1.749085  | 4.823760  | 0.241086  |
| C | -0.258179 | 3.349473  | 0.016719  |
| H | -0.896392 | 4.225872  | 0.043849  |
| C | -0.869852 | 2.049729  | -0.102975 |
| C | -2.240549 | 1.848195  | -0.175957 |
| H | -2.906069 | 2.701753  | -0.089246 |
| C | -3.506599 | -0.055933 | 1.754701  |
| C | -4.882715 | 0.594733  | 1.980717  |
| H | -4.881715 | 1.655539  | 1.703755  |
| H | -5.123713 | 0.538598  | 3.051401  |
| H | -5.690467 | 0.091657  | 1.441913  |
| C | -2.512150 | 0.660034  | 2.689953  |
| H | -1.483238 | 0.322446  | 2.559464  |
| H | -2.798725 | 0.453505  | 3.730264  |
| H | -2.535950 | 1.743360  | 2.534971  |
| C | -3.570942 | -1.551098 | 2.111524  |
| H | -4.261251 | -2.106224 | 1.468502  |
| H | -3.921879 | -1.661887 | 3.146828  |
| H | -2.589008 | -2.025866 | 2.040826  |
| C | -4.281325 | -0.024501 | -1.290376 |
| C | -5.215612 | 1.201640  | -1.265439 |
| H | -5.720624 | 1.342482  | -0.308663 |
| H | -5.991724 | 1.069910  | -2.031933 |
| H | -4.666026 | 2.118342  | -1.506355 |
| C | -5.068688 | -1.319943 | -1.030668 |
| H | -4.410569 | -2.196116 | -1.005951 |
| H | -5.789821 | -1.471873 | -1.845726 |
| H | -5.635189 | -1.290951 | -0.095811 |
| C | -3.673504 | -0.104149 | -2.700651 |
| H | -2.985744 | 0.726499  | -2.892828 |
| H | -4.482304 | -0.050152 | -3.441903 |
| H | -3.145684 | -1.048501 | -2.859524 |
| C | -1.541794 | -2.727142 | -0.538508 |
| C | -0.709334 | -0.713783 | -2.334473 |
| N | 0.117014  | -1.462860 | 2.466488  |
| N | 0.237574  | -2.640993 | 2.407192  |
| O | -0.032183 | -3.567306 | 1.650091  |
| F | 0.862544  | 5.834235  | 0.200194  |
| F | 2.421330  | 4.921308  | 1.408441  |
| F | 2.651724  | 5.034990  | -0.742015 |
| F | 5.982129  | -2.707692 | 0.654086  |

|   |          |           |           |
|---|----------|-----------|-----------|
| F | 6.170881 | -1.607899 | -1.205181 |
| F | 6.134895 | -0.536837 | 0.682135  |

63

ts-3-4 (C1)            el energy= -  
2035.76946893

|    |           |           |           |
|----|-----------|-----------|-----------|
| Ru | -0.804584 | -1.012569 | -0.435850 |
| H  | 0.665354  | -1.136192 | 2.447335  |
| P  | -2.870045 | 0.127898  | -0.027914 |
| O  | -2.056081 | -3.800687 | -0.647127 |
| O  | -0.572717 | -0.525568 | -3.441796 |
| N  | 1.367112  | -1.322399 | -0.494250 |
| N  | -0.028129 | 0.920156  | -0.169257 |
| C  | 1.986810  | -2.504560 | -0.608713 |
| H  | 1.350242  | -3.355012 | -0.828713 |
| C  | 3.357423  | -2.650511 | -0.436815 |
| H  | 3.823682  | -3.626055 | -0.521660 |
| C  | 4.101320  | -1.510747 | -0.126318 |
| C  | 5.600252  | -1.606049 | 0.031706  |
| C  | 3.461997  | -0.283419 | -0.004086 |
| H  | 4.029524  | 0.600016  | 0.261259  |
| C  | 2.078142  | -0.205128 | -0.200659 |
| C  | 1.316692  | 1.058227  | -0.095174 |
| C  | 1.924949  | 2.292285  | 0.036244  |
| H  | 3.000224  | 2.408763  | 0.071245  |
| C  | 1.076616  | 3.431362  | 0.084511  |
| C  | 1.721657  | 4.781884  | 0.239287  |
| C  | -0.282059 | 3.305612  | 0.003195  |
| H  | -0.922341 | 4.180132  | 0.040532  |
| C  | -0.891764 | 2.004525  | -0.124045 |
| C  | -2.261875 | 1.802151  | -0.190079 |
| H  | -2.925926 | 2.655552  | -0.090175 |
| C  | -3.517892 | -0.083445 | 1.770806  |
| C  | -4.891393 | 0.568389  | 2.004501  |
| H  | -4.894707 | 1.629108  | 1.725924  |
| H  | -5.119092 | 0.514333  | 3.078221  |
| H  | -5.706354 | 0.063913  | 1.477422  |
| C  | -2.505937 | 0.630220  | 2.689461  |
| H  | -1.500367 | 0.229606  | 2.551198  |
| H  | -2.804173 | 0.457045  | 3.733305  |
| H  | -2.495057 | 1.710393  | 2.510311  |
| C  | -3.562067 | -1.579167 | 2.132358  |
| H  | -4.222746 | -2.154853 | 1.475764  |
| H  | -3.942102 | -1.689219 | 3.158088  |
| H  | -2.554420 | -2.000383 | 2.092547  |

|   |           |           |           |
|---|-----------|-----------|-----------|
| C | -4.313087 | -0.083588 | -1.265961 |
| C | -5.245127 | 1.144857  | -1.240743 |
| H | -5.735959 | 1.297129  | -0.278564 |
| H | -6.032007 | 1.006065  | -1.994933 |
| H | -4.696984 | 2.057516  | -1.499523 |
| C | -5.100698 | -1.374141 | -0.983993 |
| H | -4.445863 | -2.253114 | -0.967865 |
| H | -5.837872 | -1.527038 | -1.784428 |
| H | -5.647219 | -1.339138 | -0.037971 |
| C | -3.728515 | -0.177105 | -2.684632 |
| H | -3.052607 | 0.656915  | -2.900644 |
| H | -4.551077 | -0.140431 | -3.411788 |
| H | -3.194872 | -1.118596 | -2.841853 |
| C | -1.568985 | -2.762569 | -0.571985 |
| C | -0.776264 | -0.703596 | -2.324540 |
| N | 1.123732  | -2.220025 | 2.825071  |
| N | 0.338026  | -2.793016 | 2.166469  |
| O | -0.437255 | -1.342523 | 1.568012  |
| F | 2.637190  | 4.997097  | -0.730923 |
| F | 0.835308  | 5.792018  | 0.190798  |
| F | 2.378371  | 4.875181  | 1.415938  |
| F | 6.083441  | -0.614404 | 0.799876  |
| F | 5.960391  | -2.776783 | 0.585567  |
| F | 6.211563  | -1.523567 | -1.166400 |

63

complex-3(C1)            el energy= -  
2035.82365549

|    |           |           |
|----|-----------|-----------|
| Ru | -0.747502 | -1.020738 |
|    | -0.400060 |           |
| H  | 0.608173  | -1.805181 |
|    | 3.541467  |           |
| P  | -2.829816 | 0.094294  |
|    | 0.034541  |           |
| O  | -1.939607 | -3.841247 |
|    | -0.593255 |           |
| O  | -0.635828 | -0.575166 |
|    | -3.404033 |           |
| N  | 1.409412  | -1.298291 |
|    | -0.496108 |           |
| N  | -0.010653 | 0.929487  |
|    | -0.193295 |           |
| C  | 2.038135  | -2.479521 |
|    | -0.565071 |           |
| H  | 1.406989  | -3.346459 |

|           |           |           |           |           |           |
|-----------|-----------|-----------|-----------|-----------|-----------|
| -0.722035 |           |           | C         | -2.359889 | 0.678477  |
| C         | 3.414760  | -2.599916 | 2.719010  |           |           |
| -0.420687 |           |           | H         | -1.353203 | 0.286019  |
| H         | 3.890272  | -3.573287 | 2.565326  |           |           |
| -0.470461 |           |           | H         | -2.621362 | 0.539388  |
| C         | 4.151570  | -1.439149 | 3.777751  |           |           |
| -0.182154 |           |           | H         | -2.364167 | 1.752272  |
| C         | 5.655546  | -1.507696 | 2.505209  |           |           |
| -0.062168 |           |           | C         | -3.443980 | -1.548411 |
| C         | 3.499823  | -0.214874 | 2.273841  |           |           |
| -0.093144 |           |           | H         | -4.155372 | -2.132910 |
| H         | 4.061338  | 0.685313  | 1.682091  |           |           |
| 0.124458  |           |           | H         | -3.754945 | -1.621276 |
| C         | 2.111709  | -0.161908 | 3.325473  |           |           |
| -0.257474 |           |           | H         | -2.454023 | -1.999338 |
| C         | 1.334152  | 1.092428  | 2.183573  |           |           |
| -0.171168 |           |           | C         | -4.309732 | -0.188498 |
| C         | 1.922627  | 2.340359  | -1.143019 |           |           |
| -0.104509 |           |           | C         | -5.258602 | 1.027155  |
| H         | 2.996248  | 2.476003  | -1.135914 |           |           |
| -0.109472 |           |           | H         | -5.717926 | 1.212242  |
| C         | 1.055620  | 3.465682  | -0.163776 |           |           |
| -0.066387 |           |           | H         | -6.068955 | 0.846072  |
| C         | 1.680475  | 4.831719  | -1.855415 |           |           |
| 0.024205  |           |           | H         | -4.733878 | 1.935795  |
| C         | -0.302430 | 3.314545  | -1.451003 |           |           |
| -0.102228 |           |           | C         | -5.069056 | -1.476351 |
| H         | -0.956971 | 4.178826  | -0.782361 |           |           |
| -0.076596 |           |           | H         | -4.400858 | -2.344561 |
| C         | -0.891584 | 2.000015  | -0.742754 |           |           |
| -0.169788 |           |           | H         | -5.823338 | -1.676264 |
| C         | -2.259567 | 1.771824  | -1.555910 |           |           |
| -0.202722 |           |           | H         | -5.593278 | -1.404654 |
| H         | -2.937209 | 2.615931  | 0.174230  |           |           |
| -0.117543 |           |           | C         | -3.770123 | -0.333092 |
| C         | -3.404981 | -0.065971 | -2.575159 |           |           |
| 1.862322  |           |           | H         | -3.123605 | 0.506267  |
| C         | -4.769161 | 0.595259  | -2.851533 |           |           |
| 2.123591  |           |           | H         | -4.616813 | -0.348813 |
| H         | -4.782948 | 1.644357  | -3.274729 |           |           |
| 1.804494  |           |           | H         | -3.218976 | -1.268500 |
| H         | -4.956953 | 0.582587  | -2.708650 |           |           |
| 3.206250  |           |           | C         | -1.471910 | -2.796286 |
| H         | -5.602436 | 0.071331  | -0.515129 |           |           |
| 1.646301  |           |           | C         | -0.792776 | -0.733088 |

|           |           |           |
|-----------|-----------|-----------|
| -2.277197 |           |           |
| N         | 0.655468  | -2.708732 |
| 3.021805  |           |           |
| N         | 0.165228  | -2.542281 |
| 1.893736  |           |           |
| O         | -0.290858 | -1.296467 |
| 1.642092  |           |           |
| F         | 2.567102  | 5.027228  |
| -0.976328 |           |           |
| F         | 0.775125  | 5.824156  |
| -0.037071 |           |           |
| F         | 2.364334  | 4.977675  |
| 1.179510  |           |           |
| F         | 6.142712  | -0.488133 |
| 0.666622  |           |           |
| F         | 6.050241  | -2.656978 |
| 0.511739  |           |           |
| F         | 6.233123  | -1.446195 |
| -1.278273 |           |           |

56

complex-1-no-hydride (C2) el energy= -  
1513.31951889

|    |           |           |           |
|----|-----------|-----------|-----------|
| Ru | -0.855823 | 1.029494  | 0.106337  |
| P  | -1.853053 | -1.123119 | -0.044331 |
| O  | -3.441985 | 2.690087  | -0.129545 |
| O  | -0.947392 | 1.172862  | 3.091105  |
| N  | 0.668186  | 2.543689  | -0.206483 |
| N  | 0.873050  | -0.087528 | 0.016930  |
| C  | 0.462989  | 3.871188  | -0.313526 |
| H  | -0.572485 | 4.195745  | -0.309811 |
| C  | 1.506160  | 4.779730  | -0.422691 |
| H  | 1.293415  | 5.840284  | -0.512112 |
| C  | 2.816269  | 4.291882  | -0.411307 |
| H  | 3.660585  | 4.971205  | -0.490443 |
| C  | 3.031921  | 2.923052  | -0.295058 |
| H  | 4.042410  | 2.530762  | -0.281002 |
| C  | 1.940103  | 2.053152  | -0.194560 |
| C  | 2.065303  | 0.590000  | -0.076839 |
| C  | 3.269343  | -0.069951 | -0.073623 |
| H  | 4.210917  | 0.457328  | -0.159218 |
| C  | 3.264066  | -1.490894 | 0.048026  |
| C  | 4.596480  | -2.200376 | 0.070980  |
| C  | 2.092352  | -2.179691 | 0.136990  |
| H  | 2.086739  | -3.260432 | 0.227272  |

|   |           |           |           |
|---|-----------|-----------|-----------|
| C | 0.830935  | -1.480639 | 0.105540  |
| C | -0.390271 | -2.123996 | 0.150694  |
| H | -0.440833 | -3.200539 | 0.272576  |
| C | -2.317030 | -1.166317 | -1.900834 |
| C | -2.237208 | -2.594730 | -2.463205 |
| H | -1.247980 | -3.033797 | -2.297501 |
| H | -2.418382 | -2.562139 | -3.545971 |
| H | -2.988008 | -3.258034 | -2.025288 |
| C | -1.234871 | -0.306941 | -2.594948 |
| H | -1.286860 | 0.758379  | -2.293691 |
| H | -1.397867 | -0.308091 | -3.681119 |
| H | -0.224396 | -0.684124 | -2.409378 |
| C | -3.703368 | -0.560989 | -2.164782 |
| H | -4.508082 | -1.173359 | -1.747333 |
| H | -3.866577 | -0.507561 | -3.249244 |
| H | -3.803903 | 0.454955  | -1.768391 |
| C | -3.207034 | -1.746113 | 1.113894  |
| C | -3.839225 | -3.042617 | 0.574118  |
| H | -4.412097 | -2.877877 | -0.343090 |
| H | -4.533421 | -3.435517 | 1.327972  |
| H | -3.089621 | -3.819550 | 0.382965  |
| C | -4.277957 | -0.655288 | 1.295022  |
| H | -3.859711 | 0.244509  | 1.759752  |
| H | -5.063123 | -1.034372 | 1.961221  |
| H | -4.755943 | -0.367061 | 0.354369  |
| C | -2.541310 | -2.037582 | 2.473449  |
| H | -1.795839 | -2.835385 | 2.403805  |
| H | -3.317837 | -2.357592 | 3.179917  |
| H | -2.056283 | -1.154363 | 2.899897  |
| C | -2.482287 | 2.074138  | -0.036143 |
| C | -0.949107 | 1.104846  | 1.946371  |
| F | 4.463084  | -3.529515 | 0.175206  |
| F | 5.288697  | -1.934574 | -1.053306 |
| F | 5.340071  | -1.770167 | 1.107233  |

57

complex-1 (C2) el energy= -  
1514.11317050

|    |          |          |           |
|----|----------|----------|-----------|
| Ru | 1.952051 | 5.670530 | 11.245788 |
| H  | 0.897909 | 6.901852 | 11.514121 |
| P  | 0.323800 | 4.854368 | 9.720045  |
| O  | 0.708046 | 4.420623 | 13.729200 |
| O  | 4.299548 | 3.637515 | 10.851703 |
| N  | 3.422911 | 7.069110 | 12.010406 |
| N  | 2.599578 | 6.708830 | 9.521267  |

|   |           |          |           |
|---|-----------|----------|-----------|
| C | 3.763121  | 7.215718 | 13.300458 |
| H | 3.266408  | 6.547008 | 13.995879 |
| C | 4.687128  | 8.160575 | 13.730926 |
| H | 4.927825  | 8.240488 | 14.786678 |
| C | 5.281292  | 8.989276 | 12.776851 |
| H | 6.006922  | 9.743674 | 13.070081 |
| C | 4.930277  | 8.839314 | 11.440276 |
| H | 5.373735  | 9.476426 | 10.683513 |
| C | 3.993361  | 7.866462 | 11.068606 |
| C | 3.562302  | 7.645815 | 9.671341  |
| C | 4.098860  | 8.333838 | 8.595836  |
| H | 4.877975  | 9.075838 | 8.710708  |
| C | 3.595573  | 8.015081 | 7.308332  |
| C | 4.168842  | 8.749522 | 6.128350  |
| C | 2.616162  | 7.073772 | 7.143608  |
| H | 2.233305  | 6.839289 | 6.156365  |
| C | 2.069454  | 6.381332 | 8.283161  |
| C | 1.058840  | 5.434018 | 8.196939  |
| H | 0.607114  | 5.229413 | 7.230740  |
| C | -1.384516 | 5.733424 | 9.883724  |
| C | -2.437733 | 5.178981 | 8.909175  |
| H | -2.076791 | 5.185964 | 7.873662  |
| H | -3.330293 | 5.819142 | 8.948196  |
| H | -2.757668 | 4.163646 | 9.161582  |
| C | -1.155642 | 7.214344 | 9.523674  |
| H | -0.376401 | 7.666752 | 10.143987 |
| H | -2.090902 | 7.767461 | 9.688648  |
| H | -0.865580 | 7.329179 | 8.474327  |
| C | -1.905192 | 5.647840 | 11.328435 |
| H | -2.072646 | 4.618306 | 11.659222 |
| H | -2.865682 | 6.177831 | 11.399679 |
| H | -1.207163 | 6.122134 | 12.024297 |
| C | 0.059250  | 2.968001 | 9.529474  |
| C | -0.472881 | 2.606674 | 8.128792  |
| H | -1.457232 | 3.028000 | 7.917523  |
| H | -0.558115 | 1.513623 | 8.052037  |
| H | 0.220818  | 2.939965 | 7.349132  |
| C | -0.873253 | 2.423533 | 10.624050 |
| H | -0.536210 | 2.717805 | 11.625245 |
| H | -0.874927 | 1.325123 | 10.585118 |
| H | -1.908110 | 2.755645 | 10.499247 |
| C | 1.431752  | 2.291723 | 9.684080  |
| H | 2.178766  | 2.739631 | 9.019605  |
| H | 1.339627  | 1.228439 | 9.422991  |
| H | 1.795241  | 2.351296 | 10.713589 |

|                                       |           |           |           |
|---------------------------------------|-----------|-----------|-----------|
| C                                     | 1.205352  | 4.881536  | 12.793908 |
| C                                     | 3.383019  | 4.320020  | 10.953181 |
| F                                     | 3.630701  | 8.362824  | 4.957418  |
| F                                     | 3.975040  | 10.083194 | 6.240220  |
| F                                     | 5.505373  | 8.564444  | 6.038894  |
| 60                                    |           |           |           |
| ts-1-2 (C2) el energy= -1698.75033898 |           |           |           |
| Ru                                    | 0.807272  | 0.809046  | -0.432425 |
| H                                     | 0.698771  | 1.052909  | 1.336141  |
| P                                     | 1.710123  | -1.362823 | -0.023897 |
| O                                     | 3.536501  | 2.169614  | -0.722752 |
| O                                     | 0.317649  | 0.643724  | -3.455488 |
| N                                     | -0.662843 | 2.399423  | -0.382908 |
| N                                     | -1.001801 | -0.216474 | -0.126730 |
| C                                     | -0.397462 | 3.711995  | -0.484114 |
| H                                     | 0.642586  | 3.971822  | -0.640412 |
| C                                     | -1.385457 | 4.682068  | -0.364653 |
| H                                     | -1.122772 | 5.732125  | -0.447427 |
| C                                     | -2.697669 | 4.269171  | -0.126690 |
| H                                     | -3.497785 | 4.996990  | -0.018611 |
| C                                     | -2.972352 | 2.910049  | -0.023583 |
| H                                     | -3.982443 | 2.568432  | 0.171829  |
| C                                     | -1.936262 | 1.978660  | -0.157856 |
| C                                     | -2.138998 | 0.517119  | -0.063098 |
| C                                     | -3.385108 | -0.068843 | 0.063255  |
| H                                     | -4.297397 | 0.511753  | 0.101153  |
| C                                     | -3.433773 | -1.486443 | 0.119629  |
| C                                     | -4.781967 | -2.137903 | 0.262310  |
| C                                     | -2.292970 | -2.237936 | 0.051581  |
| H                                     | -2.338858 | -3.320570 | 0.094511  |
| C                                     | -1.005894 | -1.602490 | -0.074949 |
| C                                     | 0.193013  | -2.299427 | -0.137801 |
| H                                     | 0.181685  | -3.380343 | -0.034463 |
| C                                     | 2.380655  | -1.574198 | 1.772300  |
| C                                     | 3.049506  | -2.938889 | 2.013501  |
| H                                     | 2.384287  | -3.769755 | 1.750320  |
| H                                     | 3.278218  | -3.032103 | 3.084388  |
| H                                     | 3.991771  | -3.058338 | 1.471424  |
| C                                     | 1.162763  | -1.498342 | 2.714089  |
| H                                     | 0.572260  | -0.591650 | 2.576349  |
| H                                     | 1.521487  | -1.505633 | 3.752601  |
| H                                     | 0.501141  | -2.358768 | 2.572027  |
| C                                     | 3.367108  | -0.442166 | 2.107694  |
| H                                     | 4.250716  | -0.451314 | 1.461580  |

|   |           |           |           |
|---|-----------|-----------|-----------|
| H | 3.713947  | -0.558190 | 3.143929  |
| H | 2.897723  | 0.541240  | 2.022056  |
| C | 2.949323  | -2.121845 | -1.267383 |
| C | 2.914934  | -3.662453 | -1.224206 |
| H | 3.226182  | -4.076299 | -0.263838 |
| H | 3.599849  | -4.053121 | -1.989516 |
| H | 1.912175  | -4.038435 | -1.455546 |
| C | 4.374296  | -1.597623 | -1.022102 |
| H | 4.406282  | -0.502025 | -1.009854 |
| H | 5.028173  | -1.937854 | -1.837165 |
| H | 4.804365  | -1.963032 | -0.085469 |
| C | 2.516474  | -1.696874 | -2.680329 |
| H | 1.459585  | -1.918934 | -2.863655 |
| H | 3.110977  | -2.251700 | -3.418883 |
| H | 2.691514  | -0.631186 | -2.851132 |
| C | 2.493394  | 1.709882  | -0.565851 |
| C | 0.581030  | 0.636443  | -2.337767 |
| N | 0.421946  | 1.799733  | 2.450399  |
| N | 1.080270  | 2.782863  | 2.380338  |
| O | 1.881015  | 3.317633  | 1.620995  |
| F | -4.716617 | -3.481447 | 0.261128  |
| F | -5.386142 | -1.763464 | 1.411532  |
| F | -5.608855 | -1.771778 | -0.742555 |

60

ts-3-4 (C2)            el energy= -  
1698.73890469

|    |           |           |           |
|----|-----------|-----------|-----------|
| Ru | 0.801306  | 0.886327  | -0.430965 |
| H  | -0.349787 | 1.871250  | 2.418190  |
| P  | 1.840631  | -1.228564 | 0.003153  |
| O  | 3.423554  | 2.454832  | -0.646786 |
| O  | 0.349417  | 0.597180  | -3.436231 |
| N  | -0.797739 | 2.381148  | -0.517801 |
| N  | -0.943418 | -0.252173 | -0.166031 |
| C  | -0.627169 | 3.702981  | -0.652270 |
| H  | 0.384539  | 4.029325  | -0.870243 |
| C  | -1.670946 | 4.609829  | -0.504660 |
| H  | -1.485251 | 5.673637  | -0.615448 |
| C  | -2.938123 | 4.113203  | -0.195895 |
| H  | -3.779453 | 4.787382  | -0.057522 |
| C  | -3.115147 | 2.740204  | -0.059104 |
| H  | -4.088709 | 2.336093  | 0.194462  |
| C  | -2.025265 | 1.878523  | -0.231285 |
| C  | -2.125411 | 0.406293  | -0.111826 |
| C  | -3.330870 | -0.258338 | 0.014727  |

|   |           |           |           |
|---|-----------|-----------|-----------|
| H | -4.279873 | 0.261135  | 0.033548  |
| C | -3.286868 | -1.676655 | 0.080985  |
| C | -4.589672 | -2.413195 | 0.231664  |
| C | -2.100054 | -2.352509 | 0.019525  |
| H | -2.075185 | -3.435485 | 0.070664  |
| C | -0.855622 | -1.634973 | -0.105928 |
| C | 0.384968  | -2.253938 | -0.157281 |
| H | 0.439501  | -3.332651 | -0.043903 |
| C | 2.486237  | -1.411619 | 1.806025  |
| C | 3.237170  | -2.730486 | 2.055306  |
| H | 2.633353  | -3.604100 | 1.781498  |
| H | 3.449892  | -2.807297 | 3.130794  |
| H | 4.196560  | -2.788791 | 1.533034  |
| C | 1.243994  | -1.407870 | 2.719393  |
| H | 0.651408  | -0.503692 | 2.570148  |
| H | 1.582827  | -1.428684 | 3.765134  |
| H | 0.615945  | -2.287592 | 2.544206  |
| C | 3.378073  | -0.208301 | 2.161045  |
| H | 4.251583  | -0.120806 | 1.506576  |
| H | 3.748979  | -0.326861 | 3.189259  |
| H | 2.794109  | 0.714035  | 2.111078  |
| C | 3.149960  | -1.895215 | -1.222474 |
| C | 3.210534  | -3.435609 | -1.182555 |
| H | 3.524123  | -3.832376 | -0.216044 |
| H | 3.936143  | -3.779927 | -1.932472 |
| H | 2.238703  | -3.871985 | -1.438474 |
| C | 4.534330  | -1.285864 | -0.943499 |
| H | 4.500567  | -0.190138 | -0.937458 |
| H | 5.227853  | -1.589824 | -1.739966 |
| H | 4.961030  | -1.618815 | 0.006377  |
| C | 2.728198  | -1.497834 | -2.646319 |
| H | 1.696287  | -1.795105 | -2.860618 |
| H | 3.382223  | -2.007217 | -3.367196 |
| H | 2.831375  | -0.422134 | -2.813891 |
| C | 2.429190  | 1.883396  | -0.568649 |
| C | 0.611254  | 0.635174  | -2.317266 |
| N | -0.087083 | 3.024021  | 2.791156  |
| N | 0.897755  | 3.008933  | 2.149944  |
| O | 0.678297  | 1.380512  | 1.570090  |
| F | -5.452684 | -2.083950 | -0.755395 |
| F | -4.441053 | -3.749742 | 0.208454  |
| F | -5.198388 | -2.094464 | 1.395298  |

60

complex-3(C2)            el energy= -



|               |           |           |           |           |           |
|---------------|-----------|-----------|-----------|-----------|-----------|
| 1698.79305630 |           |           | H         | -2.104206 | -3.428415 |
| Ru            | 0.767868  | 0.909650  | -0.061133 |           |           |
| -0.401521     |           |           | C         | -0.883136 | -1.623447 |
| H             | 0.103482  | 2.343635  | -0.163599 |           |           |
| 3.529648      |           |           | C         | 0.360397  | -2.239560 |
| P             | 1.804872  | -1.213379 | -0.192341 |           |           |
| 0.038023      |           |           | H         | 0.414601  | -3.320217 |
| O             | 3.384611  | 2.499078  | -0.100451 |           |           |
| -0.598083     |           |           | C         | 2.374029  | -1.416017 |
| O             | 0.418210  | 0.617149  | 1.863676  |           |           |
| -3.405215     |           |           | C         | 3.095145  | -2.748955 |
| N             | -0.814656 | 2.395736  | 2.126955  |           |           |
| -0.507617     |           |           | H         | 2.491732  | -3.609143 |
| N             | -0.971211 | -0.240154 | 1.812874  |           |           |
| -0.194496     |           |           | H         | 3.259267  | -2.845075 |
| C             | -0.632021 | 3.720479  | 3.209365  |           |           |
| -0.590480     |           |           | H         | 4.075591  | -2.812910 |
| H             | 0.388340  | 4.049081  | 1.645942  |           |           |
| -0.752584     |           |           | C         | 1.094508  | -1.405773 |
| C             | -1.679274 | 4.625539  | 2.725480  |           |           |
| -0.455215     |           |           | H         | 0.506664  | -0.499555 |
| H             | -1.485681 | 5.691312  | 2.569286  |           |           |
| -0.525102     |           |           | H         | 1.391593  | -1.441481 |
| C             | -2.958457 | 4.125420  | 3.783460  |           |           |
| -0.210072     |           |           | H         | 0.469361  | -2.280169 |
| H             | -3.802473 | 4.798949  | 2.516932  |           |           |
| -0.085148     |           |           | C         | 3.274019  | -0.234886 |
| C             | -3.144435 | 2.749696  | 2.267812  |           |           |
| -0.114606     |           |           | H         | 4.188880  | -0.176705 |
| H             | -4.126630 | 2.342168  | 1.669671  |           |           |
| 0.096806      |           |           | H         | 3.575957  | -0.355250 |
| C             | -2.051745 | 1.889910  | 3.317797  |           |           |
| -0.269670     |           |           | H         | 2.733487  | 0.709292  |
| C             | -2.156249 | 0.416609  | 2.179244  |           |           |
| -0.178656     |           |           | C         | 3.165550  | -1.857441 |
| C             | -3.363374 | -0.252326 | -1.141607 |           |           |
| -0.112102     |           |           | C         | 3.221871  | -3.398399 |
| H             | -4.313370 | 0.265665  | -1.129320 |           |           |
| -0.122482     |           |           | H         | 3.489181  | -3.814293 |
| C             | -3.318812 | -1.671379 | -0.156762 |           |           |
| -0.065576     |           |           | H         | 3.981543  | -3.729569 |
| C             | -4.624919 | -2.412483 | -1.850814 |           |           |
| 0.024179      |           |           | H         | 2.262596  | -3.827595 |
| C             | -2.129309 | -2.344773 | -1.438821 |           |           |
| -0.093894     |           |           | C         | 4.537711  | -1.257937 |

|           |           |           |
|-----------|-----------|-----------|
| -0.790696 |           |           |
| H         | 4.505396  | -0.162632 |
| -0.756326 |           |           |
| H         | 5.262317  | -1.541915 |
| -1.566461 |           |           |
| H         | 4.925293  | -1.618497 |
| 0.165880  |           |           |
| C         | 2.806297  | -1.429730 |
| -2.573757 |           |           |
| H         | 1.787940  | -1.729447 |
| -2.842207 |           |           |
| H         | 3.496253  | -1.917958 |
| -3.275405 |           |           |
| H         | 2.909459  | -0.349597 |
| -2.712114 |           |           |
| C         | 2.393281  | 1.926096  |
| -0.517315 |           |           |
| C         | 0.636732  | 0.651656  |
| -2.277746 |           |           |
| N         | 0.622463  | 3.094483  |
| 3.023682  |           |           |
| N         | 0.935740  | 2.668251  |
| 1.900359  |           |           |
| O         | 0.554110  | 1.400586  |
| 1.639262  |           |           |
| F         | -5.450920 | -2.067773 |
| -0.988704 |           |           |
| F         | -4.472163 | -3.748160 |
| -0.016212 |           |           |
| F         | -5.276699 | -2.114556 |
| 1.169535  |           |           |

56

complex-1-no-hydride (C3) el energy=  
-1513.31631799

|    |           |           |           |
|----|-----------|-----------|-----------|
| Ru | -0.499286 | -0.622638 | -0.140553 |
| P  | -2.699192 | 0.252805  | 0.069757  |
| O  | -1.206348 | -3.593804 | 0.274502  |
| O  | -0.609095 | -0.931309 | -3.113186 |
| N  | 1.659717  | -0.647912 | 0.090733  |
| N  | -0.023167 | 1.380971  | -0.159980 |
| C  | 2.437989  | -1.742796 | 0.210256  |
| H  | 1.919474  | -2.693725 | 0.273062  |
| C  | 3.820723  | -1.674531 | 0.250453  |
| H  | 4.414182  | -2.577663 | 0.345617  |

|   |           |           |           |
|---|-----------|-----------|-----------|
| C | 4.420409  | -0.413487 | 0.154667  |
| C | 5.927964  | -0.288664 | 0.240745  |
| C | 3.627790  | 0.716549  | 0.019018  |
| H | 4.091490  | 1.691029  | -0.071390 |
| C | 2.233240  | 0.584873  | -0.008138 |
| C | 1.309060  | 1.719730  | -0.138971 |
| C | 1.719974  | 3.030611  | -0.221693 |
| H | 2.770533  | 3.293261  | -0.191515 |
| C | 0.735652  | 4.051396  | -0.348734 |
| H | 1.049569  | 5.088594  | -0.428054 |
| C | -0.590791 | 3.728862  | -0.365983 |
| H | -1.354398 | 4.495322  | -0.459843 |
| C | -1.018611 | 2.356285  | -0.252109 |
| C | -2.347123 | 1.973681  | -0.224205 |
| H | -3.134373 | 2.707922  | -0.356535 |
| C | -2.980614 | 0.049071  | 1.953278  |
| C | -3.889357 | 1.160822  | 2.502581  |
| H | -3.487562 | 2.153196  | 2.273445  |
| H | -3.952131 | 1.061852  | 3.594638  |
| H | -4.907754 | 1.100528  | 2.109339  |
| C | -1.577931 | 0.210076  | 2.583348  |
| H | -0.892331 | -0.610790 | 2.295463  |
| H | -1.653432 | 0.156445  | 3.677808  |
| H | -1.117242 | 1.169291  | 2.327532  |
| C | -3.548699 | -1.332878 | 2.307682  |
| H | -4.570295 | -1.466925 | 1.940035  |
| H | -3.582610 | -1.432507 | 3.400647  |
| H | -2.934792 | -2.154266 | 1.923483  |
| C | -4.159160 | -0.288963 | -0.997555 |
| C | -5.488536 | 0.232225  | -0.420294 |
| H | -5.745414 | -0.241970 | 0.531437  |
| H | -6.294007 | 0.001403  | -1.129207 |
| H | -5.479232 | 1.319248  | -0.277732 |
| C | -4.182037 | -1.824238 | -1.107001 |
| H | -3.280202 | -2.205204 | -1.598810 |
| H | -5.041796 | -2.124686 | -1.719048 |
| H | -4.280510 | -2.318981 | -0.136518 |
| C | -3.945957 | 0.318538  | -2.398360 |
| H | -3.963082 | 1.412331  | -2.379143 |
| H | -4.757464 | -0.023480 | -3.053385 |
| H | -3.003181 | 0.000696  | -2.853650 |
| C | -0.943578 | -2.491525 | 0.114325  |
| C | -0.604171 | -0.829886 | -1.970655 |
| F | 6.351895  | 0.880130  | -0.263505 |
| F | 6.326017  | -0.357621 | 1.521369  |

F 6.525829 -1.283782 -0.430482

57

complex-1 (C5) el energy= -  
1514.10829980

Ru -0.445476 -0.687782 -0.110098  
H -0.354212 -0.564188 1.525783  
P -2.637039 0.198973 0.135407  
O -1.221632 -3.586319 0.414467  
O -0.164602 -0.850913 -3.223726  
N 1.719587 -0.662281 -0.002154  
N 0.036768 1.369574 -0.210266  
C 2.507430 -1.741794 0.139063  
H 1.994831 -2.697293 0.172369  
C 3.887603 -1.657020 0.240432  
H 4.487684 -2.553920 0.355083  
C 4.471682 -0.386598 0.192607  
C 5.970309 -0.258774 0.301566  
C 3.665458 0.731486 0.047792  
H 4.108869 1.718389 0.016515  
C 2.274393 0.577547 -0.050089  
C 1.345068 1.713344 -0.198652  
C 1.766228 3.029340 -0.322409  
H 2.815874 3.296718 -0.321506  
C 0.767346 4.023267 -0.466237  
H 1.060797 5.065847 -0.569192  
C -0.560373 3.682180 -0.472477  
H -1.330632 4.441651 -0.577005  
C -0.973532 2.308804 -0.332609  
C -2.300926 1.894351 -0.307680  
H -3.088281 2.642041 -0.335210  
C -3.253632 0.202622 1.963650  
C -4.682705 0.753405 2.108584  
H -4.787289 1.738678 1.638443  
H -4.910673 0.875416 3.176902  
H -5.441244 0.084169 1.691697  
C -2.315550 1.145007 2.742630  
H -1.267826 0.846090 2.644942  
H -2.584764 1.112182 3.807756  
H -2.408813 2.177940 2.392278  
C -3.165484 -1.205114 2.576353  
H -3.794092 -1.934418 2.056580  
H -3.499997 -1.167315 3.622942  
H -2.135152 -1.572203 2.566112  
C -4.042594 -0.415587 -1.011120

C -5.136214 0.655779 -1.189229  
H -5.654905 0.902936 -0.261260  
H -5.888180 0.282322 -1.898534  
H -4.715241 1.577016 -1.606626  
C -4.648359 -1.732504 -0.498993  
H -3.875881 -2.489279 -0.317405  
H -5.333920 -2.135311 -1.257900  
H -5.223171 -1.601464 0.422482  
C -3.427753 -0.673519 -2.396731  
H -2.861674 0.194052 -2.752970  
H -4.233824 -0.872047 -3.116587  
H -2.768138 -1.545577 -2.387168  
C -0.914279 -2.495378 0.190428  
C -0.360136 -0.785345 -2.095132  
F 6.377410 1.021360 0.245890  
F 6.415868 -0.781134 1.460909  
F 6.584267 -0.928094 -0.693995

60

ts-1-2 (C3) el energy= -  
1698.74580798

Ru 0.501670 -0.419603 0.473391  
H 0.273549 -0.768502 -1.266229  
P 2.715710 0.321589 -0.023715  
O 1.342002 -3.277003 1.190273  
O 0.267537 0.508776 3.386781  
N -1.664153 -0.422933 0.395414  
N 0.038737 1.537950 -0.137577  
C -2.454613 -1.479549 0.648597  
H -1.947271 -2.388301 0.948002  
C -3.833722 -1.430209 0.504329  
H -4.438242 -2.308348 0.703882  
C -4.406928 -0.229644 0.076665  
C -5.906189 -0.114671 -0.050991  
C -3.594308 0.863579 -0.188129  
H -4.029742 1.790758 -0.538802  
C -2.208141 0.752551 -0.019509  
C -1.270407 1.862101 -0.276015  
C -1.679440 3.141740 -0.613044  
H -2.727014 3.397819 -0.713838  
C -0.674277 4.122359 -0.805405  
H -0.961825 5.137647 -1.069612  
C 0.650127 3.801912 -0.661075  
H 1.424425 4.550053 -0.807529  
C 1.055255 2.463045 -0.316291

|   |           |           |           |
|---|-----------|-----------|-----------|
| C | 2.380348  | 2.066933  | -0.166319 |
| H | 3.171431  | 2.781761  | -0.372861 |
| C | 3.340947  | -0.294590 | -1.742345 |
| C | 4.802658  | 0.092038  | -2.029198 |
| H | 4.966467  | 1.170881  | -1.922015 |
| H | 5.036183  | -0.170551 | -3.070556 |
| H | 5.519977  | -0.436575 | -1.395138 |
| C | 2.474543  | 0.406918  | -2.806883 |
| H | 1.405300  | 0.252889  | -2.656344 |
| H | 2.732636  | -0.000844 | -3.794071 |
| H | 2.662679  | 1.485185  | -2.818407 |
| C | 3.172545  | -1.819350 | -1.858942 |
| H | 3.766380  | -2.364663 | -1.118488 |
| H | 3.504193  | -2.146366 | -2.854315 |
| H | 2.128446  | -2.120435 | -1.741001 |
| C | 4.099487  | 0.100509  | 1.278320  |
| C | 5.214863  | 1.148086  | 1.090199  |
| H | 5.741596  | 1.054234  | 0.139256  |
| H | 5.956182  | 1.023890  | 1.891785  |
| H | 4.812930  | 2.164537  | 1.165693  |
| C | 4.674743  | -1.325386 | 1.246089  |
| H | 3.887015  | -2.081992 | 1.337974  |
| H | 5.359396  | -1.456854 | 2.095640  |
| H | 5.243060  | -1.532275 | 0.335025  |
| C | 3.482368  | 0.339719  | 2.666339  |
| H | 2.932537  | 1.286249  | 2.705755  |
| H | 4.287014  | 0.385134  | 3.412876  |
| H | 2.812215  | -0.474586 | 2.955456  |
| C | 0.977989  | -2.230112 | 0.880934  |
| C | 0.460242  | 0.149656  | 2.313124  |
| N | -0.458669 | -1.222803 | -2.333816 |
| N | -0.764336 | -2.342843 | -2.095078 |
| O | -0.648973 | -3.171265 | -1.198023 |
| F | -6.263285 | 0.886844  | -0.875080 |
| F | -6.446091 | -1.252874 | -0.522419 |
| F | -6.472192 | 0.129253  | 1.147902  |

60

ts-3-4 (C3) el energy= -

1698.73418730

|    |           |           |           |
|----|-----------|-----------|-----------|
| Ru | -0.513825 | -0.462883 | -0.489508 |
| H  | 0.918668  | -0.846422 | 2.381595  |
| P  | -2.730589 | 0.289727  | 0.017331  |
| O  | -1.338802 | -3.325687 | -1.202839 |
| O  | -0.319525 | 0.552463  | -3.361307 |

|   |           |           |           |
|---|-----------|-----------|-----------|
| N | 1.679372  | -0.444664 | -0.514359 |
| N | -0.036521 | 1.490587  | 0.117323  |
| C | 2.468065  | -1.490303 | -0.796727 |
| H | 1.966171  | -2.374019 | -1.176346 |
| C | 3.842284  | -1.466665 | -0.599122 |
| H | 4.447974  | -2.337791 | -0.823827 |
| C | 4.405410  | -0.299789 | -0.077536 |
| C | 5.898917  | -0.206160 | 0.120611  |
| C | 3.591251  | 0.785239  | 0.218849  |
| H | 4.019129  | 1.683085  | 0.647108  |
| C | 2.212472  | 0.698972  | -0.014565 |
| C | 1.273416  | 1.804018  | 0.266444  |
| C | 1.688700  | 3.075494  | 0.624121  |
| H | 2.737782  | 3.325892  | 0.724047  |
| C | 0.687801  | 4.060207  | 0.824826  |
| H | 0.980331  | 5.070122  | 1.103845  |
| C | -0.637149 | 3.750599  | 0.668209  |
| H | -1.407671 | 4.501204  | 0.821651  |
| C | -1.049236 | 2.418090  | 0.303612  |
| C | -2.375901 | 2.033673  | 0.144295  |
| H | -3.160713 | 2.752156  | 0.362434  |
| C | -3.364797 | -0.314251 | 1.731347  |
| C | -4.823066 | 0.083633  | 2.016539  |
| H | -4.980651 | 1.163952  | 1.911669  |
| H | -5.054252 | -0.178522 | 3.058547  |
| H | -5.547088 | -0.439823 | 1.385335  |
| C | -2.483601 | 0.376505  | 2.791245  |
| H | -1.427756 | 0.154407  | 2.628262  |
| H | -2.767005 | -0.007508 | 3.781774  |
| H | -2.630713 | 1.461535  | 2.787414  |
| C | -3.190094 | -1.839359 | 1.844260  |
| H | -3.746515 | -2.387737 | 1.077008  |
| H | -3.564727 | -2.173113 | 2.822679  |
| H | -2.130242 | -2.097050 | 1.776456  |
| C | -4.110951 | 0.072393  | -1.290548 |
| C | -5.215735 | 1.131854  | -1.103084 |
| H | -5.738614 | 1.048622  | -0.149318 |
| H | -5.961514 | 1.009867  | -1.900873 |
| H | -4.804088 | 2.143725  | -1.186550 |
| C | -4.701434 | -1.346965 | -1.250311 |
| H | -3.923486 | -2.112227 | -1.354299 |
| H | -5.399254 | -1.470115 | -2.090383 |
| H | -5.257100 | -1.549165 | -0.330917 |
| C | -3.501003 | 0.299951  | -2.683100 |
| H | -2.953697 | 1.246937  | -2.734738 |

|               |           |              |           |           |           |           |
|---------------|-----------|--------------|-----------|-----------|-----------|-----------|
| H             | -4.310074 | 0.336889     | -3.425425 | -0.175818 |           |           |
| H             | -2.830884 | -0.515316    | -2.969959 | C         | 1.276576  | 1.871548  |
| C             | -1.009985 | -2.256137    | -0.938974 | 0.013701  |           |           |
| C             | -0.507737 | 0.160223     | -2.296901 | C         | 1.671974  | 3.183656  |
| N             | 1.532457  | -1.904086    | 2.595266  | 0.205944  |           |           |
| N             | 0.840652  | -2.460745    | 1.824684  | H         | 2.717572  | 3.465016  |
| O             | -0.127447 | -1.065189    | 1.449310  | 0.235431  |           |           |
| F             | 6.417763  | -1.385559    | 0.504759  | C         | 0.654863  | 4.164162  |
| F             | 6.512308  | 0.146133     | -1.027155 | 0.332371  |           |           |
| F             | 6.223030  | 0.713005     | 1.047440  | H         | 0.932359  | 5.204920  |
|               |           |              |           | 0.484512  |           |           |
| 60            |           |              |           | C         | -0.666904 | 3.812639  |
| complex-3(C3) |           | el energy= - |           | 0.259726  |           |           |
| 1698.78854657 |           |              |           | H         | -1.449664 | 4.560390  |
| Ru            | -0.470247 | -0.494176    |           | 0.353094  |           |           |
| -0.441062     |           |              |           | C         | -1.058254 | 2.440001  |
| H             | 0.982945  | -1.437602    |           | 0.060404  |           |           |
| 3.431855      |           |              |           | C         | -2.380141 | 2.014284  |
| P             | -2.694003 | 0.260977     |           | -0.022073 |           |           |
| 0.062506      |           |              |           | H         | -3.175786 | 2.736402  |
| O             | -1.237609 | -3.426253    |           | 0.135956  |           |           |
| -0.917144     |           |              |           | C         | -3.238911 | -0.153723 |
| O             | -0.429722 | 0.252712     |           | 1.860370  |           |           |
| -3.385158     |           |              |           | C         | -4.685338 | 0.273700  |
| N             | 1.703936  | -0.441666    |           | 2.163252  |           |           |
| -0.529550     |           |              |           | H         | -4.853689 | 1.333832  |
| N             | -0.030733 | 1.516523     |           | 1.938300  |           |           |
| -0.045077     |           |              |           | H         | -4.868803 | 0.136310  |
| C             | 2.500308  | -1.506266    |           | 3.238129  |           |           |
| -0.697928     |           |              |           | H         | -5.432802 | -0.321550 |
| H             | 2.003656  | -2.437766    |           | 1.630566  |           |           |
| -0.943514     |           |              |           | C         | -2.314695 | 0.655205  |
| C             | 3.879065  | -1.437413    |           | 2.793935  |           |           |
| -0.544849     |           |              |           | H         | -1.261554 | 0.427600  |
| H             | 4.492818  | -2.321682    |           | 2.620315  |           |           |
| -0.676697     |           |              |           | H         | -2.554646 | 0.387319  |
| C             | 4.435914  | -0.207755    |           | 3.833018  |           |           |
| -0.188526     |           |              |           | H         | -2.473919 | 1.731604  |
| C             | 5.932729  | -0.066962    |           | 2.672606  |           |           |
| -0.052389     |           |              |           | C         | -3.058929 | -1.656711 |
| C             | 3.611121  | 0.893348     |           | 2.137508  |           |           |
| 0.003194      |           |              |           | H         | -3.678368 | -2.283629 |
| H             | 4.033843  | 1.841377     |           | 1.488524  |           |           |
| 0.311727      |           |              |           | H         | -3.352586 | -1.869197 |
| C             | 2.229154  | 0.759207     |           | 3.175270  |           |           |

|           |           |           |
|-----------|-----------|-----------|
| H         | -2.013784 | -1.947864 |
| 2.017286  |           |           |
| C         | -4.116832 | -0.138240 |
| -1.152307 |           |           |
| C         | -5.236024 | 0.917831  |
| -1.051350 |           |           |
| H         | -5.719881 | 0.943448  |
| -0.073712 |           |           |
| H         | -6.009077 | 0.685975  |
| -1.797052 |           |           |
| H         | -4.850035 | 1.918572  |
| -1.274366 |           |           |
| C         | -4.676201 | -1.550955 |
| -0.915602 |           |           |
| H         | -3.886385 | -2.310671 |
| -0.944489 |           |           |
| H         | -5.393783 | -1.791202 |
| -1.712452 |           |           |
| H         | -5.203679 | -1.642765 |
| 0.037499  |           |           |
| C         | -3.563226 | -0.074061 |
| -2.584938 |           |           |
| H         | -3.049976 | 0.873654  |
| -2.777646 |           |           |
| H         | -4.398360 | -0.154683 |
| -3.294075 |           |           |
| H         | -2.877623 | -0.900889 |
| -2.792351 |           |           |
| C         | -0.926681 | -2.336567 |
| -0.733120 |           |           |
| C         | -0.559072 | -0.036426 |
| -2.280672 |           |           |
| N         | 1.164198  | -2.272781 |
| 2.833000  |           |           |
| N         | 0.656140  | -2.074996 |
| 1.717274  |           |           |
| O         | 0.022787  | -0.892631 |
| 1.574533  |           |           |
| F         | 6.489778  | -1.187854 |
| 0.437604  |           |           |
| F         | 6.501099  | 0.172008  |
| -1.251468 |           |           |
| F         | 6.266057  | 0.952766  |
| 0.759417  |           |           |

56  
 complex-1-no-hydride (C5) el energy=  
 -1215.61566699

|    |           |           |           |
|----|-----------|-----------|-----------|
| Ru | -0.100898 | -0.875955 | 0.100476  |
| P  | 1.869306  | 0.449472  | -0.030767 |
| O  | 1.239457  | -3.630432 | -0.236945 |
| O  | -0.065002 | -1.134822 | 3.078774  |
| N  | -2.189336 | -1.363201 | -0.221151 |
| N  | -0.988785 | 0.977621  | 0.052957  |
| C  | -2.707410 | -2.600418 | -0.355286 |
| H  | -1.992316 | -3.416372 | -0.377178 |
| C  | -4.071135 | -2.829988 | -0.460376 |
| H  | -4.443103 | -3.843405 | -0.572681 |
| C  | -4.934848 | -1.730694 | -0.415162 |
| H  | -6.010060 | -1.868763 | -0.489886 |
| C  | -4.404876 | -0.454071 | -0.270958 |
| H  | -5.062583 | 0.406650  | -0.230319 |
| C  | -3.018239 | -0.280918 | -0.176312 |
| C  | -2.360193 | 1.027682  | -0.030545 |
| C  | -3.038268 | 2.221673  | 0.007134  |
| H  | -4.119274 | 2.251158  | -0.071781 |
| C  | -2.315665 | 3.448881  | 0.152738  |
| C  | -3.072849 | 4.747928  | 0.210019  |
| C  | -0.950452 | 3.394577  | 0.230948  |
| H  | -0.367734 | 4.305498  | 0.338128  |
| C  | -0.234793 | 2.146510  | 0.168652  |
| C  | 1.145799  | 2.056860  | 0.210173  |
| H  | 1.750976  | 2.944563  | 0.358976  |
| C  | 2.288608  | 0.290909  | -1.893105 |
| C  | 2.971239  | 1.564483  | -2.418233 |
| H  | 2.358438  | 2.451386  | -2.226727 |
| H  | 3.109695  | 1.472810  | -3.503992 |
| H  | 3.957788  | 1.723259  | -1.974527 |
| C  | 0.919639  | 0.147842  | -2.597144 |
| H  | 0.408404  | -0.797211 | -2.331086 |
| H  | 1.063933  | 0.107700  | -3.685298 |
| H  | 0.253613  | 0.988630  | -2.379280 |
| C  | 3.152042  | -0.943262 | -2.191940 |
| H  | 4.158265  | -0.856041 | -1.771356 |
| H  | 3.263681  | -1.043698 | -3.279727 |
| H  | 2.704618  | -1.871857 | -1.822119 |
| C  | 3.355954  | 0.240378  | 1.115092  |
| C  | 4.573637  | 1.025067  | 0.592465  |
| H  | 4.974002  | 0.606022  | -0.335305 |
| H  | 5.371912  | 0.978271  | 1.344374  |

|   |           |           |           |
|---|-----------|-----------|-----------|
| H | 4.341782  | 2.083623  | 0.425854  |
| C | 3.696593  | -1.253960 | 1.257695  |
| H | 2.870023  | -1.812241 | 1.710957  |
| H | 4.566702  | -1.360194 | 1.917899  |
| H | 3.948009  | -1.725924 | 0.303551  |
| C | 2.948828  | 0.803375  | 2.491239  |
| H | 2.733943  | 1.875292  | 2.448784  |
| H | 3.780212  | 0.648938  | 3.191040  |
| H | 2.072823  | 0.297364  | 2.907870  |
| C | 0.740573  | -2.608393 | -0.104641 |
| C | -0.037606 | -1.044168 | 1.935071  |
| H | -2.399404 | 5.603039  | 0.321897  |
| H | -3.665388 | 4.894915  | -0.702771 |
| H | -3.775720 | 4.752105  | 1.053664  |

57

complex-1 (C5)      el energy= -  
1216.40013388

|    |           |          |           |
|----|-----------|----------|-----------|
| Ru | 1.954120  | 5.663806 | 11.249275 |
| H  | 0.900405  | 6.895657 | 11.521613 |
| P  | 0.330133  | 4.850503 | 9.716478  |
| O  | 0.711453  | 4.403826 | 13.728267 |
| O  | 4.300539  | 3.637325 | 10.828232 |
| N  | 3.424416  | 7.065113 | 12.011411 |
| N  | 2.596690  | 6.704636 | 9.524619  |
| C  | 3.766292  | 7.211107 | 13.301185 |
| H  | 3.272085  | 6.539850 | 13.996074 |
| C  | 4.687875  | 8.157447 | 13.732476 |
| H  | 4.929835  | 8.236578 | 14.788031 |
| C  | 5.277921  | 8.989212 | 12.777833 |
| H  | 6.001721  | 9.745588 | 13.071077 |
| C  | 4.925279  | 8.840128 | 11.442142 |
| H  | 5.365192  | 9.479890 | 10.685560 |
| C  | 3.990278  | 7.864978 | 11.067917 |
| C  | 3.557953  | 7.644569 | 9.671842  |
| C  | 4.088668  | 8.332562 | 8.593163  |
| H  | 4.867068  | 9.076468 | 8.720549  |
| C  | 3.599550  | 8.033141 | 7.291449  |
| C  | 4.162613  | 8.767038 | 6.100580  |
| C  | 2.619500  | 7.081147 | 7.152300  |
| H  | 2.226968  | 6.839830 | 6.167139  |
| C  | 2.075324  | 6.379833 | 8.285381  |
| C  | 1.070156  | 5.420264 | 8.197419  |
| H  | 0.613890  | 5.220717 | 7.231999  |
| C  | -1.378668 | 5.732760 | 9.881849  |

|   |           |          |           |
|---|-----------|----------|-----------|
| C | -2.430729 | 5.181861 | 8.904104  |
| H | -2.064335 | 5.185706 | 7.870353  |
| H | -3.321302 | 5.825432 | 8.937805  |
| H | -2.755794 | 4.167954 | 9.155992  |
| C | -1.144428 | 7.212549 | 9.520949  |
| H | -0.367163 | 7.662923 | 10.145181 |
| H | -2.079253 | 7.768822 | 9.679243  |
| H | -0.846258 | 7.323804 | 8.473505  |
| C | -1.903526 | 5.650709 | 11.324891 |
| H | -2.075043 | 4.622120 | 11.656200 |
| H | -2.862372 | 6.184369 | 11.394411 |
| H | -1.204538 | 6.122507 | 12.021554 |
| C | 0.054189  | 2.963524 | 9.537296  |
| C | -0.472103 | 2.599202 | 8.135337  |
| H | -1.455119 | 3.021601 | 7.919274  |
| H | -0.558117 | 1.505960 | 8.059545  |
| H | 0.225704  | 2.932120 | 7.359214  |
| C | -0.886413 | 2.427126 | 10.628700 |
| H | -0.553818 | 2.724367 | 11.630462 |
| H | -0.892463 | 1.328387 | 10.594466 |
| H | -1.919352 | 2.762772 | 10.496965 |
| C | 1.422193  | 2.280611 | 9.701406  |
| H | 2.172862  | 2.720656 | 9.035969  |
| H | 1.325521  | 1.215649 | 9.448104  |
| H | 1.782850  | 2.346868 | 10.731591 |
| C | 1.209468  | 4.869146 | 12.794604 |
| C | 3.383404  | 4.317975 | 10.942641 |
| H | 3.697823  | 8.434408 | 5.166255  |
| H | 4.003282  | 9.850204 | 6.193515  |
| H | 5.246692  | 8.608875 | 6.016947  |

60

ts-1-2 (C5)      el energy= -  
1401.03819514

|    |           |           |           |
|----|-----------|-----------|-----------|
| Ru | 0.114947  | -0.661783 | -0.453814 |
| H  | 0.326742  | -0.891386 | 1.304917  |
| P  | -1.955379 | 0.440983  | -0.007927 |
| O  | -1.145658 | -3.414917 | -0.916769 |
| O  | 0.427387  | -0.032866 | -3.438527 |
| N  | 2.258602  | -0.972501 | -0.393351 |
| N  | 0.868287  | 1.252167  | -0.024190 |
| C  | 2.881235  | -2.150877 | -0.559313 |
| H  | 2.239065  | -2.995834 | -0.777002 |
| C  | 4.257503  | -2.290563 | -0.429921 |
| H  | 4.716390  | -3.264829 | -0.566783 |

|   |           |           |           |               |              |           |           |
|---|-----------|-----------|-----------|---------------|--------------|-----------|-----------|
| C | 5.012398  | -1.159756 | -0.110977 | O             | 0.858547     | -3.410974 | 1.459556  |
| H | 6.090867  | -1.228081 | 0.007950  | H             | 1.838125     | 5.916136  | 0.684382  |
| C | 4.367963  | 0.059923  | 0.058860  | H             | 3.167802     | 5.137780  | 1.567125  |
| H | 4.934064  | 0.947536  | 0.317321  | H             | 3.295481     | 5.380024  | -0.177407 |
| C | 2.977624  | 0.141755  | -0.089449 |               |              |           |           |
| C | 2.212765  | 1.396166  | 0.070075  | 60            |              |           |           |
| C | 2.804832  | 2.627997  | 0.280995  | ts-3-4 (C5)   | el energy= - |           |           |
| H | 3.881755  | 2.735637  | 0.344453  | 1401.02681692 |              |           |           |
| C | 1.969133  | 3.774612  | 0.396691  | Ru            | 0.092083     | -0.725996 | -0.435891 |
| C | 2.594766  | 5.126251  | 0.629821  | H             | 1.538269     | -0.988651 | 2.425238  |
| C | 0.609023  | 3.618962  | 0.293392  | P             | -1.976026    | 0.405574  | -0.002501 |
| H | -0.048829 | 4.480637  | 0.378501  | O             | -1.158491    | -3.498797 | -0.800630 |
| C | 0.006109  | 2.330485  | 0.075887  | O             | 0.360843     | -0.093642 | -3.407915 |
| C | -1.366938 | 2.122832  | -0.028829 | N             | 2.260392     | -1.033023 | -0.487505 |
| H | -2.040289 | 2.961820  | 0.120812  | N             | 0.863621     | 1.191682  | -0.072143 |
| C | -2.628698 | 0.078262  | 1.764117  | C             | 2.879926     | -2.208204 | -0.660646 |
| C | -4.009073 | 0.705088  | 2.027711  | H             | 2.241183     | -3.043461 | -0.929014 |
| H | -4.011267 | 1.782278  | 1.822733  | C             | 4.250860     | -2.362993 | -0.490451 |
| H | -4.256495 | 0.575334  | 3.090788  | H             | 4.709656     | -3.336285 | -0.634195 |
| H | -4.811371 | 0.236532  | 1.450667  | C             | 4.998372     | -1.245359 | -0.114784 |
| C | -1.643363 | 0.731544  | 2.753260  | H             | 6.070889     | -1.323979 | 0.044347  |
| H | -0.613205 | 0.404055  | 2.607306  | C             | 4.355137     | -0.025364 | 0.062400  |
| H | -1.937771 | 0.456959  | 3.775833  | H             | 4.916230     | 0.850364  | 0.368382  |
| H | -1.666557 | 1.822569  | 2.667601  | C             | 2.971581     | 0.068907  | -0.136301 |
| C | -2.687074 | -1.438059 | 2.016570  | C             | 2.208663     | 1.326925  | 0.020358  |
| H | -3.374340 | -1.949950 | 1.335486  | C             | 2.809184     | 2.556776  | 0.215066  |
| H | -3.038197 | -1.623259 | 3.041465  | H             | 3.887277     | 2.658841  | 0.267591  |
| H | -1.702960 | -1.902264 | 1.912810  | C             | 1.980687     | 3.711318  | 0.314140  |
| C | -3.385687 | 0.312070  | -1.272141 | C             | 2.616089     | 5.061333  | 0.529060  |
| C | -4.330571 | 1.526082  | -1.173292 | C             | 0.620254     | 3.564182  | 0.210145  |
| H | -4.847053 | 1.595648  | -0.214573 | H             | -0.031669    | 4.431399  | 0.283358  |
| H | -5.097376 | 1.443525  | -1.956228 | C             | 0.007771     | 2.276310  | 0.010783  |
| H | -3.784174 | 2.460669  | -1.341811 | C             | -1.366312    | 2.078761  | -0.091053 |
| C | -4.164601 | -1.003553 | -1.106291 | H             | -2.030316    | 2.926912  | 0.049449  |
| H | -3.498779 | -1.873829 | -1.133182 | C             | -2.649374    | 0.109967  | 1.776682  |
| H | -4.877767 | -1.107497 | -1.936123 | C             | -4.023913    | 0.754882  | 2.022800  |
| H | -4.739373 | -1.041138 | -0.176591 | H             | -4.020708    | 1.826324  | 1.788218  |
| C | -2.768165 | 0.331323  | -2.680309 | H             | -4.265370    | 0.656746  | 3.090631  |
| H | -2.086119 | 1.178633  | -2.809361 | H             | -4.833818    | 0.275802  | 1.464858  |
| H | -3.571893 | 0.427183  | -3.423228 | C             | -1.647809    | 0.779602  | 2.738818  |
| H | -2.229420 | -0.595471 | -2.896111 | H             | -0.642920    | 0.377563  | 2.599194  |
| C | -0.626605 | -2.410589 | -0.699232 | H             | -1.963390    | 0.568215  | 3.770803  |
| C | 0.205460  | -0.265920 | -2.335623 | H             | -1.626277    | 1.865562  | 2.600127  |
| N | 1.005827  | -1.360702 | 2.409360  | C             | -2.701419    | -1.399527 | 2.072742  |
| N | 1.124500  | -2.531345 | 2.271634  | H             | -3.355430    | -1.944281 | 1.383925  |



|   |           |           |           |
|---|-----------|-----------|-----------|
| H | -3.093060 | -1.554332 | 3.088599  |
| H | -1.694534 | -1.821683 | 2.025260  |
| C | -3.408394 | 0.242699  | -1.262262 |
| C | -4.340502 | 1.469508  | -1.197697 |
| H | -4.849353 | 1.576700  | -0.238627 |
| H | -5.113214 | 1.368577  | -1.972637 |
| H | -3.785247 | 2.391820  | -1.401321 |
| C | -4.200118 | -1.057692 | -1.045787 |
| H | -3.545113 | -1.936630 | -1.057201 |
| H | -4.926896 | -1.177115 | -1.861640 |
| H | -4.759186 | -1.062152 | -0.106340 |
| C | -2.807124 | 0.209017  | -2.676616 |
| H | -2.128863 | 1.051622  | -2.846742 |
| H | -3.620374 | 0.275757  | -3.412422 |
| H | -2.269790 | -0.724487 | -2.865869 |
| C | -0.670126 | -2.466304 | -0.665637 |
| C | 0.144701  | -0.326912 | -2.302451 |
| N | 1.981985  | -2.104345 | 2.760729  |
| N | 1.169325  | -2.619011 | 2.082662  |
| O | 0.432713  | -1.144417 | 1.561545  |
| H | 1.865438  | 5.857638  | 0.571093  |
| H | 3.187859  | 5.081825  | 1.467004  |
| H | 3.320029  | 5.298045  | -0.280561 |

60

|                            |           |           |  |
|----------------------------|-----------|-----------|--|
| complex-3(C5) el energy= - |           |           |  |
| 1401.08118955              |           |           |  |
| Ru                         | 0.134930  | -0.731457 |  |
|                            | -0.414470 |           |  |
| H                          | 1.477799  | -1.634857 |  |
|                            | 3.503538  |           |  |
| P                          | -1.941361 | 0.389197  |  |
|                            | 0.043542  |           |  |
| O                          | -1.071817 | -3.536212 |  |
|                            | -0.713341 |           |  |
| O                          | 0.264526  | -0.181353 |  |
|                            | -3.397852 |           |  |
| N                          | 2.288076  | -1.015895 |  |
|                            | -0.512943 |           |  |
| N                          | 0.879063  | 1.206956  |  |
|                            | -0.141981 |           |  |
| C                          | 2.910286  | -2.196976 |  |
|                            | -0.629080 |           |  |
| H                          | 2.271505  | -3.051496 |  |
|                            | -0.822088 |           |  |

|   |           |           |
|---|-----------|-----------|
| C | 4.287170  | -2.329900 |
|   | -0.489451 |           |
| H | 4.749700  | -3.307024 |
|   | -0.587210 |           |
| C | 5.035143  | -1.187112 |
|   | -0.202358 |           |
| H | 6.112678  | -1.248704 |
|   | -0.071794 |           |
| C | 4.386239  | 0.036252  |
|   | -0.071976 |           |
| H | 4.946800  | 0.931462  |
|   | 0.172548  |           |
| C | 2.997563  | 0.108153  |
|   | -0.234356 |           |
| C | 2.225378  | 1.363584  |
|   | -0.111068 |           |
| C | 2.813572  | 2.609167  |
|   | -0.003105 |           |
| H | 3.891314  | 2.727358  |
|   | 0.001826  |           |
| C | 1.972340  | 3.756393  |
|   | 0.071453  |           |
| C | 2.595457  | 5.123217  |
|   | 0.196806  |           |
| C | 0.611207  | 3.587281  |
|   | 0.024420  |           |
| H | -0.050232 | 4.448731  |
|   | 0.076776  |           |
| C | 0.011466  | 2.283857  |
|   | -0.091762 |           |
| C | -1.362563 | 2.063776  |
|   | -0.148330 |           |
| H | -2.035155 | 2.908519  |
|   | -0.031030 |           |
| C | -2.529573 | 0.171417  |
|   | 1.862756  |           |
| C | -3.889668 | 0.834998  |
|   | 2.138535  |           |
| H | -3.893686 | 1.892516  |
|   | 1.847763  |           |
| H | -4.082856 | 0.794007  |
|   | 3.219803  |           |
| H | -4.724925 | 0.331225  |
|   | 1.643020  |           |
| C | -1.483354 | 0.882068  |

|           |           |           |
|-----------|-----------|-----------|
| 2.746249  |           |           |
| H         | -0.479809 | 0.483574  |
| 2.587154  |           |           |
| H         | -1.752954 | 0.718254  |
| 3.799724  |           |           |
| H         | -1.474564 | 1.960690  |
| 2.558375  |           |           |
| C         | -2.581153 | -1.321665 |
| 2.231067  |           |           |
| H         | -3.293811 | -1.883488 |
| 1.619177  |           |           |
| H         | -2.896939 | -1.424159 |
| 3.279096  |           |           |
| H         | -1.594090 | -1.776827 |
| 2.130809  |           |           |
| C         | -3.421241 | 0.143444  |
| -1.144283 |           |           |
| C         | -4.364343 | 1.362893  |
| -1.107530 |           |           |
| H         | -4.832880 | 1.518014  |
| -0.134377 |           |           |
| H         | -5.168188 | 1.211112  |
| -1.841344 |           |           |
| H         | -3.829834 | 2.277933  |
| -1.385529 |           |           |
| C         | -4.189143 | -1.150140 |
| -0.825458 |           |           |
| H         | -3.524839 | -2.022079 |
| -0.807000 |           |           |
| H         | -4.940639 | -1.324529 |
| -1.608214 |           |           |
| H         | -4.717997 | -1.103557 |
| 0.130308  |           |           |
| C         | -2.876532 | 0.037701  |
| -2.577927 |           |           |
| H         | -2.224741 | 0.882025  |
| -2.824964 |           |           |
| H         | -3.719860 | 0.045482  |
| -3.282058 |           |           |
| H         | -2.327572 | -0.895311 |
| -2.735199 |           |           |
| C         | -0.597482 | -2.497074 |
| -0.594021 |           |           |
| C         | 0.102580  | -0.379056 |
| -2.277166 |           |           |

|                           |            |                     |
|---------------------------|------------|---------------------|
| N                         | 1.503054   | -2.531220           |
| 2.969307                  |            |                     |
| N                         | 1.009623   | -2.331984           |
| 1.846624                  |            |                     |
| O                         | 0.578754   | -1.074923           |
| 1.622783                  |            |                     |
| H                         | 1.835608   | 5.911324            |
| 0.225574                  |            |                     |
| H                         | 3.198687   | 5.197353            |
| 1.112032                  |            |                     |
| H                         | 3.267907   | 5.327625            |
| -0.647598                 |            |                     |
| 56                        |            |                     |
| complex-1-no-hydride (C6) | el energy= |                     |
| -1215.61666240            |            |                     |
| Ru                        | 0.108017   | -0.645648 -0.114476 |
| P                         | -2.070002  | 0.296252 0.040303   |
| O                         | -0.690877  | -3.592897 0.300282  |
| O                         | 0.059623   | -0.967023 -3.085948 |
| N                         | 2.251669   | -0.734774 0.168550  |
| N                         | 0.644302   | 1.343407 -0.134383  |
| C                         | 2.997987   | -1.848578 0.319005  |
| H                         | 2.451233   | -2.784203 0.378399  |
| C                         | 4.378732   | -1.816884 0.395526  |
| H                         | 4.930149   | -2.744244 0.522854  |
| C                         | 5.048755   | -0.584013 0.304595  |
| C                         | 6.548869   | -0.511020 0.377612  |
| C                         | 4.266737   | 0.559630 0.142861   |
| H                         | 4.750107   | 1.527448 0.064921   |
| C                         | 2.871788   | 0.475323 0.077844   |
| C                         | 1.986182   | 1.640630 -0.083224  |
| C                         | 2.436121   | 2.938263 -0.164685  |
| H                         | 3.492918   | 3.169968 -0.111894  |
| C                         | 1.485174   | 3.986143 -0.321004  |
| H                         | 1.831351   | 5.013256 -0.399653  |
| C                         | 0.150202   | 3.704315 -0.366850  |
| H                         | -0.587790  | 4.492534 -0.482623  |
| C                         | -0.320034  | 2.346129 -0.255122  |
| C                         | -1.660612  | 2.002497 -0.255222  |
| H                         | -2.422236  | 2.759894 -0.405960  |
| C                         | -2.407661  | 0.111459 1.916690   |
| C                         | -3.299220  | 1.250995 2.436252   |
| H                         | -2.865783  | 2.230231 2.208086   |
| H                         | -3.389860  | 1.163618 3.527412   |

|   |           |           |           |
|---|-----------|-----------|-----------|
| H | -4.309478 | 1.214379  | 2.019709  |
| C | -1.017868 | 0.238820  | 2.581962  |
| H | -0.350078 | -0.604963 | 2.321104  |
| H | -1.123470 | 0.201290  | 3.674654  |
| H | -0.522436 | 1.180828  | 2.326758  |
| C | -3.020944 | -1.252436 | 2.265196  |
| H | -4.036593 | -1.361633 | 1.873428  |
| H | -3.083830 | -1.345146 | 3.357571  |
| H | -2.419715 | -2.091705 | 1.899734  |
| C | -3.519775 | -0.211006 | -1.058508 |
| C | -4.847469 | 0.352012  | -0.518227 |
| H | -5.140797 | -0.107531 | 0.430163  |
| H | -5.642060 | 0.139301  | -1.244987 |
| H | -4.810001 | 1.439306  | -0.382372 |
| C | -3.584902 | -1.745664 | -1.159152 |
| H | -2.681756 | -2.155762 | -1.624406 |
| H | -4.436889 | -2.025684 | -1.791582 |
| H | -3.722462 | -2.230694 | -0.188455 |
| C | -3.255306 | 0.379763  | -2.457588 |
| H | -3.237848 | 1.473610  | -2.444755 |
| H | -4.061431 | 0.058745  | -3.129804 |
| H | -2.312214 | 0.029774  | -2.887896 |
| C | -0.393539 | -2.499005 | 0.139748  |
| C | 0.039695  | -0.859040 | -1.943635 |
| H | 6.910214  | 0.518034  | 0.290315  |
| H | 6.910642  | -0.923519 | 1.328170  |
| H | 7.004770  | -1.105048 | -0.424765 |

57

complex-1 (C6)                      el energy= -  
1216.40082975

|    |           |           |           |
|----|-----------|-----------|-----------|
| Ru | 0.142058  | -0.704584 | -0.081104 |
| H  | 0.171810  | -0.595018 | 1.558663  |
| P  | -2.030848 | 0.244113  | 0.074526  |
| O  | -0.731222 | -3.584063 | 0.389546  |
| O  | 0.564205  | -0.860607 | -3.177061 |
| N  | 2.300000  | -0.743218 | 0.115327  |
| N  | 0.688729  | 1.339346  | -0.143782 |
| C  | 3.055563  | -1.841376 | 0.279342  |
| H  | 2.518460  | -2.784432 | 0.282651  |
| C  | 4.431860  | -1.790958 | 0.438800  |
| H  | 4.992268  | -2.713136 | 0.569028  |
| C  | 5.078428  | -0.545675 | 0.432713  |
| C  | 6.571449  | -0.443421 | 0.606323  |
| C  | 4.284041  | 0.585722  | 0.262228  |

|   |           |           |           |
|---|-----------|-----------|-----------|
| H | 4.745476  | 1.567480  | 0.259203  |
| C | 2.896097  | 0.477177  | 0.102994  |
| C | 2.005598  | 1.643172  | -0.076614 |
| C | 2.466876  | 2.947846  | -0.175692 |
| H | 3.522934  | 3.184588  | -0.132077 |
| C | 1.503830  | 3.970649  | -0.352985 |
| H | 1.831154  | 5.005061  | -0.437345 |
| C | 0.167798  | 3.669235  | -0.415407 |
| H | -0.575675 | 4.451019  | -0.546404 |
| C | -0.288171 | 2.307823  | -0.302812 |
| C | -1.627898 | 1.930931  | -0.338730 |
| H | -2.391154 | 2.702115  | -0.391527 |
| C | -2.731323 | 0.250354  | 1.873063  |
| C | -4.149084 | 0.840666  | 1.959929  |
| H | -4.204556 | 1.832405  | 1.494902  |
| H | -4.421701 | 0.960209  | 3.018183  |
| H | -4.906642 | 0.196984  | 1.502834  |
| C | -1.802453 | 1.158636  | 2.701988  |
| H | -0.760843 | 0.828690  | 2.648594  |
| H | -2.120787 | 1.126775  | 3.753692  |
| H | -1.848557 | 2.196158  | 2.355767  |
| C | -2.710354 | -1.164034 | 2.476043  |
| H | -3.337156 | -1.870273 | 1.923207  |
| H | -3.087697 | -1.125315 | 3.508121  |
| H | -1.691450 | -1.560778 | 2.504918  |
| C | -3.401978 | -0.320828 | -1.138300 |
| C | -4.456613 | 0.781873  | -1.355206 |
| H | -5.011693 | 1.033635  | -0.449716 |
| H | -5.184281 | 0.437388  | -2.103643 |
| H | -3.990921 | 1.695425  | -1.740853 |
| C | -4.066020 | -1.624823 | -0.666958 |
| H | -3.322803 | -2.403318 | -0.456886 |
| H | -4.726517 | -2.003142 | -1.460110 |
| H | -4.678986 | -1.485738 | 0.228494  |
| C | -2.733117 | -0.584357 | -2.497644 |
| H | -2.127921 | 0.270151  | -2.819499 |
| H | -3.511218 | -0.754736 | -3.254754 |
| H | -2.098008 | -1.473875 | -2.466556 |
| C | -0.386472 | -2.499587 | 0.186124  |
| C | 0.316978  | -0.793421 | -2.058123 |
| H | 6.909139  | 0.597867  | 0.581409  |
| H | 6.885684  | -0.881177 | 1.562766  |
| H | 7.096504  | -0.991208 | -0.187115 |

60

ts-1-2 (C6) el energy= -1401.03896557

|    |           |           |           |
|----|-----------|-----------|-----------|
| Ru | -0.066168 | -0.395224 | 0.501220  |
| H  | -0.306834 | -0.802422 | -1.221170 |
| P  | 2.144993  | 0.328518  | -0.032639 |
| O  | 0.773901  | -3.225586 | 1.316323  |
| O  | -0.292187 | 0.630302  | 3.381748  |
| N  | -2.229043 | -0.399347 | 0.437123  |
| N  | -0.532612 | 1.542214  | -0.172101 |
| C  | -3.024184 | -1.442663 | 0.729310  |
| H  | -2.519044 | -2.340244 | 1.065464  |
| C  | -4.401549 | -1.393839 | 0.582470  |
| H  | -4.997331 | -2.269209 | 0.826832  |
| C  | -5.002604 | -0.218991 | 0.106529  |
| C  | -6.494106 | -0.132244 | -0.084573 |
| C  | -4.165883 | 0.855718  | -0.187885 |
| H  | -4.592133 | 1.778240  | -0.567280 |
| C  | -2.780033 | 0.756630  | -0.016884 |
| C  | -1.843228 | 1.861141  | -0.311435 |
| C  | -2.251636 | 3.131112  | -0.684500 |
| H  | -3.299729 | 3.385183  | -0.784661 |
| C  | -1.247203 | 4.103675  | -0.914391 |
| H  | -1.535753 | 5.110893  | -1.207841 |
| C  | 0.078464  | 3.787307  | -0.770486 |
| H  | 0.852496  | 4.529500  | -0.946030 |
| C  | 0.483378  | 2.460092  | -0.385930 |
| C  | 1.810210  | 2.067392  | -0.230197 |
| H  | 2.599830  | 2.774392  | -0.467747 |
| C  | 2.764114  | -0.345773 | -1.732003 |
| C  | 4.223372  | 0.032932  | -2.040318 |
| H  | 4.385740  | 1.115077  | -1.969765 |
| H  | 4.452278  | -0.263877 | -3.073617 |
| H  | 4.944993  | -0.472890 | -1.392548 |
| C  | 1.890281  | 0.317212  | -2.814962 |
| H  | 0.822531  | 0.162997  | -2.653882 |
| H  | 2.145992  | -0.120732 | -3.789927 |
| H  | 2.072936  | 1.395509  | -2.861329 |
| C  | 2.596921  | -1.873726 | -1.796252 |
| H  | 3.198093  | -2.393205 | -1.043217 |
| H  | 2.919993  | -2.233966 | -2.783106 |
| H  | 1.554280  | -2.171473 | -1.658174 |
| C  | 3.536533  | 0.150190  | 1.268471  |
| C  | 4.651472  | 1.190298  | 1.041265  |
| H  | 5.175467  | 1.063231  | 0.092563  |
| H  | 5.395275  | 1.094650  | 1.844641  |
| H  | 4.249121  | 2.208608  | 1.081799  |

|   |           |           |           |
|---|-----------|-----------|-----------|
| C | 4.111417  | -1.276090 | 1.281648  |
| H | 3.323451  | -2.028696 | 1.400680  |
| H | 4.798983  | -1.380129 | 2.132814  |
| H | 4.676577  | -1.513066 | 0.375866  |
| C | 2.925355  | 0.435550  | 2.650405  |
| H | 2.375951  | 1.383095  | 2.659864  |
| H | 3.732839  | 0.504933  | 3.392208  |
| H | 2.255107  | -0.367927 | 2.968133  |
| C | 0.409343  | -2.190042 | 0.969583  |
| C | -0.103125 | 0.235487  | 2.319489  |
| N | -1.046374 | -1.298522 | -2.273436 |
| N | -1.338222 | -2.413124 | -1.997769 |
| O | -1.207174 | -3.216700 | -1.080732 |
| H | -7.022540 | -0.344099 | 0.853893  |
| H | -6.799061 | 0.860219  | -0.432173 |
| H | -6.835485 | -0.871172 | -0.821232 |

60

ts-3-4 (C6) el energy= -  
1401.02765700

|    |           |           |           |
|----|-----------|-----------|-----------|
| Ru | 0.050979  | -0.466867 | -0.498297 |
| H  | 1.528387  | -0.835698 | 2.330824  |
| P  | -2.157499 | 0.298624  | 0.031974  |
| O  | -0.788200 | -3.329783 | -1.192645 |
| O  | 0.217233  | 0.532190  | -3.375550 |
| N  | 2.236931  | -0.457437 | -0.555193 |
| N  | 0.543030  | 1.487611  | 0.094739  |
| C  | 3.023811  | -1.502723 | -0.847110 |
| H  | 2.518062  | -2.381493 | -1.234142 |
| C  | 4.396811  | -1.483224 | -0.652526 |
| H  | 4.988243  | -2.361046 | -0.898452 |
| C  | 4.995753  | -0.333949 | -0.117126 |
| C  | 6.476887  | -0.283443 | 0.151219  |
| C  | 4.165652  | 0.748217  | 0.172960  |
| H  | 4.591113  | 1.650772  | 0.598825  |
| C  | 2.786510  | 0.677569  | -0.056352 |
| C  | 1.856950  | 1.793652  | 0.226105  |
| C  | 2.280511  | 3.066558  | 0.569118  |
| H  | 3.332013  | 3.312781  | 0.652403  |
| C  | 1.286663  | 4.056607  | 0.775030  |
| H  | 1.587068  | 5.067433  | 1.043172  |
| C  | -0.042110 | 3.753023  | 0.637561  |
| H  | -0.807368 | 4.508103  | 0.795558  |
| C  | -0.463255 | 2.420733  | 0.286037  |
| C  | -1.794424 | 2.040753  | 0.142377  |

|               |           |              |           |   |           |           |
|---------------|-----------|--------------|-----------|---|-----------|-----------|
| H             | -2.572982 | 2.764073     | 0.367579  | O | -0.702909 | -3.432596 |
| C             | -2.777228 | -0.292460    | 1.756466  |   | -0.898687 |           |
| C             | -4.229685 | 0.115358     | 2.056327  | O | 0.127370  | 0.221892  |
| H             | -4.382076 | 1.195887     | 1.945482  |   | -3.387888 |           |
| H             | -4.450787 | -0.138233    | 3.102760  | N | 2.256704  | -0.474177 |
| H             | -4.963949 | -0.407999    | 1.436833  |   | -0.546994 |           |
| C             | -1.879898 | 0.399157     | 2.802228  | N | 0.550362  | 1.503803  |
| H             | -0.827593 | 0.167165     | 2.629805  |   | -0.055705 |           |
| H             | -2.156286 | 0.025192     | 3.798731  | C | 3.047847  | -1.542420 |
| H             | -2.018138 | 1.485330     | 2.790900  |   | -0.723551 |           |
| C             | -2.609436 | -1.817677    | 1.876919  | H | 2.544232  | -2.468073 |
| H             | -3.179184 | -2.367742    | 1.120696  |   | -0.978919 |           |
| H             | -2.972218 | -2.143640    | 2.862560  | C | 4.424849  | -1.483378 |
| H             | -1.552020 | -2.081621    | 1.795957  |   | -0.569325 |           |
| C             | -3.555210 | 0.078921     | -1.257799 | H | 5.020999  | -2.379420 |
| C             | -4.653689 | 1.143841     | -1.065386 |   | -0.718975 |           |
| H             | -5.168203 | 1.066919     | -0.106490 | C | 5.021913  | -0.270785 |
| H             | -5.407370 | 1.022370     | -1.855965 |   | -0.196958 |           |
| H             | -4.237733 | 2.153334     | -1.156302 | C | 6.510453  | -0.170310 |
| C             | -4.150888 | -1.337703    | -1.202728 |   | 0.009893  |           |
| H             | -3.376687 | -2.106396    | -1.309901 | C | 4.184620  | 0.829009  |
| H             | -4.858189 | -1.463693    | -2.034570 |   | -0.011444 |           |
| H             | -4.697412 | -1.532016    | -0.276108 | H | 4.607511  | 1.779549  |
| C             | -2.959681 | 0.295187     | -2.658386 |   | 0.296205  |           |
| H             | -2.409093 | 1.239570     | -2.721297 | C | 2.801778  | 0.715995  |
| H             | -3.776389 | 0.330406     | -3.392564 |   | -0.191653 |           |
| H             | -2.295225 | -0.524228    | -2.946551 | C | 1.862413  | 1.843181  |
| C             | -0.453527 | -2.259991    | -0.935175 |   | -0.004956 |           |
| C             | 0.040332  | 0.146716     | -2.306344 | C | 2.270614  | 3.153032  |
| N             | 2.141936  | -1.901204    | 2.540600  |   | 0.177451  |           |
| N             | 1.412996  | -2.452124    | 1.798488  | H | 3.319274  | 3.423466  |
| O             | 0.454707  | -1.059445    | 1.443521  |   | 0.198145  |           |
| H             | 7.048965  | -0.581176    | -0.736423 | C | 1.264552  | 4.144069  |
| H             | 6.799029  | 0.720117     | 0.447726  |   | 0.303845  |           |
| H             | 6.745832  | -0.977793    | 0.958323  | H | 1.553525  | 5.183028  |
|               |           |              |           |   | 0.448562  |           |
| 60            |           |              |           | C | -0.061795 | 3.806924  |
| complex-3(C6) |           | el energy= - |           |   | 0.240850  |           |
| 1401.08194921 |           |              |           | H | -0.836298 | 4.563209  |
| Ru            | 0.088783  | -0.504821    |           |   | 0.334765  |           |
| -0.439911     |           |              |           | C | -0.467079 | 2.438000  |
| H             | 1.571742  | -1.410618    |           |   | 0.049984  |           |
| 3.424861      |           |              |           | C | -1.794753 | 2.024747  |
| P             | -2.125778 | 0.276322     |           |   | -0.025258 |           |
| 0.070803      |           |              |           | H | -2.581486 | 2.756148  |

|           |           |           |
|-----------|-----------|-----------|
| 0.135716  |           |           |
| C         | -2.671074 | -0.124368 |
| 1.872375  |           |           |
| C         | -4.111630 | 0.319453  |
| 2.179107  |           |           |
| H         | -4.269542 | 1.380062  |
| 1.948603  |           |           |
| H         | -4.292775 | 0.190013  |
| 3.255488  |           |           |
| H         | -4.867451 | -0.270652 |
| 1.652341  |           |           |
| C         | -1.734884 | 0.679132  |
| 2.798678  |           |           |
| H         | -0.685039 | 0.438353  |
| 2.622346  |           |           |
| H         | -1.974480 | 0.420192  |
| 3.840249  |           |           |
| H         | -1.881762 | 1.756580  |
| 2.670917  |           |           |
| C         | -2.504915 | -1.627533 |
| 2.156524  |           |           |
| H         | -3.134477 | -2.251357 |
| 1.514249  |           |           |
| H         | -2.794264 | -1.832202 |
| 3.197197  |           |           |
| H         | -1.463490 | -1.929735 |
| 2.031051  |           |           |
| C         | -3.558596 | -0.114308 |
| -1.135797 |           |           |
| C         | -4.667009 | 0.953042  |
| -1.036569 |           |           |
| H         | -5.148542 | 0.986693  |
| -0.057972 |           |           |
| H         | -5.444054 | 0.727209  |
| -1.780148 |           |           |
| H         | -4.270651 | 1.948992  |
| -1.262974 |           |           |
| C         | -4.130999 | -1.520325 |
| -0.890890 |           |           |
| H         | -3.348171 | -2.287378 |
| -0.917952 |           |           |
| H         | -4.853195 | -1.757991 |
| -1.684510 |           |           |
| H         | -4.656516 | -1.602446 |
| 0.064250  |           |           |

|                           |            |                     |
|---------------------------|------------|---------------------|
| C                         | -3.009350  | -0.062612           |
| -2.570639                 |            |                     |
| H                         | -2.486256  | 0.878589            |
| -2.768726                 |            |                     |
| H                         | -3.847513  | -0.137642           |
| -3.277003                 |            |                     |
| H                         | -2.332749  | -0.897323           |
| -2.775908                 |            |                     |
| C                         | -0.382671  | -2.344136           |
| -0.720448                 |            |                     |
| C                         | -0.000637  | -0.058005           |
| -2.280417                 |            |                     |
| N                         | 1.725290   | -2.264426           |
| 2.844340                  |            |                     |
| N                         | 1.199012   | -2.082331           |
| 1.733634                  |            |                     |
| O                         | 0.585220   | -0.893106           |
| 1.576925                  |            |                     |
| H                         | 7.053766   | -0.481571           |
| -0.891539                 |            |                     |
| H                         | 6.815279   | 0.851725            |
| 0.257520                  |            |                     |
| H                         | 6.833428   | -0.829684           |
| 0.826018                  |            |                     |
| 59                        |            |                     |
| complex-1-no-hydride (C7) | el energy= |                     |
| -1254.94217238            |            |                     |
| Ru                        | 0.026240   | -0.819016 0.130035  |
| P                         | 2.113795   | 0.306238 -0.053018  |
| O                         | 1.080709   | -3.695640 -0.199478 |
| O                         | 0.094291   | -1.050322 3.109415  |
| N                         | -2.100460  | -1.101108 -0.153943 |
| N                         | -0.677049  | 1.112532 0.075751   |
| C                         | -2.748075  | -2.279207 -0.267312 |
| H                         | -2.122988  | -3.166085 -0.291281 |
| C                         | -4.125916  | -2.368407 -0.349892 |
| H                         | -4.595439  | -3.343388 -0.446000 |
| C                         | -4.899114  | -1.194762 -0.305743 |
| C                         | -6.399497  | -1.252714 -0.387706 |
| C                         | -4.218582  | 0.016400 -0.181980  |
| H                         | -4.782874  | 0.941786 -0.141101  |
| C                         | -2.822053  | 0.054076 -0.108622  |
| C                         | -2.038540  | 1.295248 0.013988   |
| C                         | -2.595634  | 2.550093 0.050856   |

|   |           |           |           |
|---|-----------|-----------|-----------|
| H | -3.669829 | 2.684112  | -0.010282 |
| C | -1.753983 | 3.701696  | 0.171996  |
| C | -2.379553 | 5.069055  | 0.229788  |
| C | -0.399345 | 3.515318  | 0.226833  |
| H | 0.271248  | 4.365895  | 0.314414  |
| C | 0.189689  | 2.202796  | 0.164915  |
| C | 1.555730  | 1.978887  | 0.182226  |
| H | 2.247321  | 2.804788  | 0.308880  |
| C | 2.484988  | 0.088113  | -1.919218 |
| C | 3.279955  | 1.283108  | -2.470262 |
| H | 2.759613  | 2.227569  | -2.280286 |
| H | 3.391143  | 1.166854  | -3.556821 |
| H | 4.284323  | 1.349633  | -2.043450 |
| C | 1.097444  | 0.071603  | -2.600623 |
| H | 0.503311  | -0.818225 | -2.318077 |
| H | 1.219466  | 0.010672  | -3.690545 |
| H | 0.518424  | 0.973713  | -2.379191 |
| C | 3.218513  | -1.228015 | -2.214978 |
| H | 4.234800  | -1.235301 | -1.809906 |
| H | 3.302615  | -1.351868 | -3.302836 |
| H | 2.687626  | -2.103292 | -1.825995 |
| C | 3.592737  | -0.036495 | 1.070986  |
| C | 4.873736  | 0.615774  | 0.518438  |
| H | 5.214135  | 0.147601  | -0.409827 |
| H | 5.676196  | 0.498118  | 1.258084  |
| H | 4.746252  | 1.690191  | 0.341135  |
| C | 3.785992  | -1.555482 | 1.229983  |
| H | 2.918078  | -2.022665 | 1.708438  |
| H | 4.655095  | -1.738904 | 1.874465  |
| H | 3.969163  | -2.063356 | 0.278714  |
| C | 3.268157  | 0.581060  | 2.445745  |
| H | 3.163149  | 1.668759  | 2.392389  |
| H | 4.090819  | 0.350297  | 3.134817  |
| H | 2.351835  | 0.172417  | 2.882074  |
| C | 0.687971  | -2.627809 | -0.069860 |
| C | 0.109083  | -0.973785 | 1.964206  |
| H | -1.623943 | 5.855124  | 0.321849  |
| H | -2.971331 | 5.266187  | -0.674024 |
| H | -3.063284 | 5.148653  | 1.085359  |
| H | -6.847829 | -0.255935 | -0.336262 |
| H | -6.718001 | -1.725317 | -1.325698 |
| H | -6.809075 | -1.856931 | 0.431845  |

60

complex-1 (C7)            el energy= -

|               |           |           |           |
|---------------|-----------|-----------|-----------|
| 1255.72445120 |           |           |           |
| Ru            | 0.032107  | 0.005709  | 0.021355  |
| H             | 0.040945  | 0.134213  | -1.617289 |
| P             | 2.181463  | 1.016430  | -0.066578 |
| O             | 0.993919  | -2.844122 | -0.458200 |
| O             | -0.466069 | -0.194597 | 3.103323  |
| N             | -2.119645 | -0.082844 | -0.231309 |
| N             | -0.567836 | 2.032822  | 0.091148  |
| C             | -2.843428 | -1.197163 | -0.426781 |
| H             | -2.283251 | -2.126715 | -0.426440 |
| C             | -4.216032 | -1.178662 | -0.621215 |
| H             | -4.749938 | -2.112734 | -0.775863 |
| C             | -4.893157 | 0.050264  | -0.618380 |
| C             | -6.383283 | 0.118040  | -0.829842 |
| C             | -4.131605 | 1.198698  | -0.415100 |
| H             | -4.616703 | 2.168999  | -0.413346 |
| C             | -2.746042 | 1.122449  | -0.221059 |
| C             | -1.888707 | 2.307708  | -0.006010 |
| C             | -2.382801 | 3.597779  | 0.094633  |
| H             | -3.444587 | 3.806179  | 0.026497  |
| C             | -1.462734 | 4.661516  | 0.306747  |
| C             | -1.976439 | 6.074534  | 0.422709  |
| C             | -0.122951 | 4.373582  | 0.397424  |
| H             | 0.599099  | 5.171719  | 0.553977  |
| C             | 0.373648  | 3.027360  | 0.284587  |
| C             | 1.722395  | 2.687577  | 0.352150  |
| H             | 2.462815  | 3.478477  | 0.431943  |
| C             | 2.929155  | 1.058782  | -1.845760 |
| C             | 4.332619  | 1.686898  | -1.889769 |
| H             | 4.349738  | 2.675095  | -1.414357 |
| H             | 4.629659  | 1.823832  | -2.939329 |
| H             | 5.094620  | 1.058766  | -1.418572 |
| C             | 1.998571  | 1.950515  | -2.690473 |
| H             | 0.965099  | 1.592728  | -2.667215 |
| H             | 2.344879  | 1.937544  | -3.733737 |
| H             | 2.008098  | 2.985307  | -2.333260 |
| C             | 2.962165  | -0.349625 | -2.462272 |
| H             | 3.593743  | -1.044257 | -1.900055 |
| H             | 3.364654  | -0.290440 | -3.483857 |
| H             | 1.955598  | -0.773555 | -2.521288 |
| C             | 3.535695  | 0.477299  | 1.176255  |
| C             | 4.553846  | 1.605795  | 1.431147  |
| H             | 5.123413  | 1.883523  | 0.542433  |
| H             | 5.272424  | 1.272484  | 2.193333  |
| H             | 4.053743  | 2.501499  | 1.815505  |

|   |           |           |           |
|---|-----------|-----------|-----------|
| C | 4.246958  | -0.803613 | 0.710866  |
| H | 3.530765  | -1.599932 | 0.475209  |
| H | 4.897515  | -1.171326 | 1.517144  |
| H | 4.877945  | -0.639243 | -0.167606 |
| C | 2.838805  | 0.182874  | 2.515083  |
| H | 2.200675  | 1.016966  | 2.826762  |
| H | 3.600920  | 0.028341  | 3.291624  |
| H | 2.230571  | -0.724064 | 2.459734  |
| C | 0.614731  | -1.771662 | -0.251725 |
| C | -0.191428 | -0.109445 | 1.991911  |
| H | -1.160870 | 6.787132  | 0.586229  |
| H | -2.513726 | 6.374822  | -0.487489 |
| H | -2.683946 | 6.169109  | 1.258038  |
| H | -6.747433 | 1.150257  | -0.799784 |
| H | -6.661499 | -0.313629 | -1.800126 |
| H | -6.915006 | -0.453755 | -0.058092 |

63

ts-1-2 (C7)            el energy= -  
1440.36274682

|    |           |           |           |
|----|-----------|-----------|-----------|
| Ru | -0.034842 | -0.605016 | -0.499628 |
| H  | 0.197030  | -0.874355 | 1.250041  |
| P  | -2.173017 | 0.341260  | -0.018705 |
| O  | -1.108038 | -3.420209 | -1.050338 |
| O  | 0.226608  | 0.139260  | -3.462526 |
| N  | 2.123413  | -0.770491 | -0.447822 |
| N  | 0.589007  | 1.341536  | -0.010225 |
| C  | 2.832504  | -1.894818 | -0.645945 |
| H  | 2.255937  | -2.777683 | -0.895089 |
| C  | 4.211292  | -1.939848 | -0.511328 |
| H  | 4.735025  | -2.877591 | -0.676592 |
| C  | 4.906629  | -0.776411 | -0.149522 |
| C  | 6.402770  | -0.788123 | 0.024160  |
| C  | 4.158514  | 0.382358  | 0.048741  |
| H  | 4.658538  | 1.300123  | 0.339257  |
| C  | 2.767256  | 0.375991  | -0.105210 |
| C  | 1.920927  | 1.572179  | 0.091397  |
| C  | 2.428419  | 2.833843  | 0.342531  |
| H  | 3.495715  | 3.011331  | 0.411235  |
| C  | 1.517411  | 3.917079  | 0.493486  |
| C  | 2.050584  | 5.299554  | 0.771652  |
| C  | 0.170718  | 3.673856  | 0.382868  |
| H  | -0.543612 | 4.486088  | 0.494858  |
| C  | -0.343888 | 2.355398  | 0.123099  |
| C  | -1.700255 | 2.058927  | 0.010126  |

|   |           |           |           |
|---|-----------|-----------|-----------|
| H | -2.428277 | 2.845454  | 0.186592  |
| C | -2.814770 | -0.118587 | 1.743003  |
| C | -4.233175 | 0.405492  | 2.028079  |
| H | -4.309270 | 1.485404  | 1.853663  |
| H | -4.466494 | 0.229490  | 3.087724  |
| H | -5.004646 | -0.099973 | 1.440158  |
| C | -1.871670 | 0.570175  | 2.749125  |
| H | -0.822285 | 0.318748  | 2.589829  |
| H | -2.141437 | 0.244857  | 3.763606  |
| H | -1.969891 | 1.659150  | 2.697258  |
| C | -2.769634 | -1.642135 | 1.950752  |
| H | -3.425302 | -2.178995 | 1.257847  |
| H | -3.101036 | -1.880562 | 2.971247  |
| H | -1.757270 | -2.035721 | 1.828848  |
| C | -3.595530 | 0.150921  | -1.284288 |
| C | -4.620960 | 1.293881  | -1.148624 |
| H | -5.137068 | 1.300053  | -0.187220 |
| H | -5.383421 | 1.182064  | -1.932215 |
| H | -4.140126 | 2.268138  | -1.290481 |
| C | -4.281229 | -1.219327 | -1.154146 |
| H | -3.557348 | -2.040676 | -1.207826 |
| H | -4.989858 | -1.348628 | -1.984344 |
| H | -4.847073 | -1.322381 | -0.223994 |
| C | -2.986483 | 0.252911  | -2.692614 |
| H | -2.365831 | 1.149140  | -2.799011 |
| H | -3.798026 | 0.313301  | -3.430805 |
| H | -2.385005 | -0.627279 | -2.936010 |
| C | -0.657149 | -2.390588 | -0.800649 |
| C | 0.024324  | -0.144133 | -2.367542 |
| N | 0.910331  | -1.332719 | 2.340624  |
| N | 1.104436  | -2.488098 | 2.166425  |
| O | 0.893559  | -3.359059 | 1.329349  |
| H | 1.242466  | 6.034570  | 0.850087  |
| H | 2.621454  | 5.319244  | 1.710178  |
| H | 2.732710  | 5.626080  | -0.025306 |
| H | 6.696802  | -1.485224 | 0.819624  |
| H | 6.901620  | -1.119193 | -0.895875 |
| H | 6.786367  | 0.204268  | 0.282738  |

63

ts-3-4 (C7)            el energy= -  
1440.35150001

|    |           |           |           |
|----|-----------|-----------|-----------|
| Ru | -0.050046 | -0.722559 | -0.394287 |
| H  | 1.503366  | -0.733663 | 2.414973  |
| P  | -2.181510 | 0.275280  | 0.060858  |



|   |           |           |           |
|---|-----------|-----------|-----------|
| O | -1.102420 | -3.592452 | -0.593634 |
| O | 0.076189  | -0.209959 | -3.398086 |
| N | 2.129878  | -0.872356 | -0.508285 |
| N | 0.588324  | 1.260620  | -0.139809 |
| C | 2.837602  | -2.002282 | -0.647850 |
| H | 2.262723  | -2.895342 | -0.870948 |
| C | 4.215834  | -2.045341 | -0.499526 |
| H | 4.740959  | -2.989579 | -0.615812 |
| C | 4.906383  | -0.868190 | -0.177568 |
| C | 6.397551  | -0.875807 | 0.034102  |
| C | 4.157759  | 0.300530  | -0.043846 |
| H | 4.655207  | 1.229064  | 0.215707  |
| C | 2.768912  | 0.288190  | -0.217942 |
| C | 1.922056  | 1.495925  | -0.094935 |
| C | 2.435808  | 2.773584  | 0.025882  |
| H | 3.504678  | 2.954710  | 0.039186  |
| C | 1.527954  | 3.868694  | 0.099411  |
| C | 2.068357  | 5.269640  | 0.233465  |
| C | 0.179406  | 3.619623  | 0.045634  |
| H | -0.531941 | 4.440208  | 0.101190  |
| C | -0.342218 | 2.283209  | -0.076715 |
| C | -1.700745 | 1.982102  | -0.124282 |
| H | -2.420803 | 2.785727  | 0.001289  |
| C | -2.775476 | 0.016276  | 1.873700  |
| C | -4.185998 | 0.569098  | 2.139625  |
| H | -4.271299 | 1.625635  | 1.857611  |
| H | -4.384963 | 0.503725  | 3.218700  |
| H | -4.975050 | 0.005832  | 1.632702  |
| C | -1.796550 | 0.802535  | 2.768496  |
| H | -0.769180 | 0.470513  | 2.609870  |
| H | -2.060617 | 0.616438  | 3.819659  |
| H | -1.862116 | 1.879444  | 2.581453  |
| C | -2.705019 | -1.477226 | 2.239475  |
| H | -3.338664 | -2.100524 | 1.599877  |
| H | -3.050932 | -1.611524 | 3.274715  |
| H | -1.671473 | -1.826436 | 2.175139  |
| C | -3.636770 | -0.051994 | -1.139314 |
| C | -4.655468 | 1.104839  | -1.097029 |
| H | -5.138287 | 1.221209  | -0.125684 |
| H | -5.444082 | 0.910176  | -1.837337 |
| H | -4.177765 | 2.054255  | -1.363195 |
| C | -4.321078 | -1.395311 | -0.836183 |
| H | -3.602422 | -2.223155 | -0.832148 |
| H | -5.063402 | -1.606476 | -1.618815 |
| H | -4.846744 | -1.396281 | 0.122378  |

|   |           |           |           |
|---|-----------|-----------|-----------|
| C | -3.080506 | -0.108793 | -2.571272 |
| H | -2.471807 | 0.771490  | -2.802631 |
| H | -3.919812 | -0.135269 | -3.279924 |
| H | -2.482417 | -1.009096 | -2.738091 |
| C | -0.687551 | -2.522085 | -0.521274 |
| C | -0.086464 | -0.407056 | -2.276474 |
| N | 2.052586  | -1.793429 | 2.780560  |
| N | 1.258376  | -2.401697 | 2.159669  |
| O | 0.383930  | -1.020637 | 1.608114  |
| H | 1.262740  | 6.010886  | 0.264040  |
| H | 2.663848  | 5.375237  | 1.150726  |
| H | 2.729411  | 5.518400  | -0.608093 |
| H | 6.913522  | -1.348336 | -0.811101 |
| H | 6.792775  | 0.138095  | 0.155199  |
| H | 6.656032  | -1.449885 | 0.933807  |

63  
 complex-3(C7)            el energy= -  
 1440.40582712

|    |           |           |
|----|-----------|-----------|
| Ru | -0.015520 | -0.700587 |
|    | -0.415663 |           |
| H  | 1.415062  | -1.486637 |
|    | 3.495147  |           |
| P  | -2.159353 | 0.281264  |
|    | 0.050687  |           |
| O  | -1.033676 | -3.580140 |
|    | -0.700526 |           |
| O  | 0.062295  | -0.150720 |
|    | -3.400557 |           |
| N  | 2.148997  | -0.839559 |
|    | -0.526176 |           |
| N  | 0.599364  | 1.283877  |
|    | -0.149739 |           |
| C  | 2.856485  | -1.972962 |
|    | -0.640759 |           |
| H  | 2.282866  | -2.871353 |
|    | -0.839594 |           |
| C  | 4.235038  | -2.008978 |
|    | -0.493455 |           |
| H  | 4.761182  | -2.954679 |
|    | -0.591067 |           |
| C  | 4.923984  | -0.824983 |
|    | -0.195046 |           |
| C  | 6.417347  | -0.824788 |
|    | 0.001473  |           |

|           |           |           |           |           |           |
|-----------|-----------|-----------|-----------|-----------|-----------|
| C         | 4.172887  | 0.343730  | 2.246444  |           |           |
| -0.072833 |           |           | H         | -3.349788 | -2.072040 |
| H         | 4.667601  | 1.276321  | 1.640533  |           |           |
| 0.177314  |           |           | H         | -2.974885 | -1.581665 |
| C         | 2.784383  | 0.325068  | 3.296697  |           |           |
| -0.243069 |           |           | H         | -1.658023 | -1.849951 |
| C         | 1.932589  | 1.528674  | 2.141636  |           |           |
| -0.120862 |           |           | C         | -3.625504 | -0.067720 |
| C         | 2.437167  | 2.810638  | -1.128557 |           |           |
| -0.015656 |           |           | C         | -4.647028 | 1.086686  |
| H         | 3.504846  | 2.999249  | -1.091445 |           |           |
| -0.013504 |           |           | H         | -5.117937 | 1.215776  |
| C         | 1.522077  | 3.899670  | -0.115636 |           |           |
| 0.059080  |           |           | H         | -5.444155 | 0.878356  |
| C         | 2.053572  | 5.304952  | -1.818741 |           |           |
| 0.181920  |           |           | H         | -4.175899 | 2.033528  |
| C         | 0.174845  | 3.641172  | -1.377492 |           |           |
| 0.015430  |           |           | C         | -4.303834 | -1.407823 |
| H         | -0.541895 | 4.457163  | -0.799436 |           |           |
| 0.068458  |           |           | H         | -3.582793 | -2.233424 |
| C         | -0.337494 | 2.300859  | -0.780957 |           |           |
| -0.097533 |           |           | H         | -5.046617 | -1.635793 |
| C         | -1.694427 | 1.989882  | -1.576759 |           |           |
| -0.148803 |           |           | H         | -4.828820 | -1.391543 |
| H         | -2.420907 | 2.788496  | 0.159421  |           |           |
| -0.029352 |           |           | C         | -3.082597 | -0.143763 |
| C         | -2.723518 | 0.030494  | -2.564743 |           |           |
| 1.873499  |           |           | H         | -2.488967 | 0.740466  |
| C         | -4.123664 | 0.601634  | -2.818642 |           |           |
| 2.155586  |           |           | H         | -3.928335 | -0.194449 |
| H         | -4.200976 | 1.655677  | -3.264257 |           |           |
| 1.862389  |           |           | H         | -2.474228 | -1.039339 |
| H         | -4.307728 | 0.550549  | -2.721355 |           |           |
| 3.238047  |           |           | C         | -0.628946 | -2.511180 |
| H         | -4.925665 | 0.041208  | -0.587041 |           |           |
| 1.665955  |           |           | C         | -0.080565 | -0.355991 |
| C         | -1.722440 | 0.812196  | -2.278533 |           |           |
| 2.749167  |           |           | N         | 1.501813  | -2.382238 |
| H         | -0.695298 | 0.482030  | 2.965938  |           |           |
| 2.584152  |           |           | N         | 0.984849  | -2.226701 |
| H         | -1.973645 | 0.632878  | 1.846678  |           |           |
| 3.804697  |           |           | O         | 0.460537  | -1.006522 |
| H         | -1.787636 | 1.888539  | 1.620679  |           |           |
| 2.559299  |           |           | H         | 1.243447  | 6.041489  |
| C         | -2.672799 | -1.461621 | 0.205982  |           |           |

|           |          |           |
|-----------|----------|-----------|
| H         | 2.647598 | 5.421364  |
| 1.098817  |          |           |
| H         | 2.713912 | 5.550739  |
| -0.661006 |          |           |
| H         | 6.929651 | -1.222387 |
| -0.884072 |          |           |
| H         | 6.798772 | 0.183404  |
| 0.193547  |          |           |
| H         | 6.696619 | -1.462561 |
| 0.850212  |          |           |

53

complex-1-no-hydride (C8) el energy= -  
1176.28774605

|    |           |           |           |
|----|-----------|-----------|-----------|
| Ru | 5.945095  | 5.008664  | 9.798333  |
| P  | 6.923852  | 7.243889  | 9.605804  |
| O  | 4.089489  | 5.017269  | 7.358073  |
| O  | 3.644503  | 5.500948  | 11.628669 |
| N  | 7.351575  | 4.908708  | 11.398667 |
| N  | 7.016408  | 1.332441  | 11.617818 |
| C  | 7.679705  | 7.337343  | 11.323654 |
| H  | 8.545227  | 8.007425  | 11.359074 |
| H  | 6.909782  | 7.786269  | 11.965219 |
| C  | 8.034320  | 5.976250  | 11.870574 |
| C  | 9.018980  | 5.801876  | 12.843260 |
| H  | 9.564257  | 6.663264  | 13.217010 |
| C  | 9.284309  | 4.517534  | 13.326764 |
| H  | 10.048307 | 4.370264  | 14.085856 |
| C  | 8.570651  | 3.429078  | 12.830135 |
| H  | 8.742917  | 2.410515  | 13.160697 |
| C  | 7.599411  | 3.654313  | 11.856482 |
| C  | 6.789247  | 2.593640  | 11.229450 |
| C  | 5.841554  | 2.980552  | 10.251429 |
| C  | 5.075864  | 1.953160  | 9.685385  |
| H  | 4.310454  | 2.171974  | 8.943910  |
| C  | 5.302607  | 0.632663  | 10.080168 |
| H  | 4.728276  | -0.185575 | 9.653516  |
| C  | 6.280077  | 0.374391  | 11.049197 |
| H  | 6.474380  | -0.642850 | 11.385055 |
| C  | 8.392834  | 7.152662  | 8.402701  |
| C  | 9.216300  | 8.447322  | 8.335265  |
| H  | 8.653432  | 9.269246  | 7.882813  |
| H  | 10.103823 | 8.277881  | 7.711486  |
| H  | 9.568824  | 8.770149  | 9.322137  |
| C  | 7.861544  | 6.780942  | 7.003644  |

|   |           |           |           |
|---|-----------|-----------|-----------|
| H | 7.305420  | 5.834777  | 7.020652  |
| H | 8.711243  | 6.650176  | 6.321723  |
| H | 7.210744  | 7.547429  | 6.576607  |
| C | 9.291949  | 5.996623  | 8.890265  |
| H | 9.749955  | 6.193284  | 9.865033  |
| H | 10.103102 | 5.849683  | 8.166393  |
| H | 8.748418  | 5.042742  | 8.959380  |
| C | 5.901191  | 8.835177  | 9.462111  |
| C | 4.612958  | 8.599617  | 10.275564 |
| H | 3.992263  | 7.816223  | 9.828930  |
| H | 4.024551  | 9.525654  | 10.285322 |
| H | 4.810012  | 8.331572  | 11.320718 |
| C | 6.645746  | 10.058581 | 10.028919 |
| H | 6.860399  | 9.954218  | 11.098330 |
| H | 6.006716  | 10.943503 | 9.913955  |
| H | 7.584309  | 10.261830 | 9.507163  |
| C | 5.516855  | 9.077774  | 7.992105  |
| H | 6.374045  | 9.382097  | 7.383607  |
| H | 4.780810  | 9.890379  | 7.947973  |
| H | 5.057018  | 8.193526  | 7.534188  |
| C | 4.780382  | 5.012841  | 8.269656  |
| C | 4.519911  | 5.328087  | 10.908157 |

54

complex-1 (C8) el energy= -  
1177.08669782

|    |           |          |           |
|----|-----------|----------|-----------|
| Ru | 5.894152  | 4.996397 | 9.774754  |
| H  | 7.070080  | 4.427649 | 8.759852  |
| P  | 6.931677  | 7.164792 | 9.558092  |
| O  | 4.186669  | 4.896373 | 7.265719  |
| O  | 3.560323  | 5.536861 | 11.767188 |
| N  | 7.359655  | 4.853336 | 11.348394 |
| N  | 6.895258  | 1.303995 | 11.700073 |
| C  | 7.694863  | 7.269482 | 11.277105 |
| H  | 8.546822  | 7.956789 | 11.327220 |
| H  | 6.908896  | 7.687586 | 11.920765 |
| C  | 8.068878  | 5.905384 | 11.806395 |
| C  | 9.076954  | 5.724049 | 12.752018 |
| H  | 9.645525  | 6.580001 | 13.104608 |
| C  | 9.333297  | 4.436306 | 13.236365 |
| H  | 10.117185 | 4.278102 | 13.973650 |
| C  | 8.579825  | 3.365642 | 12.772433 |
| H  | 8.728366  | 2.346520 | 13.112418 |
| C  | 7.586171  | 3.601695 | 11.815062 |
| C  | 6.727323  | 2.558370 | 11.240632 |

|   |           |           |           |
|---|-----------|-----------|-----------|
| C | 5.794457  | 2.959849  | 10.251449 |
| C | 4.990666  | 1.929976  | 9.739602  |
| H | 4.246376  | 2.146002  | 8.975153  |
| C | 5.144496  | 0.624041  | 10.204899 |
| H | 4.528024  | -0.185033 | 9.817598  |
| C | 6.111306  | 0.359326  | 11.184149 |
| H | 6.256454  | -0.651976 | 11.564794 |
| C | 8.444141  | 7.237204  | 8.388886  |
| C | 9.132002  | 8.609964  | 8.323402  |
| H | 8.506081  | 9.371343  | 7.848429  |
| H | 10.047352 | 8.521130  | 7.721879  |
| H | 9.429557  | 8.973556  | 9.314632  |
| C | 7.992843  | 6.806046  | 6.980514  |
| H | 7.536381  | 5.811901  | 7.005410  |
| H | 8.868359  | 6.766403  | 6.317758  |
| H | 7.274858  | 7.503797  | 6.538352  |
| C | 9.471516  | 6.208002  | 8.904987  |
| H | 9.919204  | 6.512194  | 9.857969  |
| H | 10.284700 | 6.126632  | 8.170955  |
| H | 9.024598  | 5.217010  | 9.027443  |
| C | 5.915252  | 8.782403  | 9.451698  |
| C | 4.615431  | 8.543748  | 10.243510 |
| H | 4.014154  | 7.748105  | 9.795607  |
| H | 4.021401  | 9.467983  | 10.240256 |
| H | 4.801698  | 8.276320  | 11.290283 |
| C | 6.623332  | 10.013320 | 10.047232 |
| H | 6.851330  | 9.877481  | 11.110920 |
| H | 5.955209  | 10.882431 | 9.969173  |
| H | 7.550834  | 10.265928 | 9.530015  |
| C | 5.532726  | 9.041012  | 7.983287  |
| H | 6.389528  | 9.347735  | 7.375337  |
| H | 4.791295  | 9.850581  | 7.939138  |
| H | 5.082400  | 8.153067  | 7.522822  |
| C | 4.813665  | 4.943357  | 8.234794  |
| C | 4.438458  | 5.401834  | 11.035922 |

57

ts-1-2 (C8) el energy= -  
1361.72315969

|    |           |           |           |
|----|-----------|-----------|-----------|
| Ru | -0.324455 | -0.571334 | 0.448048  |
| H  | -0.535389 | -0.559086 | -1.333247 |
| P  | 1.930466  | 0.261147  | 0.099056  |
| O  | 0.276566  | -3.556089 | 0.670739  |
| O  | -0.633052 | -0.347483 | 3.488876  |
| C  | -2.411749 | -0.604220 | 0.314389  |

|   |           |           |           |
|---|-----------|-----------|-----------|
| N | -0.756422 | 1.513731  | 0.170293  |
| C | -3.317454 | -1.670781 | 0.389656  |
| H | -2.961858 | -2.677841 | 0.592478  |
| C | -4.677016 | -1.439827 | 0.179429  |
| H | -5.396652 | -2.254476 | 0.228187  |
| C | -5.111668 | -0.138258 | -0.104888 |
| H | -6.167934 | 0.070269  | -0.275469 |
| N | -4.284194 | 0.902401  | -0.184512 |
| H | 2.331826  | 2.749973  | 0.087583  |
| C | -2.976977 | 0.660646  | 0.023073  |
| C | -2.058885 | 1.804379  | -0.065720 |
| C | -2.453069 | 3.112516  | -0.366707 |
| H | -3.504334 | 3.297539  | -0.558454 |
| C | -1.486923 | 4.109774  | -0.414045 |
| H | -1.765932 | 5.133084  | -0.654479 |
| C | -0.150166 | 3.794296  | -0.144381 |
| H | 0.621128  | 4.559014  | -0.161312 |
| C | 0.189071  | 2.476762  | 0.157618  |
| C | 1.596012  | 2.065788  | 0.524302  |
| H | 1.703216  | 2.136289  | 1.615493  |
| C | 2.546564  | 0.325272  | -1.710500 |
| C | 3.970252  | 0.879592  | -1.880265 |
| H | 4.080800  | 1.879628  | -1.443268 |
| H | 4.187886  | 0.968765  | -2.953599 |
| H | 4.733485  | 0.225290  | -1.449344 |
| C | 1.587829  | 1.246392  | -2.494177 |
| H | 0.541480  | 0.953959  | -2.394019 |
| H | 1.843448  | 1.186034  | -3.560514 |
| H | 1.690377  | 2.295068  | -2.192678 |
| C | 2.465188  | -1.098325 | -2.294410 |
| H | 3.170846  | -1.784061 | -1.814607 |
| H | 2.709805  | -1.064510 | -3.364641 |
| H | 1.461011  | -1.517575 | -2.190524 |
| C | 3.352689  | -0.210944 | 1.286257  |
| C | 4.434892  | 0.875212  | 1.428688  |
| H | 4.951737  | 1.091530  | 0.492226  |
| H | 5.189721  | 0.533342  | 2.150365  |
| H | 4.021124  | 1.813739  | 1.816116  |
| C | 3.974743  | -1.538572 | 0.815899  |
| H | 3.208988  | -2.307572 | 0.656939  |
| H | 4.661925  | -1.909094 | 1.588713  |
| H | 4.549584  | -1.428235 | -0.108419 |
| C | 2.726475  | -0.449643 | 2.673193  |
| H | 2.186345  | 0.426394  | 3.050672  |
| H | 3.527745  | -0.675095 | 3.390001  |

|   |           |           |           |
|---|-----------|-----------|-----------|
| H | 2.034553  | -1.295889 | 2.661074  |
| C | 0.006933  | -2.447333 | 0.514551  |
| C | -0.456515 | -0.435710 | 2.354344  |
| N | -1.126913 | -0.784849 | -2.536152 |
| N | -1.362249 | -1.946546 | -2.570273 |
| O | -1.243381 | -2.940269 | -1.869076 |

57

ts-3-4 (C8) el energy= -1361.71147172

|    |           |           |           |
|----|-----------|-----------|-----------|
| Ru | 0.340098  | -0.670296 | -0.330249 |
| H  | 1.841422  | -0.203126 | 2.419835  |
| P  | -1.978499 | 0.160772  | -0.060729 |
| O  | -0.042647 | -3.680356 | -0.019637 |
| O  | 0.481474  | -0.828371 | -3.374985 |
| C  | 2.427081  | -0.632105 | -0.335401 |
| N  | 0.703678  | 1.442814  | -0.394072 |
| C  | 3.368062  | -1.667883 | -0.337545 |
| H  | 3.046520  | -2.703375 | -0.431360 |
| C  | 4.725636  | -1.372670 | -0.200266 |
| H  | 5.472772  | -2.163484 | -0.192395 |
| C  | 5.119301  | -0.036105 | -0.061270 |
| H  | 6.171130  | 0.224723  | 0.054988  |
| N  | 4.255798  | 0.979284  | -0.061608 |
| H  | -2.416107 | 2.609786  | -0.461055 |
| C  | 2.953322  | 0.674825  | -0.199887 |
| C  | 1.998700  | 1.795191  | -0.217593 |
| C  | 2.357997  | 3.139791  | -0.083535 |
| H  | 3.405418  | 3.378321  | 0.065183  |
| C  | 1.361434  | 4.107221  | -0.143959 |
| H  | 1.612340  | 5.159873  | -0.034968 |
| C  | 0.032834  | 3.723998  | -0.354715 |
| H  | -0.760593 | 4.462826  | -0.420753 |
| C  | -0.271146 | 2.369177  | -0.486331 |
| C  | -1.667899 | 1.876002  | -0.779583 |
| H  | -1.771301 | 1.764230  | -1.867718 |
| C  | -2.584970 | 0.507177  | 1.715804  |
| C  | -4.014623 | 1.061946  | 1.807526  |
| H  | -4.144296 | 1.980745  | 1.221889  |
| H  | -4.221938 | 1.314689  | 2.856733  |
| H  | -4.774083 | 0.339409  | 1.493946  |
| C  | -1.622779 | 1.542845  | 2.335441  |
| H  | -0.590112 | 1.188562  | 2.282898  |
| H  | -1.890648 | 1.668292  | 3.394053  |
| H  | -1.708664 | 2.526932  | 1.859517  |
| C  | -2.463050 | -0.807550 | 2.511207  |

|   |           |           |           |
|---|-----------|-----------|-----------|
| H | -3.115716 | -1.595748 | 2.121511  |
| H | -2.755263 | -0.622428 | 3.554475  |
| H | -1.426447 | -1.154610 | 2.498150  |
| C | -3.403093 | -0.502774 | -1.150580 |
| C | -4.495389 | 0.539247  | -1.455546 |
| H | -5.006063 | 0.898911  | -0.560789 |
| H | -5.252951 | 0.081245  | -2.106751 |
| H | -4.092312 | 1.406497  | -1.991772 |
| C | -4.014433 | -1.741905 | -0.471143 |
| H | -3.242652 | -2.472278 | -0.198848 |
| H | -4.705819 | -2.233059 | -1.169485 |
| H | -4.580468 | -1.489956 | 0.430244  |
| C | -2.789074 | -0.955909 | -2.488370 |
| H | -2.268754 | -0.145902 | -3.012044 |
| H | -3.594387 | -1.307318 | -3.147840 |
| H | -2.083334 | -1.779571 | -2.349673 |
| C | 0.104987  | -2.545130 | -0.128965 |
| C | 0.362336  | -0.780841 | -2.229342 |
| N | 2.211613  | -1.187838 | 3.057311  |
| N | 1.290371  | -1.794633 | 2.655479  |
| O | 0.614064  | -0.468992 | 1.727948  |

57

complex-3(C8) el energy= -1361.76466888

|    |           |           |
|----|-----------|-----------|
| Ru | 0.379850  | -0.685135 |
|    | -0.345353 |           |
| H  | 1.625798  | -0.230144 |
|    | 3.684043  |           |
| P  | -1.935662 | 0.147501  |
|    | -0.023463 |           |
| O  | 0.052446  | -3.698091 |
|    | 0.032834  |           |
| O  | 0.410914  | -0.946999 |
|    | -3.374377 |           |
| C  | 2.461144  | -0.643691 |
|    | -0.433509 |           |
| N  | 0.726762  | 1.424075  |
|    | -0.486315 |           |
| C  | 3.400214  | -1.679260 |
|    | -0.432611 |           |
| H  | 3.077601  | -2.716969 |
|    | -0.481903 |           |
| C  | 4.760801  | -1.377002 |
|    | -0.347255 |           |

|            |            |            |            |            |            |
|------------|------------|------------|------------|------------|------------|
| H          | 5. 509823  | -2. 165941 | 2. 234863  |            |            |
| -0. 339619 |            |            | H          | -1. 728620 | 1. 768614  |
| C          | 5. 154843  | -0. 036444 | 3. 373961  |            |            |
| -0. 260137 |            |            | H          | -1. 610604 | 2. 580321  |
| H          | 6. 209294  | 0. 229362  | 1. 809285  |            |            |
| -0. 186724 |            |            | C          | -2. 349963 | -0. 729368 |
| N          | 4. 289310  | 0. 977624  | 2. 598308  |            |            |
| -0. 259172 |            |            | H          | -3. 039837 | -1. 514334 |
| H          | -2. 398326 | 2. 579115  | 2. 272298  |            |            |
| -0. 490595 |            |            | H          | -2. 583968 | -0. 499247 |
| C          | 2. 984536  | 0. 667080  | 3. 646885  |            |            |
| -0. 346676 |            |            | H          | -1. 329268 | -1. 114759 |
| C          | 2. 025943  | 1. 783258  | 2. 552984  |            |            |
| -0. 360383 |            |            | C          | -3. 391104 | -0. 562796 |
| C          | 2. 384182  | 3. 132140  | -1. 039302 |            |            |
| -0. 274556 |            |            | C          | -4. 495399 | 0. 465299  |
| H          | 3. 434877  | 3. 377053  | -1. 348536 |            |            |
| -0. 164370 |            |            | H          | -4. 975855 | 0. 860712  |
| C          | 1. 383197  | 4. 094923  | -0. 452083 |            |            |
| -0. 332084 |            |            | H          | -5. 273801 | -0. 019750 |
| H          | 1. 634090  | 5. 150786  | -1. 953804 |            |            |
| -0. 260585 |            |            | H          | -4. 113015 | 1. 310171  |
| C          | 0. 049580  | 3. 703492  | -1. 933330 |            |            |
| -0. 492055 |            |            | C          | -3. 976980 | -1. 775222 |
| H          | -0. 747491 | 4. 438591  | -0. 292783 |            |            |
| -0. 555638 |            |            | H          | -3. 195015 | -2. 491298 |
| C          | -0. 253527 | 2. 345003  | -0. 011736 |            |            |
| -0. 575118 |            |            | H          | -4. 684826 | -2. 297072 |
| C          | -1. 656994 | 1. 838456  | -0. 951055 |            |            |
| -0. 809137 |            |            | H          | -4. 520084 | -1. 487830 |
| H          | -1. 795187 | 1. 690973  | 0. 612117  |            |            |
| -1. 889106 |            |            | C          | -2. 818316 | -1. 065779 |
| C          | -2. 482919 | 0. 556662  | -2. 377536 |            |            |
| 1. 759290  |            |            | H          | -2. 317929 | -0. 275308 |
| C          | -3. 906707 | 1. 122796  | -2. 948333 |            |            |
| 1. 876240  |            |            | H          | -3. 643111 | -1. 443634 |
| H          | -4. 051099 | 2. 019317  | -2. 996933 |            |            |
| 1. 260472  |            |            | H          | -2. 106422 | -1. 882711 |
| H          | -4. 079770 | 1. 416077  | -2. 230236 |            |            |
| 2. 921041  |            |            | C          | 0. 179540  | -2. 563897 |
| H          | -4. 678381 | 0. 392770  | -0. 092429 |            |            |
| 1. 614301  |            |            | C          | 0. 333250  | -0. 853133 |
| C          | -1. 499680 | 1. 611636  | -2. 228694 |            |            |
| 2. 310544  |            |            | N          | 1. 708277  | -1. 251680 |
| H          | -0. 463100 | 1. 274808  | 3. 485030  |            |            |

N 1.256422 -1.470130  
 2.350941  
 O 0.762629 -0.385439  
 1.712370

59

complex-1-no-hydride (C9) e1  
 energy= -1254.94084813

Ru -0.039224 0.055648 0.046178  
 P -2.304857 0.983294 0.078216  
 O 0.311094 -0.800365 2.879337  
 O -0.627719 -2.824014 -0.824716  
 N 0.421046 2.090933 0.471388  
 N 3.889845 1.594692 -0.337966  
 C -4.079970 2.306402 -1.770979  
 C -1.919307 2.566447 1.014626  
 C -0.497345 3.025423 0.800580  
 C -2.757107 1.530744 -1.685764  
 C 2.140876 3.751154 0.416734  
 C 4.708465 0.588611 -0.682722  
 C 1.722001 2.433798 0.279485  
 C 2.894478 -1.012586 -0.550911  
 C 4.237870 -0.730791 -0.799842  
 C 2.604849 1.314029 -0.102279  
 C 2.022546 0.027899 -0.206510  
 C -0.406922 -1.749954 -0.497703  
 C 0.154076 -0.486292 1.786980  
 C -4.791559 1.268296 1.466002  
 C -4.413295 -0.883881 0.198504  
 C -3.748216 0.217441 1.042262  
 C -3.136149 -0.428835 2.301066  
 C 1.215184 4.744785 0.760123  
 C -2.807000 0.284291 -2.592293  
 C -1.603136 2.429301 -2.179265  
 C -0.121162 4.359199 0.944818  
 H 2.536960 -2.037356 -0.628001  
 H -2.626804 3.368954 0.780541  
 H -2.057553 2.327086 2.077395  
 H 3.188589 3.973385 0.239788  
 H 4.926037 -1.526053 -1.074945  
 H -2.988523 0.601816 -3.626951  
 H -3.602219 -0.412456 -2.316942  
 H -4.979580 -0.475299 -0.644126  
 H -3.683001 -1.606011 -0.186421  
 H -4.943079 1.673958 -1.542357

H -1.856122 -0.263659 -2.578717  
 H -0.628513 1.921542 -2.136624  
 H -4.369397 2.024007 2.137738  
 H -1.518966 3.364147 -1.615663  
 H -2.480757 -1.267503 2.045143  
 H -5.246879 1.780016 0.614371  
 H -2.565927 0.281617 2.911913  
 H -4.212711 2.681450 -2.794388  
 H -0.872847 5.099204 1.205688  
 H -1.782357 2.689783 -3.229855  
 H -4.098810 3.174385 -1.101124  
 H -5.596483 0.763123 2.015252  
 H -3.946220 -0.818604 2.930245  
 H -5.120443 -1.436509 0.829921  
 C 1.646314 6.174118 0.939891  
 H 2.120413 6.303597 1.922634  
 H 2.385772 6.461876 0.184378  
 H 0.798600 6.864431 0.884798  
 C 6.149001 0.944427 -0.933513  
 H 6.229197 1.620263 -1.794462  
 H 6.565867 1.474583 -0.069020  
 H 6.758080 0.057009 -1.130937

60

complex-1 (C9) e1 energy= -  
 1255.73479116

Ru -0.034915 0.008775 0.037551  
 P -2.253117 0.959648 0.006891  
 O 0.347583 -0.770595 3.029297  
 O -0.559064 -2.801309 -0.987625  
 N 0.450361 2.075767 0.396730  
 N 3.953849 1.553689 -0.220844  
 C -4.243391 2.239642 -1.683943  
 C -1.878629 2.552272 0.941398  
 C -0.463374 3.021480 0.698970  
 C -2.858821 1.573121 -1.701212  
 C 2.173259 3.734856 0.340800  
 C 4.779853 0.542368 -0.492119  
 C 1.752299 2.405453 0.227297  
 C 2.944476 -1.039996 -0.484007  
 C 4.303222 -0.775226 -0.629145  
 C 2.642155 1.278830 -0.078704  
 C 2.046754 0.001230 -0.198475  
 C -0.361786 -1.741882 -0.570772  
 C 0.144678 -0.461050 1.939466

|   |           |           |           |
|---|-----------|-----------|-----------|
| C | -4.742015 | 1.250406  | 1.481054  |
| C | -4.380116 | -0.885658 | 0.177514  |
| C | -3.702144 | 0.216289  | 1.011396  |
| C | -3.084594 | -0.446581 | 2.257449  |
| C | 1.248599  | 4.735169  | 0.627986  |
| C | -2.860425 | 0.379929  | -2.675481 |
| C | -1.831863 | 2.608923  | -2.204732 |
| C | -0.093262 | 4.357533  | 0.811271  |
| H | 2.581091  | -2.060081 | -0.596535 |
| H | 0.051780  | 0.369377  | -1.575015 |
| H | -2.598914 | 3.351258  | 0.732706  |
| H | -1.982260 | 2.298276  | 2.005172  |
| H | 3.227324  | 3.945456  | 0.190839  |
| H | 5.003547  | -1.579585 | -0.850062 |
| H | -3.125979 | 0.735386  | -3.680769 |
| H | -3.586291 | -0.389625 | -2.394476 |
| H | -4.954660 | -0.481334 | -0.661657 |
| H | -3.646506 | -1.598896 | -0.217868 |
| H | -5.047198 | 1.533063  | -1.456340 |
| H | -1.869978 | -0.082553 | -2.725648 |
| H | -0.813370 | 2.210333  | -2.184192 |
| H | -4.294272 | 2.013894  | 2.127881  |
| H | -1.858166 | 3.535542  | -1.620189 |
| H | -2.418738 | -1.269561 | 1.984377  |
| H | -5.245790 | 1.756698  | 0.655494  |
| H | -2.512719 | 0.259237  | 2.871238  |
| H | -4.450390 | 2.656587  | -2.679479 |
| H | -0.847874 | 5.104358  | 1.047087  |
| H | -2.076245 | 2.868076  | -3.243951 |
| H | -4.296719 | 3.068864  | -0.967799 |
| H | -5.513270 | 0.738022  | 2.073159  |
| H | -3.892153 | -0.849626 | 2.884041  |
| H | -5.078164 | -1.445431 | 0.815129  |
| C | 1.660335  | 6.180771  | 0.742471  |
| H | 2.738438  | 6.301183  | 0.595781  |
| H | 1.143371  | 6.796508  | -0.005583 |
| H | 1.401620  | 6.587295  | 1.729071  |
| C | 6.247411  | 0.863438  | -0.643056 |
| H | 6.400631  | 1.941646  | -0.539366 |
| H | 6.850078  | 0.350820  | 0.119524  |
| H | 6.629458  | 0.546519  | -1.622999 |

63

ts-1-2 (C9) el energy= -  
1440.37173606

|    |           |           |           |
|----|-----------|-----------|-----------|
| Ru | -0.297158 | -0.558980 | 0.566766  |
| H  | -0.558815 | -0.800787 | -1.190609 |
| P  | 1.934411  | 0.235901  | 0.032614  |
| O  | 0.339538  | -3.481906 | 1.176139  |
| O  | -0.516629 | 0.083351  | 3.554963  |
| N  | -0.757791 | 1.463316  | 0.018647  |
| C  | -3.288986 | -1.661804 | 0.750424  |
| H  | -2.925018 | -2.631829 | 1.079785  |
| C  | -4.651954 | -1.464549 | 0.549216  |
| H  | -5.359782 | -2.271414 | 0.732197  |
| C  | -5.122671 | -0.216469 | 0.098216  |
| C  | -2.972567 | 0.590914  | 0.057868  |
| C  | -2.067488 | 1.714993  | -0.216264 |
| C  | -2.479619 | 2.966634  | -0.682664 |
| H  | -3.539347 | 3.114724  | -0.863858 |
| C  | -1.538878 | 3.969189  | -0.906073 |
| C  | -0.190871 | 3.682774  | -0.626713 |
| H  | 0.573777  | 4.442559  | -0.769807 |
| C  | 0.172683  | 2.425399  | -0.157048 |
| C  | 1.594855  | 2.079384  | 0.219731  |
| H  | 2.310380  | 2.702835  | -0.327555 |
| C  | 2.492100  | 0.057437  | -1.788475 |
| C  | 3.902892  | 0.594440  | -2.078853 |
| H  | 4.016091  | 1.644687  | -1.783299 |
| H  | 4.084694  | 0.540497  | -3.161220 |
| H  | 4.687252  | 0.009275  | -1.590191 |
| C  | 1.497525  | 0.855670  | -2.657750 |
| H  | 0.458586  | 0.572058  | -2.482547 |
| H  | 1.718982  | 0.651531  | -3.713917 |
| H  | 1.597233  | 1.936410  | -2.505559 |
| C  | 2.410122  | -1.432554 | -2.172258 |
| H  | 3.133821  | -2.042876 | -1.622612 |
| H  | 2.628016  | -1.542140 | -3.243260 |
| H  | 1.412669  | -1.839629 | -1.987255 |
| C  | 3.399691  | -0.062550 | 1.223929  |
| C  | 4.475101  | 1.038832  | 1.182243  |
| H  | 4.958708  | 1.129952  | 0.208219  |
| H  | 5.256691  | 0.801860  | 1.917436  |
| H  | 4.064548  | 2.018645  | 1.453471  |
| C  | 4.019431  | -1.438145 | 0.917003  |
| H  | 3.256300  | -2.225399 | 0.887587  |
| H  | 4.733968  | -1.697661 | 1.710050  |
| H  | 4.563929  | -1.450332 | -0.031884 |
| C  | 2.821670  | -0.114210 | 2.650994  |
| H  | 2.283491  | 0.801135  | 2.923330  |



|   |           |           |           |
|---|-----------|-----------|-----------|
| H | 3.648528  | -0.233503 | 3.364321  |
| H | 2.139750  | -0.959080 | 2.778269  |
| C | 0.054055  | -2.405705 | 0.880790  |
| C | -0.373760 | -0.160510 | 2.438355  |
| N | -1.188104 | -1.191754 | -2.334057 |
| N | -1.430272 | -2.344171 | -2.195902 |
| O | -1.296591 | -3.230967 | -1.365851 |
| N | -4.288323 | 0.796146  | -0.143176 |
| H | 1.732887  | 2.296269  | 1.287886  |
| C | -2.388282 | -0.615589 | 0.503419  |
| C | -6.594752 | 0.026070  | -0.130737 |
| H | -7.006334 | -0.679759 | -0.864747 |
| H | -7.169849 | -0.100026 | 0.796872  |
| H | -6.747522 | 1.044226  | -0.500184 |
| C | -1.940678 | 5.320851  | -1.437981 |
| H | -1.501677 | 6.129535  | -0.840135 |
| H | -1.587094 | 5.452347  | -2.469765 |
| H | -3.028562 | 5.442451  | -1.437535 |

63

ts-3-4 (C9) el energy= -  
1440.36017353

|    |           |           |           |
|----|-----------|-----------|-----------|
| Ru | 0.288021  | -0.553036 | -0.659772 |
| H  | 2.020078  | -1.044467 | 1.936156  |
| P  | -1.962248 | 0.174083  | 0.079057  |
| O  | -0.191255 | -3.487475 | -1.341422 |
| O  | 0.183698  | 0.322815  | -3.580570 |
| N  | 0.732949  | 1.451638  | -0.047582 |
| C  | 3.269534  | -1.518029 | -1.267654 |
| H  | 2.905248  | -2.459719 | -1.674136 |
| C  | 4.640667  | -1.298519 | -1.159213 |
| H  | 5.349984  | -2.057931 | -1.483894 |
| C  | 5.115609  | -0.090813 | -0.615697 |
| C  | 2.956570  | 0.640493  | -0.323719 |
| C  | 2.050240  | 1.712532  | 0.118421  |
| C  | 2.472149  | 2.929836  | 0.657792  |
| H  | 3.538895  | 3.089522  | 0.777616  |
| C  | 1.529654  | 3.889765  | 1.023590  |
| C  | 0.172505  | 3.597647  | 0.808423  |
| H  | -0.593626 | 4.326728  | 1.060638  |
| C  | -0.201149 | 2.372245  | 0.264185  |
| C  | -1.638465 | 2.027471  | -0.047523 |
| H  | -1.837337 | 2.293495  | -1.094779 |
| C  | -2.408708 | -0.088703 | 1.916594  |
| C  | -3.799452 | 0.427056  | 2.316482  |

|   |           |           |           |
|---|-----------|-----------|-----------|
| H | -3.932544 | 1.491103  | 2.083684  |
| H | -3.911172 | 0.316917  | 3.404225  |
| H | -4.613884 | -0.135527 | 1.850238  |
| C | -1.354075 | 0.662407  | 2.757189  |
| H | -0.345850 | 0.329595  | 2.497393  |
| H | -1.531942 | 0.429189  | 3.816564  |
| H | -1.431852 | 1.750396  | 2.645725  |
| C | -2.284386 | -1.596009 | 2.214078  |
| H | -3.002355 | -2.196734 | 1.645882  |
| H | -2.482390 | -1.767156 | 3.281649  |
| H | -1.269354 | -1.935609 | 1.991204  |
| C | -3.497526 | -0.065553 | -1.035854 |
| C | -4.565498 | 1.032662  | -0.877430 |
| H | -4.988254 | 1.077117  | 0.127609  |
| H | -5.390879 | 0.830470  | -1.574338 |
| H | -4.169707 | 2.024273  | -1.126719 |
| C | -4.105007 | -1.452584 | -0.756762 |
| H | -3.346217 | -2.242588 | -0.815788 |
| H | -4.871620 | -1.670480 | -1.512984 |
| H | -4.584419 | -1.511081 | 0.224639  |
| C | -3.011666 | -0.051945 | -2.497222 |
| H | -2.502226 | 0.880457  | -2.765892 |
| H | -3.880552 | -0.153494 | -3.161865 |
| H | -2.330650 | -0.882493 | -2.702243 |
| C | -0.006511 | -2.383373 | -1.077206 |
| C | 0.156996  | -0.017456 | -2.479233 |
| N | 2.414867  | -2.189647 | 2.166624  |
| N | 1.440385  | -2.619255 | 1.670736  |
| O | 0.731958  | -1.061662 | 1.315957  |
| C | 2.368358  | -0.535854 | -0.837979 |
| N | 4.278396  | 0.865800  | -0.207429 |
| H | -2.324886 | 2.618631  | 0.568182  |
| C | 1.944259  | 5.199931  | 1.642340  |
| H | 3.012235  | 5.390642  | 1.495157  |
| H | 1.379250  | 6.038443  | 1.217201  |
| H | 1.751353  | 5.193294  | 2.724029  |
| C | 6.594521  | 0.169806  | -0.465080 |
| H | 7.122527  | 0.050267  | -1.420532 |
| H | 6.754385  | 1.188034  | -0.098923 |
| H | 7.050371  | -0.531568 | 0.247179  |

63

complex-3(C9) el energy= -  
1440.41339222

|    |          |           |
|----|----------|-----------|
| Ru | 0.055843 | -0.868926 |
|----|----------|-----------|

|           |           |           |           |           |           |
|-----------|-----------|-----------|-----------|-----------|-----------|
| -0.344965 |           |           | H         | -4.119000 | 2.202744  |
| H         | 1.317766  | -0.581247 | 1.286587  |           |           |
| 3.694634  |           |           | H         | -4.213995 | 1.576211  |
| P         | -2.175859 | 0.167135  | 2.936091  |           |           |
| -0.020122 |           |           | H         | -4.894215 | 0.634370  |
| O         | -0.537737 | -3.846825 | 1.608133  |           |           |
| -0.015179 |           |           | C         | -1.622738 | 1.547841  |
| O         | 0.086182  | -1.082977 | 2.340569  |           |           |
| -3.376876 |           |           | H         | -0.620422 | 1.119530  |
| N         | 0.588812  | 1.200746  | 2.265619  |           |           |
| -0.450972 |           |           | H         | -1.844458 | 1.708943  |
| C         | 2.984915  | -2.116112 | 3.404980  |           |           |
| -0.436047 |           |           | H         | -1.641304 | 2.529744  |
| H         | 2.578278  | -3.122949 | 1.853405  |           |           |
| -0.503500 |           |           | C         | -2.682883 | -0.711012 |
| C         | 4.362474  | -1.931929 | 2.585226  |           |           |
| -0.340359 |           |           | H         | -3.440855 | -1.423984 |
| H         | 5.035980  | -2.787210 | 2.245000  |           |           |
| -0.342667 |           |           | H         | -2.898439 | -0.477429 |
| C         | 4.889428  | -0.632491 | 3.637047  |           |           |
| -0.228188 |           |           | H         | -1.701421 | -1.187254 |
| C         | 2.769711  | 0.249043  | 2.535221  |           |           |
| -0.316737 |           |           | C         | -3.684446 | -0.393497 |
| C         | 1.912992  | 1.445062  | -1.052218 |           |           |
| -0.316492 |           |           | C         | -4.690218 | 0.733958  |
| C         | 2.386158  | 2.754855  | -1.350809 |           |           |
| -0.210277 |           |           | H         | -5.139198 | 1.157054  |
| H         | 3.455611  | 2.900019  | -0.450648 |           |           |
| -0.096387 |           |           | H         | -5.505017 | 0.329974  |
| C         | 1.489683  | 3.821600  | -1.967682 |           |           |
| -0.250751 |           |           | H         | -4.229866 | 1.549978  |
| C         | 0.125625  | 3.532235  | -1.920140 |           |           |
| -0.424144 |           |           | C         | -4.381281 | -1.559645 |
| H         | -0.604192 | 4.336025  | -0.327653 |           |           |
| -0.482384 |           |           | H         | -3.668878 | -2.348779 |
| C         | -0.299848 | 2.211406  | -0.057386 |           |           |
| -0.528280 |           |           | H         | -5.131393 | -2.003643 |
| C         | -1.743142 | 1.839437  | -0.996250 |           |           |
| -0.775621 |           |           | H         | -4.899182 | -1.239328 |
| H         | -1.890190 | 1.724252  | 0.580986  |           |           |
| -1.858286 |           |           | C         | -3.150770 | -0.926074 |
| C         | -2.694026 | 0.595141  | -2.395034 |           |           |
| 1.767130  |           |           | H         | -2.580075 | -0.174365 |
| C         | -4.061108 | 1.286338  | -2.952088 |           |           |
| 1.887141  |           |           | H         | -4.001818 | -1.222241 |

|           |           |           |
|-----------|-----------|-----------|
| -3.023396 |           |           |
| H         | -2.513248 | -1.803447 |
| -2.255188 |           |           |
| C         | -0.310510 | -2.726308 |
| -0.122967 |           |           |
| C         | 0.008417  | -1.001590 |
| -2.230013 |           |           |
| N         | 1.321300  | -1.602943 |
| 3.479691  |           |           |
| N         | 0.855883  | -1.766954 |
| 2.341502  |           |           |
| O         | 0.449637  | -0.637613 |
| 1.720763  |           |           |
| C         | 2.133789  | -1.005737 |
| -0.425290 |           |           |
| N         | 4.097320  | 0.442745  |
| -0.218598 |           |           |
| H         | -2.415841 | 2.638160  |
| -0.445229 |           |           |
| C         | 1.959013  | 5.246050  |
| -0.103209 |           |           |
| H         | 3.040870  | 5.327081  |
| -0.249974 |           |           |
| H         | 1.459694  | 5.907188  |
| -0.821997 |           |           |
| H         | 1.728244  | 5.625254  |
| 0.901904  |           |           |
| C         | 6.375679  | -0.400598 |
| -0.104871 |           |           |
| H         | 6.924986  | -0.868250 |
| -0.932836 |           |           |
| H         | 6.583127  | 0.673362  |
| -0.106156 |           |           |
| H         | 6.767882  | -0.829564 |
| 0.827417  |           |           |

59

complex-1-no-hydride (C10) e1  
energy= -1850.34186333

|    |           |           |           |
|----|-----------|-----------|-----------|
| Ru | -0.044058 | 0.063373  | 0.033021  |
| P  | -2.309325 | 0.987468  | 0.073981  |
| O  | 0.304234  | -0.805214 | 2.863698  |
| O  | -0.649889 | -2.814207 | -0.835693 |
| N  | 0.424574  | 2.097389  | 0.473829  |
| N  | 3.896313  | 1.586269  | -0.293953 |

|   |           |           |           |
|---|-----------|-----------|-----------|
| C | -4.063973 | 2.322085  | -1.783568 |
| C | -1.920486 | 2.568060  | 1.014859  |
| C | -0.498734 | 3.027040  | 0.807709  |
| C | -2.747969 | 1.535432  | -1.692750 |
| C | 2.159075  | 3.746255  | 0.445254  |
| C | 4.693153  | 0.573039  | -0.633795 |
| C | 1.727914  | 2.429839  | 0.295695  |
| C | 2.895878  | -1.017428 | -0.550146 |
| C | 4.248335  | -0.744159 | -0.776492 |
| C | 2.608396  | 1.309077  | -0.080628 |
| C | 2.025887  | 0.023174  | -0.205744 |
| C | -0.423573 | -1.741976 | -0.511093 |
| C | 0.150460  | -0.486397 | 1.773716  |
| C | -4.792933 | 1.270014  | 1.457630  |
| C | -4.414360 | -0.881794 | 0.188196  |
| C | -3.750469 | 0.217311  | 1.035995  |
| C | -3.138205 | -0.430445 | 2.293819  |
| C | 1.217178  | 4.714965  | 0.778702  |
| C | -2.804089 | 0.287840  | -2.597401 |
| C | -1.582620 | 2.422109  | -2.180998 |
| C | -0.120933 | 4.359420  | 0.966536  |
| H | 2.534478  | -2.038811 | -0.645545 |
| H | -2.625317 | 3.372829  | 0.781031  |
| H | -2.061093 | 2.328052  | 2.077243  |
| H | 3.207501  | 3.976909  | 0.291191  |
| H | 4.944232  | -1.530161 | -1.050189 |
| H | -2.979310 | 0.605917  | -3.632773 |
| H | -3.605684 | -0.402114 | -2.324470 |
| H | -4.982323 | -0.470999 | -0.652147 |
| H | -3.684483 | -1.602946 | -0.199406 |
| H | -4.932793 | 1.696521  | -1.557921 |
| H | -1.857441 | -0.267670 | -2.581162 |
| H | -0.612420 | 1.904461  | -2.133091 |
| H | -4.373475 | 2.021850  | 2.135384  |
| H | -1.492732 | 3.358551  | -1.620895 |
| H | -2.485833 | -1.271398 | 2.037013  |
| H | -5.241612 | 1.785817  | 0.604891  |
| H | -2.566521 | 0.278206  | 2.905540  |
| H | -4.189265 | 2.696698  | -2.807921 |
| H | -0.857865 | 5.107127  | 1.240440  |
| H | -1.751368 | 2.681809  | -3.233307 |
| H | -4.078945 | 3.191445  | -1.115446 |
| H | -5.602385 | 0.764741  | 1.999745  |
| H | -3.948441 | -0.818733 | 2.923439  |
| H | -5.120363 | -1.436505 | 0.818812  |

|   |          |           |           |
|---|----------|-----------|-----------|
| C | 1.625083 | 6.172678  | 0.883993  |
| C | 6.147957 | 0.948588  | -0.859157 |
| F | 0.876669 | 6.813611  | 1.795915  |
| F | 2.912207 | 6.294148  | 1.225621  |
| F | 1.444753 | 6.782852  | -0.299203 |
| F | 6.258817 | 1.839527  | -1.855971 |
| F | 6.675475 | 1.496485  | 0.244684  |
| F | 6.880718 | -0.132026 | -1.181717 |

60

complex-1 (C10)      el energy= -  
1851.15512172

|    |           |           |           |
|----|-----------|-----------|-----------|
| Ru | -0.029319 | 0.012124  | 0.035417  |
| P  | -2.251134 | 0.960493  | 0.011088  |
| O  | 0.329087  | -0.816975 | 3.020137  |
| O  | -0.574967 | -2.782956 | -1.019394 |
| N  | 0.458657  | 2.074023  | 0.412878  |
| N  | 3.950538  | 1.544407  | -0.220870 |
| C  | -4.235719 | 2.261389  | -1.667093 |
| C  | -1.872319 | 2.540547  | 0.966608  |
| C  | -0.459119 | 3.012180  | 0.727238  |
| C  | -2.850560 | 1.595438  | -1.690681 |
| C  | 2.192102  | 3.725533  | 0.364598  |
| C  | 4.754439  | 0.523441  | -0.505208 |
| C  | 1.760845  | 2.399984  | 0.242812  |
| C  | 2.938547  | -1.048530 | -0.505652 |
| C  | 4.301589  | -0.791753 | -0.656381 |
| C  | 2.646009  | 1.273083  | -0.075842 |
| C  | 2.046413  | -0.008304 | -0.206265 |
| C  | -0.369424 | -1.730945 | -0.592144 |
| C  | 0.135987  | -0.487304 | 1.935923  |
| C  | -4.737071 | 1.236103  | 1.484990  |
| C  | -4.374883 | -0.886667 | 0.157791  |
| C  | -3.698327 | 0.204824  | 1.006774  |
| C  | -3.084234 | -0.471944 | 2.246878  |
| C  | 1.251282  | 4.701813  | 0.660704  |
| C  | -2.851379 | 0.413513  | -2.678929 |
| C  | -1.823897 | 2.638098  | -2.180270 |
| C  | -0.089436 | 4.348682  | 0.852360  |
| H  | 2.571743  | -2.065830 | -0.625803 |
| H  | 0.051224  | 0.385909  | -1.572955 |
| H  | -2.591117 | 3.343764  | 0.770971  |
| H  | -1.971873 | 2.273196  | 2.027427  |
| H  | 3.243102  | 3.947135  | 0.219117  |
| H  | 5.002957  | -1.587267 | -0.887655 |

|   |           |           |           |
|---|-----------|-----------|-----------|
| H | -3.121196 | 0.780841  | -3.678482 |
| H | -3.574377 | -0.361281 | -2.405380 |
| H | -4.947698 | -0.471980 | -0.677235 |
| H | -3.641757 | -1.596503 | -0.244633 |
| H | -5.039753 | 1.551855  | -1.450531 |
| H | -1.860157 | -0.045875 | -2.739663 |
| H | -0.804538 | 2.241352  | -2.166649 |
| H | -4.290785 | 1.988909  | 2.145239  |
| H | -1.853191 | 3.558745  | -1.586297 |
| H | -2.420670 | -1.294798 | 1.967947  |
| H | -5.235189 | 1.755138  | 0.664216  |
| H | -2.513658 | 0.226221  | 2.870607  |
| H | -4.439928 | 2.690079  | -2.657880 |
| H | -0.830397 | 5.100154  | 1.104569  |
| H | -2.067649 | 2.909835  | -3.216027 |
| H | -4.291637 | 3.082355  | -0.941770 |
| H | -5.512383 | 0.717653  | 2.065898  |
| H | -3.894157 | -0.879549 | 2.866947  |
| H | -5.074315 | -1.452974 | 0.787645  |
| C | 1.649252  | 6.155853  | 0.730501  |
| C | 6.215465  | 0.879744  | -0.655300 |
| F | 0.954198  | 6.808558  | 1.684712  |
| F | 2.956098  | 6.308652  | 0.994519  |
| F | 1.395109  | 6.779413  | -0.438116 |
| F | 6.717445  | 1.410212  | 0.476777  |
| F | 6.409871  | 1.783797  | -1.634499 |
| F | 6.962254  | -0.205606 | -0.955687 |

63

ts-1-2 (C10)      el energy= -  
2035.79017006

|    |           |           |           |
|----|-----------|-----------|-----------|
| Ru | -0.298684 | -0.554270 | 0.571160  |
| H  | -0.570833 | -0.786587 | -1.192250 |
| P  | 1.935203  | 0.234611  | 0.025188  |
| O  | 0.351176  | -3.477226 | 1.168803  |
| O  | -0.480269 | 0.070518  | 3.566986  |
| N  | -0.764039 | 1.466390  | 0.023026  |
| C  | -3.281788 | -1.669900 | 0.777313  |
| H  | -2.913742 | -2.638233 | 1.105263  |
| C  | -4.651432 | -1.480760 | 0.587944  |
| H  | -5.360899 | -2.280419 | 0.774991  |
| C  | -5.098964 | -0.232732 | 0.141159  |
| C  | -2.975691 | 0.587601  | 0.077147  |
| C  | -2.075067 | 1.713169  | -0.204900 |
| C  | -2.498721 | 2.961403  | -0.672341 |

|   |           |           |           |
|---|-----------|-----------|-----------|
| H | -3.556000 | 3.120355  | -0.850524 |
| C | -1.542135 | 3.942704  | -0.892734 |
| C | -0.193058 | 3.683180  | -0.623367 |
| H | 0.558783  | 4.452146  | -0.767037 |
| C | 0.170925  | 2.424480  | -0.153918 |
| C | 1.592167  | 2.077866  | 0.218547  |
| H | 2.305011  | 2.704916  | -0.327534 |
| C | 2.479377  | 0.059568  | -1.799702 |
| C | 3.890378  | 0.594151  | -2.095020 |
| H | 4.006703  | 1.644775  | -1.802063 |
| H | 4.067335  | 0.538414  | -3.177821 |
| H | 4.675562  | 0.008291  | -1.608953 |
| C | 1.483855  | 0.862518  | -2.663621 |
| H | 0.444080  | 0.580242  | -2.490866 |
| H | 1.703044  | 0.661968  | -3.720637 |
| H | 1.587291  | 1.942791  | -2.510211 |
| C | 2.391930  | -1.430113 | -2.183788 |
| H | 3.117580  | -2.042250 | -1.638982 |
| H | 2.603384  | -1.539107 | -3.255864 |
| H | 1.394886  | -1.836103 | -1.994139 |
| C | 3.404134  | -0.063977 | 1.210687  |
| C | 4.475134  | 1.041689  | 1.164630  |
| H | 4.952924  | 1.136358  | 0.188202  |
| H | 5.261350  | 0.805025  | 1.894596  |
| H | 4.063723  | 2.019659  | 1.441269  |
| C | 4.026438  | -1.437000 | 0.896330  |
| H | 3.266920  | -2.227862 | 0.870991  |
| H | 4.746662  | -1.694495 | 1.684564  |
| H | 4.565494  | -1.445743 | -0.055579 |
| C | 2.833361  | -0.120733 | 2.640129  |
| H | 2.296860  | 0.793577  | 2.919300  |
| H | 3.664117  | -0.241454 | 3.348277  |
| H | 2.154197  | -0.967706 | 2.768660  |
| C | 0.060364  | -2.402982 | 0.876404  |
| C | -0.350920 | -0.165253 | 2.448271  |
| N | -1.203276 | -1.168225 | -2.313086 |
| N | -1.447161 | -2.321882 | -2.174503 |
| O | -1.305926 | -3.200841 | -1.337820 |
| N | -4.286370 | 0.789430  | -0.113318 |
| H | 1.729622  | 2.292650  | 1.287210  |
| C | -2.386268 | -0.623349 | 0.522699  |
| C | -6.568346 | 0.046694  | -0.082877 |
| C | -1.934836 | 5.283513  | -1.465209 |
| F | -1.195518 | 6.277293  | -0.931305 |
| F | -1.732487 | 5.312296  | -2.797416 |

|   |           |           |           |
|---|-----------|-----------|-----------|
| F | -3.227654 | 5.565664  | -1.244364 |
| F | -6.815040 | 0.423570  | -1.350726 |
| F | -7.010967 | 1.035541  | 0.718095  |
| F | -7.323878 | -1.043814 | 0.169633  |

63

ts-3-4 (C10) el energy= -

2035.77801338

|    |           |           |           |
|----|-----------|-----------|-----------|
| Ru | 0.316852  | -0.649993 | -0.518743 |
| H  | 1.863887  | -0.883129 | 2.262558  |
| P  | -1.955379 | 0.201560  | -0.020392 |
| O  | -0.226391 | -3.630316 | -0.873062 |
| O  | 0.408802  | -0.126836 | -3.527525 |
| N  | 0.783624  | 1.401042  | -0.106584 |
| C  | 3.295246  | -1.759747 | -0.802896 |
| H  | 2.928828  | -2.732126 | -1.124911 |
| C  | 4.667203  | -1.569565 | -0.622087 |
| H  | 5.376090  | -2.371119 | -0.802884 |
| C  | 5.114851  | -0.317966 | -0.189651 |
| C  | 2.991200  | 0.504878  | -0.131072 |
| C  | 2.093471  | 1.642946  | 0.123914  |
| C  | 2.523964  | 2.900697  | 0.555505  |
| H  | 3.580957  | 3.059379  | 0.735661  |
| C  | 1.571737  | 3.896022  | 0.735443  |
| C  | 0.224561  | 3.639687  | 0.460670  |
| H  | -0.522364 | 4.418413  | 0.572867  |
| C  | -0.146285 | 2.367623  | 0.029492  |
| C  | -1.566384 | 2.019459  | -0.342490 |
| H  | -1.681468 | 2.160955  | -1.425863 |
| C  | -2.518665 | 0.166392  | 1.802431  |
| C  | -3.916966 | 0.752751  | 2.049950  |
| H  | -4.006752 | 1.785835  | 1.691403  |
| H  | -4.097978 | 0.769880  | 3.133564  |
| H  | -4.716008 | 0.156906  | 1.599001  |
| C  | -1.497276 | 0.990516  | 2.614861  |
| H  | -0.483592 | 0.613726  | 2.456431  |
| H  | -1.740627 | 0.882347  | 3.680962  |
| H  | -1.545315 | 2.060442  | 2.379244  |
| C  | -2.453717 | -1.298398 | 2.278458  |
| H  | -3.149461 | -1.947322 | 1.736318  |
| H  | -2.725007 | -1.339694 | 3.342564  |
| H  | -1.435758 | -1.680657 | 2.165438  |
| C  | -3.422474 | -0.133176 | -1.199342 |
| C  | -4.462119 | 1.002497  | -1.236907 |
| H  | -4.939341 | 1.179206  | -0.271743 |

|                |           |           |              |           |           |           |
|----------------|-----------|-----------|--------------|-----------|-----------|-----------|
| H              | -5.252522 | 0.737169  | -1.952554    | -0.502089 |           |           |
| H              | -4.022246 | 1.946443  | -1.579866    | C         | 3.451341  | -2.712976 |
| C              | -4.088371 | -1.462530 | -0.798434    |           | -0.338347 |           |
| H              | -3.353315 | -2.272755 | -0.717258    | H         | 4.037426  | -3.626249 |
| H              | -4.814593 | -1.749230 | -1.571069    |           | -0.335214 |           |
| H              | -4.627480 | -1.392815 | 0.150645     | C         | 4.082619  | -1.470730 |
| C              | -2.849147 | -0.303042 | -2.618530    |           | -0.231365 |           |
| H              | -2.295064 | 0.578453  | -2.960809    | C         | 2.093098  | -0.366114 |
| H              | -3.679767 | -0.458694 | -3.320206    |           | -0.321706 |           |
| H              | -2.186066 | -1.170044 | -2.685066    | C         | 1.366915  | 0.913306  |
| C              | -0.017826 | -2.508878 | -0.734966    |           | -0.321675 |           |
| C              | 0.306472  | -0.331140 | -2.398536    | C         | 1.980526  | 2.164263  |
| N              | 2.201201  | -1.992831 | 2.645758     |           | -0.209242 |           |
| N              | 1.271662  | -2.475938 | 2.120395     | H         | 3.057103  | 2.210492  |
| O              | 0.624322  | -0.939094 | 1.520864     |           | -0.092247 |           |
| C              | 2.401027  | -0.713517 | -0.553667    | C         | 1.178198  | 3.297148  |
| N              | 4.301784  | 0.708071  | 0.052993     |           | -0.252280 |           |
| H              | -2.274519 | 2.696825  | 0.146193     | C         | -0.203900 | 3.176128  |
| C              | 1.973226  | 5.250328  | 1.270222     |           | -0.432047 |           |
| C              | 6.584320  | -0.036286 | 0.031852     | H         | -0.834625 | 4.056625  |
| F              | 3.260641  | 5.528935  | 1.014013     |           | -0.493937 |           |
| F              | 1.220869  | 6.231323  | 0.732196     | C         | -0.760430 | 1.903751  |
| F              | 1.802049  | 5.306059  | 2.605573     |           | -0.539958 |           |
| F              | 7.027193  | 0.942003  | -0.781515    | C         | -2.232005 | 1.678733  |
| F              | 6.829262  | 0.356432  | 1.294796     |           | -0.786620 |           |
| F              | 7.338938  | -1.130362 | -0.206606    | H         | -2.386965 | 1.569934  |
|                |           |           |              |           | -1.868785 |           |
| 63             |           |           |              | C         | -3.291461 | 0.548264  |
| complex-3(C10) |           |           | el energy= - |           | 1.769472  |           |
| 2035.83106182  |           |           |              | C         | -4.581318 | 1.373915  |
| Ru             | -0.719524 |           | -1.191731    |           | 1.895659  |           |
|                | -0.350790 |           |              | H         | -4.550526 | 2.291240  |
| H              | 0.585494  |           | -1.037726    |           | 1.294756  |           |
|                | 3.683563  |           |              | H         | -4.696982 | 1.678581  |
| P              | -2.834384 |           | 0.064086     |           | 2.944924  |           |
|                | -0.019148 |           |              | H         | -5.477535 | 0.808879  |
| O              | -1.634640 |           | -4.084144    |           | 1.623281  |           |
|                | 0.004484  |           |              | C         | -2.125793 | 1.390441  |
| O              | -0.743681 |           | -1.431930    |           | 2.331361  |           |
|                | -3.384404 |           |              | H         | -1.171050 | 0.865859  |
| N              | 0.026154  |           | 0.811677     |           | 2.248394  |           |
|                | -0.461191 |           |              | H         | -2.319495 | 1.572641  |
| C              | 2.058064  |           | -2.745999    |           | 3.397476  |           |
|                | -0.437261 |           |              | H         | -2.054151 | 2.370712  |
| H              | 1.548708  |           | -3.704506    |           | 1.845464  |           |

|           |           |           |                                |           |           |
|-----------|-----------|-----------|--------------------------------|-----------|-----------|
| C         | -3.407104 | -0.750543 | -0.431545                      |           |           |
| 2.591472  |           |           | N                              | 3.426577  | -0.311862 |
| H         | -4.233558 | -1.385326 | -0.221629                      |           |           |
| 2.256167  |           |           | H                              | -2.818809 | 2.545281  |
| H         | -3.595018 | -0.492954 | -0.464496                      |           |           |
| 3.642721  |           |           | C                              | 1.780774  | 4.669358  |
| H         | -2.478579 | -1.322929 | -0.062909                      |           |           |
| 2.541465  |           |           | C                              | 5.586818  | -1.354590 |
| C         | -4.396234 | -0.341619 | -0.122042                      |           |           |
| -1.042991 |           |           | F                              | 3.081721  | 4.695495  |
| C         | -5.279149 | 0.885357  | -0.389498                      |           |           |
| -1.338185 |           |           | F                              | 1.144708  | 5.589999  |
| H         | -5.671850 | 1.358241  | -0.815175                      |           |           |
| -0.436658 |           |           | F                              | 1.674036  | 5.063656  |
| H         | -6.138025 | 0.566753  | 1.221022                       |           |           |
| -1.944746 |           |           | F                              | 6.104836  | -0.670825 |
| H         | -4.741112 | 1.644978  | -1.161107                      |           |           |
| -1.917414 |           |           | F                              | 5.954732  | -0.710290 |
| C         | -5.205829 | -1.426066 | 0.999707                       |           |           |
| -0.308391 |           |           | F                              | 6.176935  | -2.568781 |
| H         | -4.578810 | -2.285010 | -0.105267                      |           |           |
| -0.039338 |           |           | 3                              |           |           |
| H         | -6.002281 | -1.791155 | N2O (wB97XD-SMD-BS2)           |           | e1        |
| -0.970750 |           |           | energy= -184.660675320         |           |           |
| H         | -5.681803 | -1.050160 | N                              | 0.000000  | 0.000000  |
| 0.601789  |           |           | -1.189063                      |           |           |
| C         | -3.930488 | -0.930332 | N                              | 0.000000  | 0.000000  |
| -2.387650 |           |           | -0.074027                      |           |           |
| H         | -3.286110 | -0.245343 | O                              | 0.000000  | 0.000000  |
| -2.950442 |           |           | 1.103770                       |           |           |
| H         | -4.812435 | -1.132904 | 54                             |           |           |
| -3.010101 |           |           | complex-1 (C4, wB97XD-SMD-BS2) |           |           |
| H         | -3.392354 | -1.872591 | e1 energy= -1512.90072253      |           |           |
| -2.251675 |           |           | Ru                             | -0.351525 | -0.711032 |
| C         | -1.285988 | -2.997609 | 0.018296                       |           |           |
| -0.113315 |           |           | H                              | -0.333047 | -0.594276 |
| C         | -0.801859 | -1.332280 | -1.612997                      |           |           |
| -2.239013 |           |           | P                              | 1.794896  | 0.276303  |
| N         | 0.475583  | -2.052069 | -0.058936                      |           |           |
| 3.463606  |           |           | O                              | 0.532943  | -3.556320 |
| N         | -0.004246 | -2.163586 | -0.408849                      |           |           |
| 2.326974  |           |           | O                              | -0.886610 | -0.997185 |
| O         | -0.283157 | -0.991988 | 3.040949                       |           |           |
| 1.704926  |           |           |                                |           |           |
| C         | 1.328996  | -1.554158 |                                |           |           |

|           |           |           |           |          |           |
|-----------|-----------|-----------|-----------|----------|-----------|
| N         | -2.484978 | -0.809791 | -1.846437 |          |           |
| -0.213152 |           |           | H         | 3.975851 | 1.922456  |
| N         | -0.945204 | 1.302321  | -1.378749 |          |           |
| 0.086408  |           |           | H         | 4.259088 | 1.064154  |
| C         | -3.192439 | -1.930938 | -2.890860 |          |           |
| -0.381117 |           |           | H         | 4.710682 | 0.308650  |
| H         | -2.632020 | -2.855308 | -1.369274 |          |           |
| -0.373542 |           |           | C         | 1.656005 | 1.203251  |
| C         | -4.560568 | -1.925598 | -2.683813 |          |           |
| -0.557794 |           |           | H         | 0.616593 | 0.875004  |
| H         | -5.088342 | -2.859913 | -2.667163 |          |           |
| -0.691244 |           |           | H         | 2.009817 | 1.152399  |
| C         | -5.221728 | -0.707661 | -3.718065 |          |           |
| -0.561657 |           |           | H         | 1.691400 | 2.245297  |
| H         | -6.294062 | -0.661144 | -2.363038 |          |           |
| -0.702678 |           |           | C         | 2.595710 | -1.086850 |
| C         | -4.493474 | 0.452864  | -2.425925 |          |           |
| -0.385185 |           |           | H         | 3.186626 | -1.789457 |
| H         | -4.991483 | 1.411374  | -1.838662 |          |           |
| -0.387196 |           |           | H         | 3.045306 | -1.030169 |
| C         | -3.116905 | 0.382007  | -3.422304 |          |           |
| -0.206022 |           |           | H         | 1.590322 | -1.493966 |
| C         | -2.261111 | 1.575267  | -2.537941 |          |           |
| -0.002850 |           |           | C         | 3.125588 | -0.253143 |
| C         | -2.754113 | 2.853786  | 1.193852  |          |           |
| 0.098698  |           |           | C         | 4.131306 | 0.872609  |
| H         | -3.810137 | 3.066185  | 1.467028  |          |           |
| 0.031505  |           |           | H         | 4.691400 | 1.175185  |
| C         | -1.823392 | 3.894738  | 0.585842  |          |           |
| 0.301410  |           |           | H         | 4.853419 | 0.521731  |
| H         | -2.178408 | 4.915525  | 2.210595  |          |           |
| 0.384901  |           |           | H         | 3.635358 | 1.752691  |
| C         | -0.492339 | 3.631943  | 1.879942  |          |           |
| 0.389236  |           |           | C         | 3.854701 | -1.519208 |
| H         | 0.224145  | 4.429486  | 0.737326  |          |           |
| 0.540161  |           |           | H         | 3.155046 | -2.320677 |
| C         | -0.002128 | 2.286604  | 0.489893  |          |           |
| 0.277583  |           |           | H         | 4.488442 | -1.876705 |
| C         | 1.336700  | 1.947417  | 1.554583  |          |           |
| 0.340859  |           |           | H         | 4.499821 | -1.347358 |
| H         | 2.076606  | 2.733314  | -0.123554 |          |           |
| 0.419832  |           |           | C         | 2.426315 | -0.566523 |
| C         | 2.557706  | 0.317070  | 2.518973  |          |           |
| -1.814657 |           |           | H         | 1.781273 | 0.252712  |
| C         | 3.958479  | 0.935692  | 2.843224  |          |           |



|                                |           |           |          |           |           |
|--------------------------------|-----------|-----------|----------|-----------|-----------|
| H                              | 3.186238  | -0.718227 | 0.109986 |           |           |
| 3.290954                       |           |           | C        | 2.514872  | 3.086636  |
| H                              | 1.837352  | -1.481244 | 0.348898 |           |           |
| 2.453314                       |           |           | H        | 3.561282  | 3.345907  |
| C                              | 0.197437  | -2.472999 | 0.396680 |           |           |
| -0.229037                      |           |           | C        | 1.520289  | 4.077129  |
| C                              | -0.586256 | -0.861662 | 0.514427 |           |           |
| 1.949224                       |           |           | H        | 1.818831  | 5.100525  |
|                                |           |           | 0.709662 |           |           |
| 57                             |           |           | C        | 0.202429  | 3.762605  |
| complex-3 (C4, wB97XD-SMD-BS2) |           | e1        | 0.426342 |           |           |
| energy= -1697.58541685         |           |           | H        | -0.561245 | 4.520017  |
| Ru                             | 0.317087  | -0.491694 | 0.548255 |           |           |
| -0.429040                      |           |           | C        | -0.213736 | 2.411407  |
| H                              | 1.538824  | -1.488914 | 0.168510 |           |           |
| 3.508540                       |           |           | C        | -1.536644 | 2.026489  |
| P                              | -1.902606 | 0.288537  | 0.061020 |           |           |
| 0.033428                       |           |           | H        | -2.313090 | 2.759419  |
| O                              | -0.459309 | -3.350260 | 0.236245 |           |           |
| -1.068879                      |           |           | C        | -2.543501 | -0.183091 |
| O                              | 0.488230  | 0.246053  | 1.770237 |           |           |
| -3.323901                      |           |           | C        | -3.976876 | 0.288591  |
| N                              | 2.462124  | -0.490709 | 2.032835 |           |           |
| -0.514353                      |           |           | H        | -4.090636 | 1.359677  |
| N                              | 0.788869  | 1.476899  | 1.853558 |           |           |
| 0.036765                       |           |           | H        | -4.205720 | 0.108818  |
| C                              | 3.229923  | -1.550829 | 3.087831 |           |           |
| -0.775375                      |           |           | H        | -4.721310 | -0.247265 |
| H                              | 2.717172  | -2.454584 | 1.445709 |           |           |
| -1.073185                      |           |           | C        | -1.647244 | 0.528635  |
| C                              | 4.604873  | -1.510132 | 2.793560 |           |           |
| -0.665142                      |           |           | H        | -0.593391 | 0.304008  |
| H                              | 5.187667  | -2.393854 | 2.644467 |           |           |
| -0.884872                      |           |           | H        | -1.929385 | 0.184284  |
| C                              | 5.199128  | -0.326138 | 3.793640 |           |           |
| -0.260744                      |           |           | H        | -1.788540 | 1.609757  |
| H                              | 6.273920  | -0.257952 | 2.757501 |           |           |
| -0.150843                      |           |           | C        | -2.450490 | -1.697820 |
| C                              | 4.404446  | 0.772857  | 1.979877 |           |           |
| 0.007780                       |           |           | H        | -3.064377 | -2.257620 |
| H                              | 4.853240  | 1.700519  | 1.274819 |           |           |
| 0.332140                       |           |           | H        | -2.804307 | -1.940032 |
| C                              | 3.026605  | 0.673168  | 2.986814 |           |           |
| -0.132879                      |           |           | H        | -1.423496 | -2.049533 |
| C                              | 2.097888  | 1.803681  | 1.896460 |           |           |

|                             |           |           |          |           |           |
|-----------------------------|-----------|-----------|----------|-----------|-----------|
| C                           | -3.280124 | 0.003750  | 1.924206 |           |           |
| -1.245724                   |           |           | O        | -3.738471 | 0.376367  |
| C                           | -4.352857 | 1.097311  | 1.197650 |           |           |
| -1.155718                   |           |           | O        | 0.508785  | -0.441767 |
| H                           | -4.865593 | 1.123645  | 1.821347 |           |           |
| -0.197930                   |           |           | N        | -1.535053 | -0.141663 |
| H                           | -5.105555 | 0.906601  | 4.662182 |           |           |
| -1.926327                   |           |           | N        | -0.072102 | 2.033513  |
| H                           | -3.927280 | 2.083595  | 4.345889 |           |           |
| -1.348109                   |           |           | C        | -2.333489 | -1.208117 |
| C                           | -3.914683 | -1.381191 | 4.748693 |           |           |
| -1.094543                   |           |           | H        | -2.978674 | -1.394775 |
| H                           | -3.164735 | -2.174693 | 3.901375 |           |           |
| -1.103437                   |           |           | C        | -2.351397 | -2.028211 |
| H                           | -4.584223 | -1.553309 | 5.858162 |           |           |
| -1.942272                   |           |           | H        | -3.017129 | -2.879602 |
| H                           | -4.508072 | -1.479824 | 5.886274 |           |           |
| -0.187070                   |           |           | C        | -1.512297 | -1.722896 |
| C                           | -2.671571 | 0.087465  | 6.917112 |           |           |
| -2.646571                   |           |           | H        | -1.505603 | -2.335248 |
| H                           | -2.115280 | 1.014633  | 7.809775 |           |           |
| -2.794365                   |           |           | C        | -0.681395 | -0.621765 |
| H                           | -3.482063 | 0.068776  | 6.826542 |           |           |
| -3.380417                   |           |           | H        | -0.025478 | -0.368223 |
| H                           | -2.025201 | -0.764970 | 7.646704 |           |           |
| -2.856730                   |           |           | C        | -0.701090 | 0.159359  |
| C                           | -0.156746 | -2.281346 | 5.678397 |           |           |
| -0.810802                   |           |           | C        | 0.171275  | 1.342573  |
| C                           | 0.298077  | -0.029322 | 5.481472 |           |           |
| -2.232668                   |           |           | C        | 1.171173  | 1.696604  |
| N                           | 1.575225  | -2.374281 | 6.348654 |           |           |
| 2.971957                    |           |           | H        | 1.366858  | 1.137950  |
| N                           | 1.152198  | -2.164979 | 7.250835 |           |           |
| 1.826802                    |           |           | C        | 1.961164  | 2.819261  |
| O                           | 0.762515  | -0.926569 | 6.012353 |           |           |
| 1.580989                    |           |           | H        | 2.756170  | 3.127453  |
|                             |           |           | 6.681345 |           |           |
| 57                          |           |           | C        | 1.739057  | 3.508013  |
| ts-3-4 (C4, wB97XD-SMD-BS2) |           | e1        | 4.863613 |           |           |
| energy= -1697.52711701      |           |           | H        | 2.345716  | 4.365194  |
| Ru                          | -1.562169 | 1.321688  | 4.601013 |           |           |
| 3.080758                    |           |           | C        | 0.688789  | 3.116296  |
| H                           | -3.209191 | 2.031537  | 3.964115 |           |           |
| 5.643066                    |           |           | C        | 0.417226  | 3.768459  |
| P                           | -1.087596 | 3.361705  | 2.776617 |           |           |

|           |           |          |           |           |
|-----------|-----------|----------|-----------|-----------|
| H         | 0.977603  | 4.659835 | -0.174190 |           |
| 2.526958  |           |          | H         | 0.422220  |
| C         | -2.335893 | 4.763129 | -1.415497 | 4.385128  |
| 2.281364  |           |          | H         | 1.166726  |
| C         | -2.051293 | 6.043258 | 0.182276  | 4.417540  |
| 1.489862  |           |          | C         | -1.991190 |
| H         | -1.028306 | 6.394463 | -0.775278 | 3.328755  |
| 1.640253  |           |          | H         | -2.683877 |
| H         | -2.721461 | 6.826072 | -0.471179 | 2.541454  |
| 1.858383  |           |          | H         | -1.727854 |
| H         | -2.233644 | 5.939498 | -1.821447 | 3.147431  |
| 0.421328  |           |          | H         | -2.515808 |
| C         | -2.203120 | 5.122287 | -0.732633 | 4.281707  |
| 3.767947  |           |          | C         | 0.035777  |
| H         | -2.325990 | 4.251888 | -0.252145 | 2.014457  |
| 4.408018  |           |          | H         | 0.915669  |
| H         | -2.990140 | 5.840643 | 0.380490  | 1.886086  |
| 4.018611  |           |          | H         | 0.378300  |
| H         | -1.240231 | 5.589669 | -1.290014 | 2.051134  |
| 3.978579  |           |          | H         | -0.614164 |
| C         | -3.763898 | 4.283216 | -0.155959 | 1.144412  |
| 2.002041  |           |          | C         | -2.932553 |
| H         | -3.913277 | 3.993304 | 1.921712  | 0.735244  |
| 0.962013  |           |          | C         | -0.271213 |
| H         | -4.461611 | 5.098321 | 2.199331  | 0.301206  |
| 2.218758  |           |          | N         | -4.400994 |
| H         | -4.023722 | 3.441071 | 5.761921  | 1.499745  |
| 2.641942  |           |          | N         | -4.359935 |
| C         | -0.709221 | 3.313014 | 4.578823  | 1.527520  |
| 0.061808  |           |          | O         | -2.957898 |
| C         | 0.212752  | 4.470121 | 4.371832  | 2.192584  |
| -0.345124 |           |          |           |           |
| H         | -0.221991 | 5.451350 |           |           |
